# Supplementary material for: Lipophilicity and Click Reactivity Determine the Performance of Bioorthogonal Tetrazine Tools in Pretargeted In Vivo Chemistry
Source: PubMed Central journal article supplement — ACS Pharmacol Transl Sci. 2021 Feb 16;4(2):824–33. doi: 10.1021/acsptsci.1c00007 (PMC8033778; doi:10.1021/acsptsci.1c00007), 2021-02-16

## Supporting Information (2)

### Lipophilicity and click reactivity determine the performance of bioorthogonal tetrazine tools in pretargeted *in vivo* chemistry

E. Johanna L. Stéen<sup>†,‡,¶</sup>, Jesper T. Jørgensen<sup>‡,¶,†</sup>, Christoph Denk<sup>¶,†</sup>, Umberto M. Battisti<sup>†</sup>, Kamilla Nørregård<sup>‡,¶</sup>, Patricia E. Edem<sup>†,‡</sup>, Klas Bratteby<sup>‡,†,#</sup>, Vladimir Shalgunov<sup>†,‡</sup>, Martin Wilkovitsch<sup>¶</sup>, Dennis Svatunek<sup>¶</sup>, Christian B. M. Poulie<sup>†,‡</sup>, Lars Hvass<sup>‡,¶</sup>, Marina Simón<sup>‡,¶,†</sup>, Thomas Wanek<sup>§</sup>, Raffaella Rossin<sup>¶</sup>, Marc Robillard<sup>¶</sup>, Jesper L. Kristensen<sup>†</sup>, Hannes Mikula<sup>¶,\*</sup>, Andreas Kjaer<sup>‡,¶,\*</sup> and Matthias M. Herth<sup>†,‡,\*</sup>

<sup>†</sup>Department of Drug Design and Pharmacology, Faculty of Health and Medical Sciences, University of Copenhagen, Universitetsparken 2, 2100 Copenhagen, Denmark.

<sup>‡</sup>Department of Clinical Physiology, Nuclear Medicine & PET, Rigshospitalet, Blegdamsvej 9, 2100 Copenhagen, Denmark.

<sup>‡</sup>Cluster for Molecular Imaging, Department of Biomedical Sciences, University of Copenhagen, Blegdamsvej 3, 2100 Copenhagen Ø, Denmark.

<sup>#</sup> Department of Radiation Physics, Skåne University Hospital, Barngatan 3, 22242 Lund, Sweden

<sup>§§</sup>Preclinical Molecular Imaging, AIT Austrian Institute of Technology GmbH, 2444 Seibersdorf, Austria

<sup>¶</sup>Institute of Applied Synthetic Chemistry, Technische Universität Wien (TU Wien), Getreidemarkt 9, 1060 Vienna, Austria.

<sup>¶</sup>Tagworks Pharmaceuticals, Geert Grooteplein 10, 6525 GA Nijmegen, Netherlands.

<sup>†</sup>Equally contributing authors

\*Corresponding authors

### NMR Spectra for compounds 1-45 (Tz library)

[except for tetrazines obtained as copper(II) complexes and purchased compounds]

3-(4-((1-(2-Fluoroethyl)-1H-1,2,3-triazol-4-yl)methoxy)phenyl)-1,2,4,5-tetrazine (1)

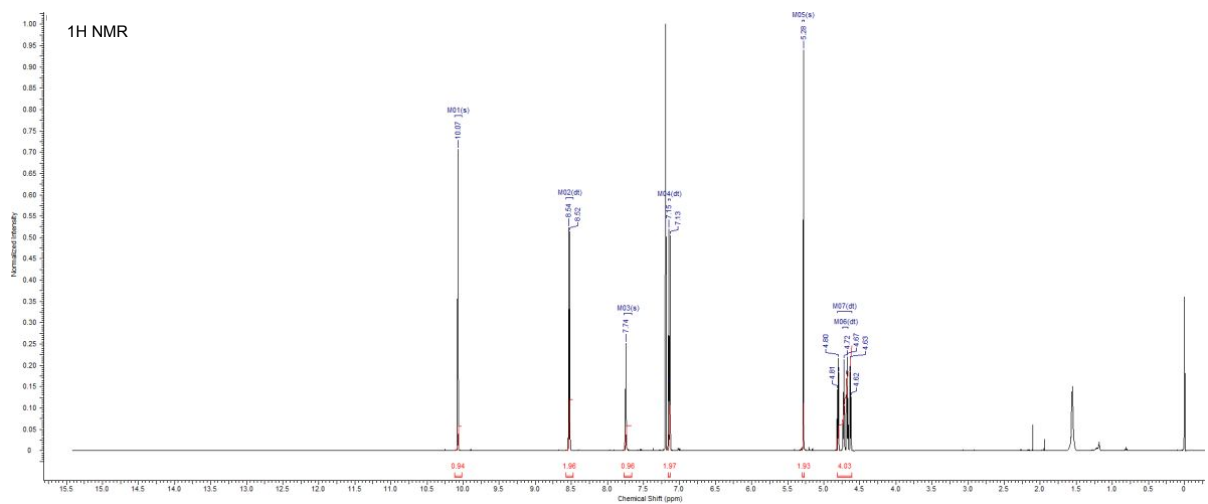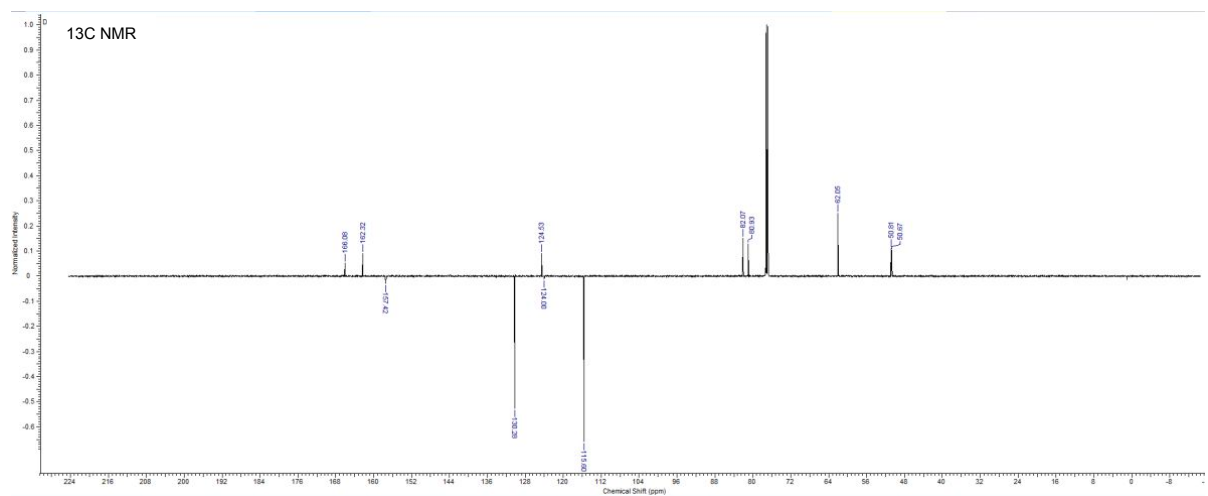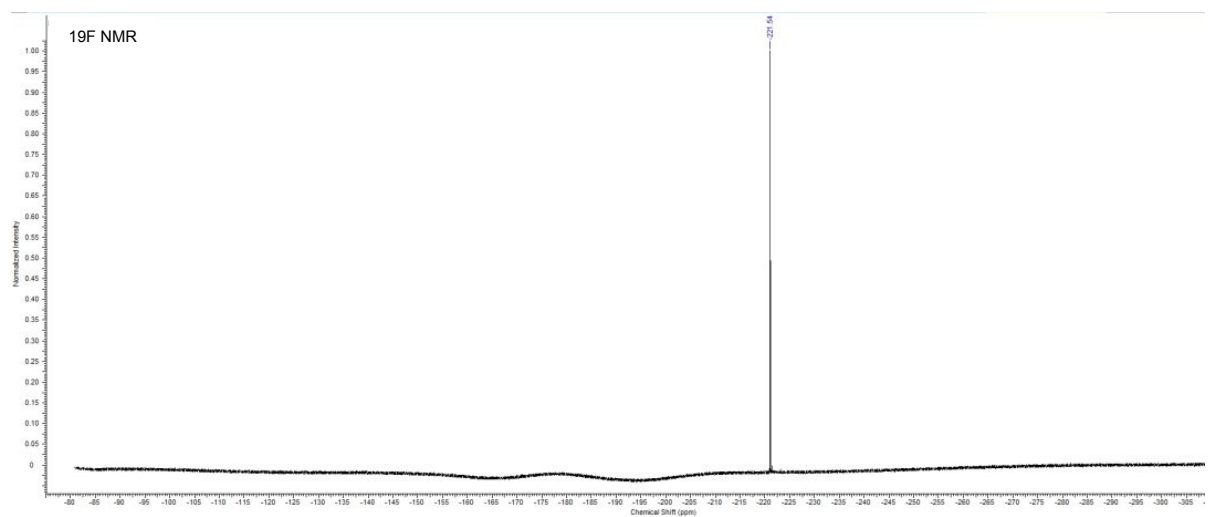

3-(4-((1-(2-(2-(2-(2-Fluoroethoxy)ethoxy)ethoxy)ethyl)-1H-1,2,3-triazol-4-yl)methoxy)phenyl)-1,2,4,5-tetrazine (2)

<sup>1</sup>H NMR

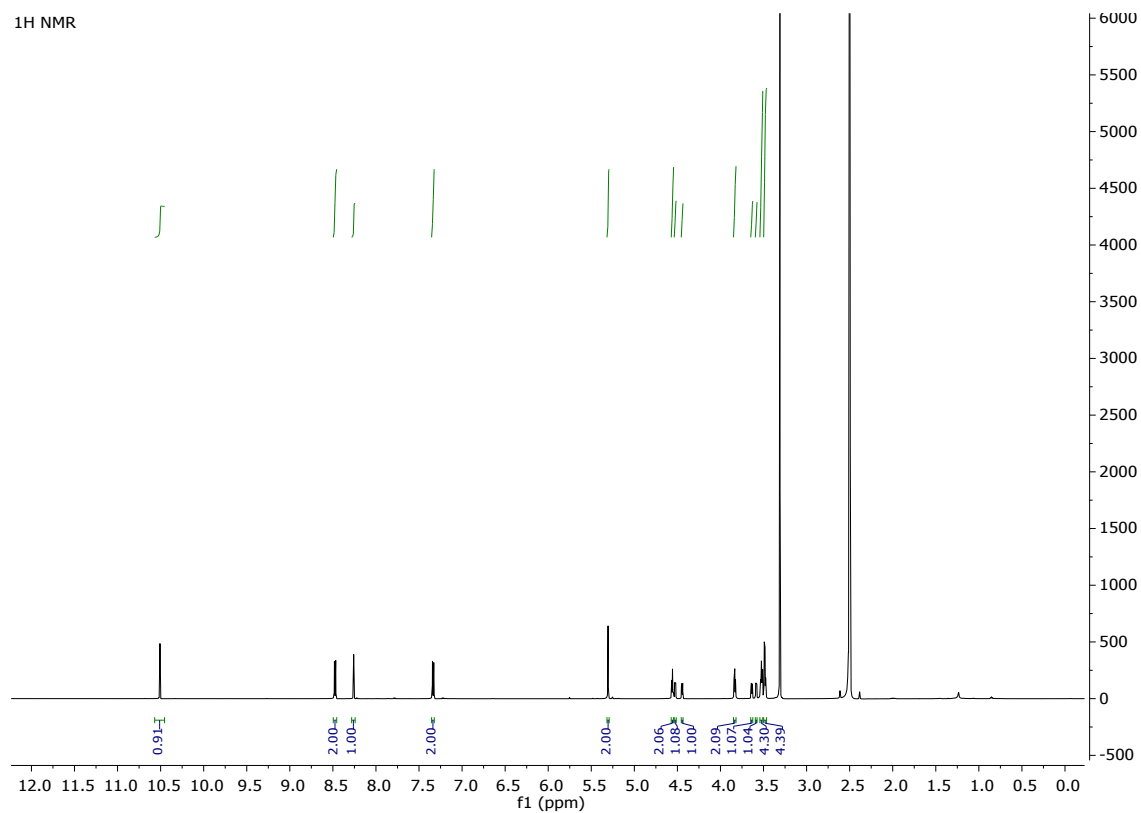

<sup>13</sup>C NMR

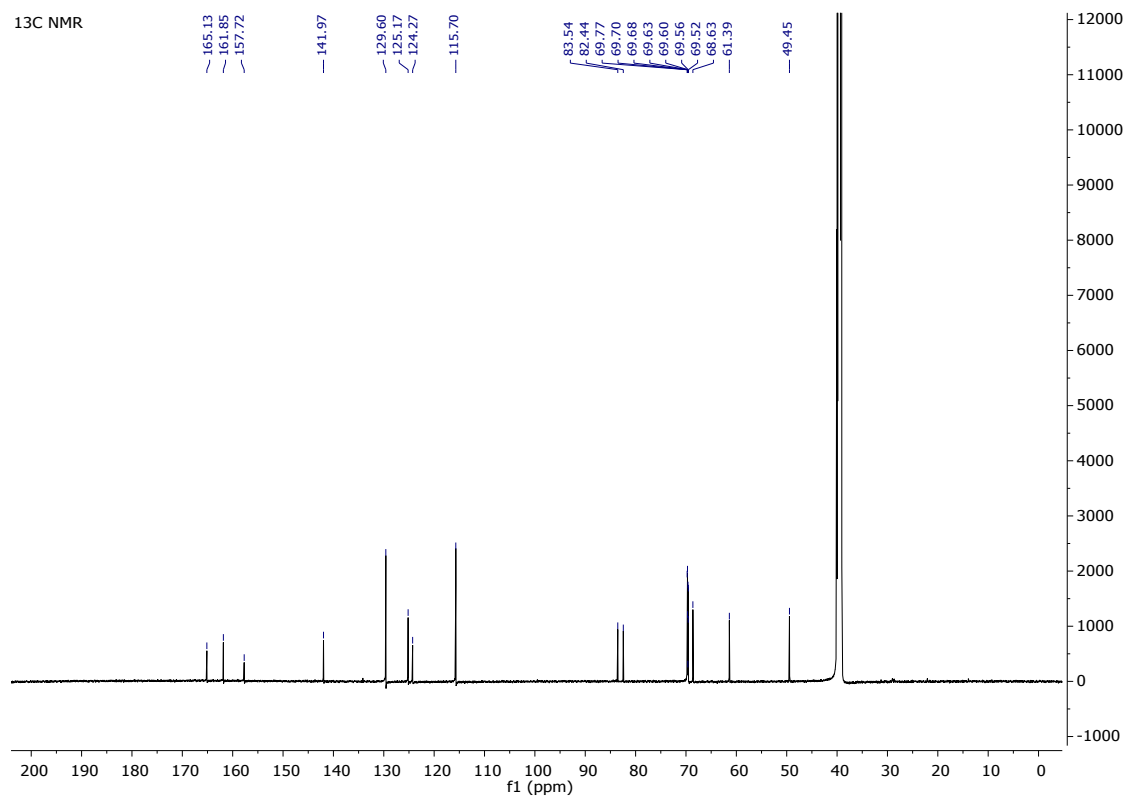

(2R,3R,4S,5S,6S)-2-(4-((1,2,4,5-Tetrazin-3-yl)phenoxy)methyl)-1H-1,2,3-triazol-1-yl)-6-(fluoromethyl)tetrahydro-2H-pyran-3,4,5-triol (3)

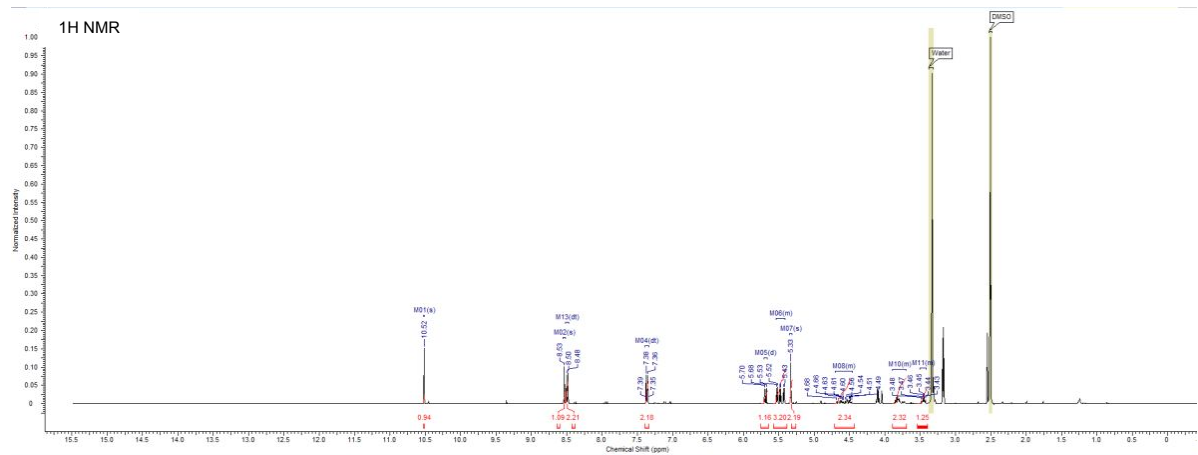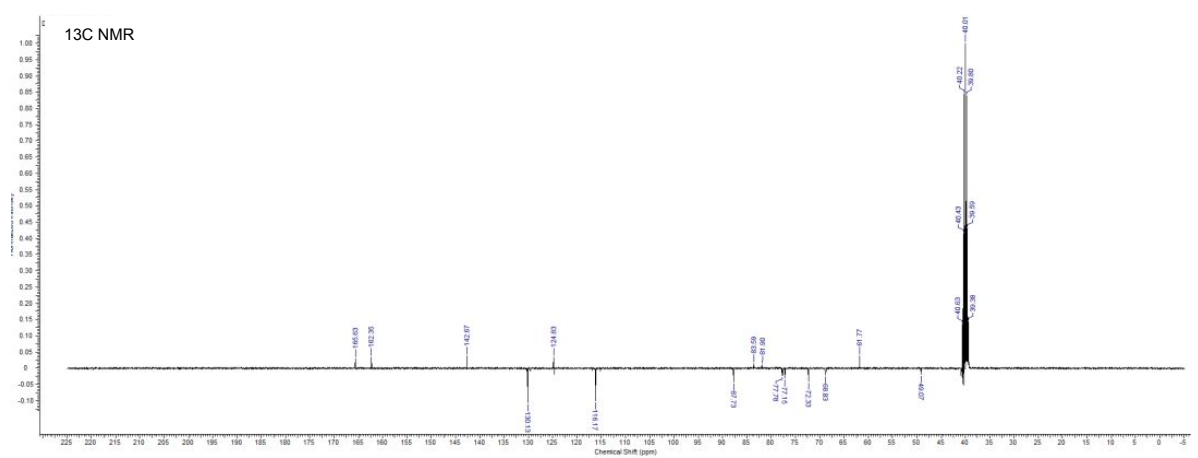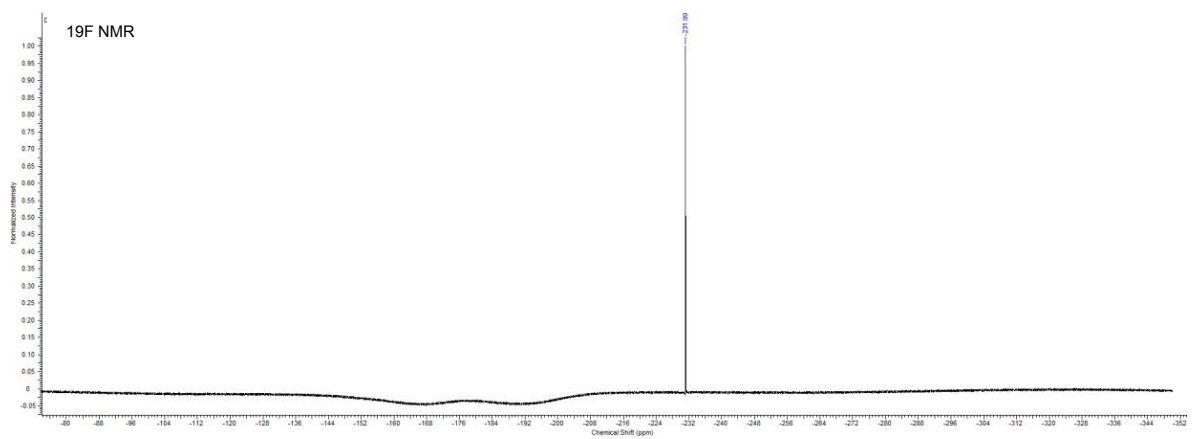

3-(4-((1-(2-Fluoroethyl)-1H-1,2,3-triazol-4-yl)methoxy)phenyl)-6-methyl-1,2,4,5-tetrazine (5)

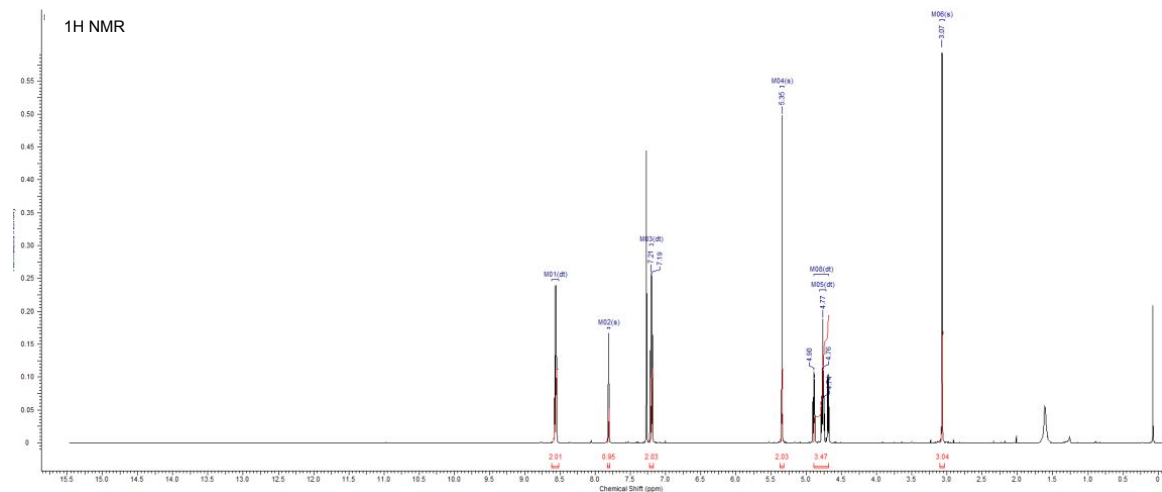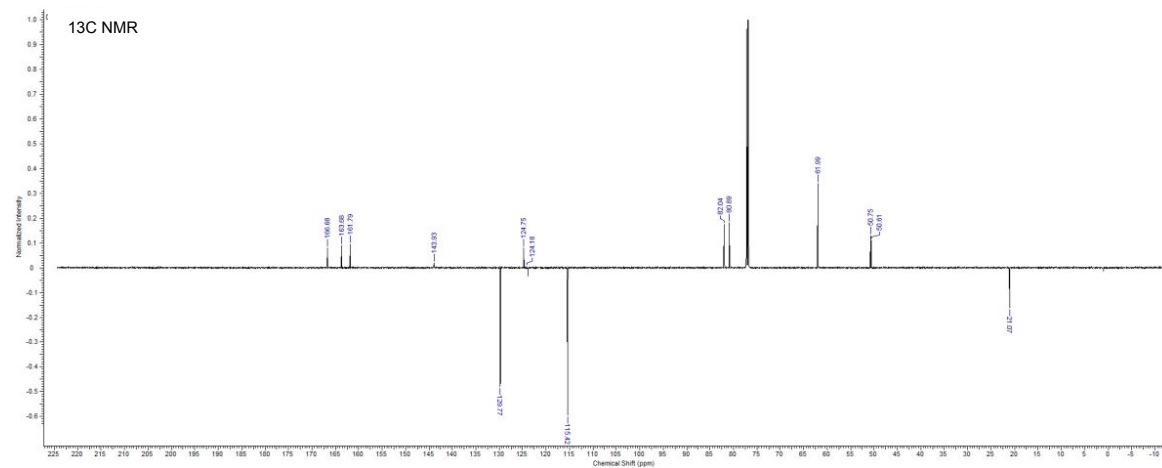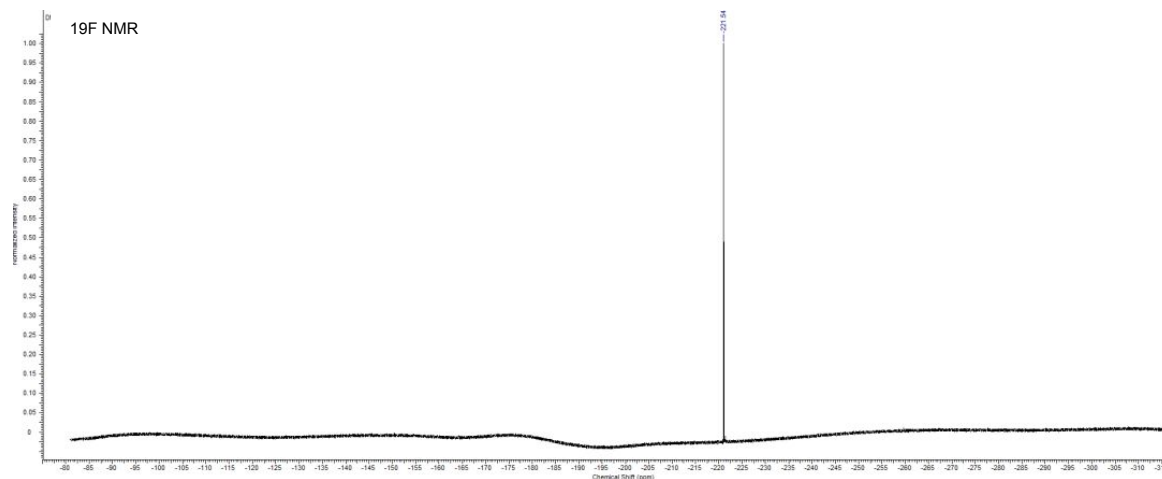

3-(4-((1-(2-(2-(2-(2-Fluoroethoxy)ethoxy)ethoxy)ethyl)-1H-1,2,3-triazol-4-yl)methoxy)phenyl)-6-methyl-1,2,4,5-tetrazine (6)

<sup>1</sup>H NMR

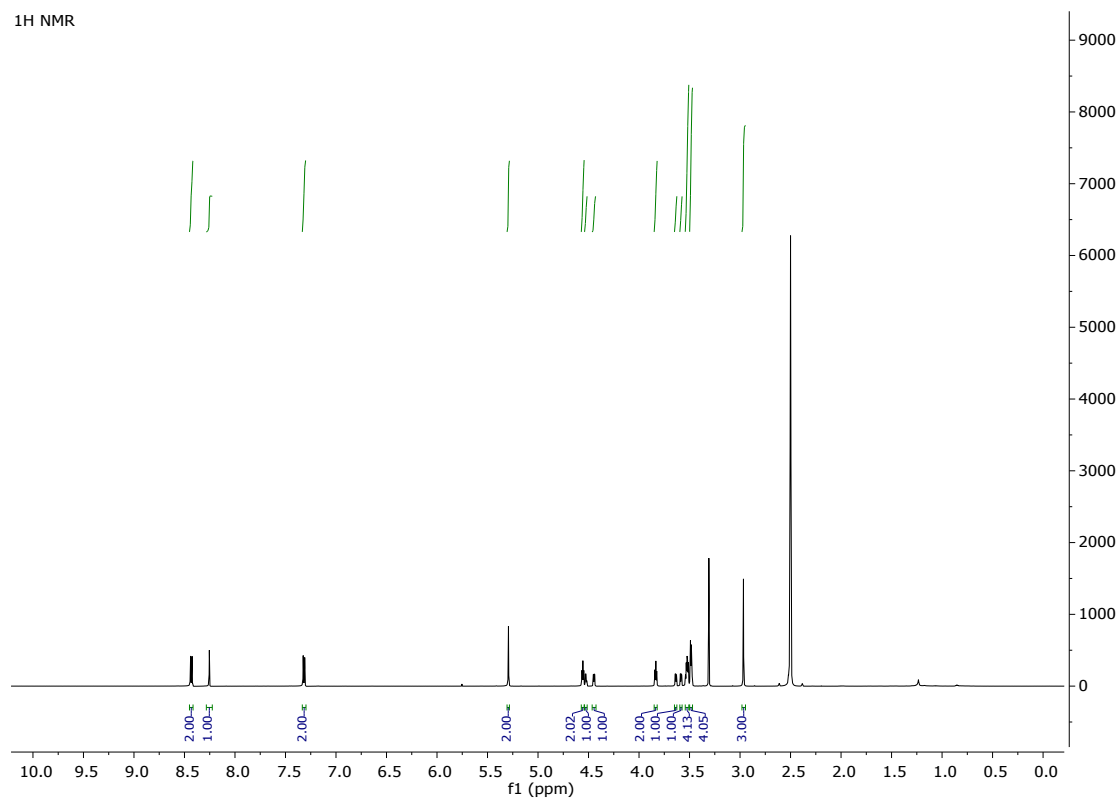

<sup>13</sup>C NMR

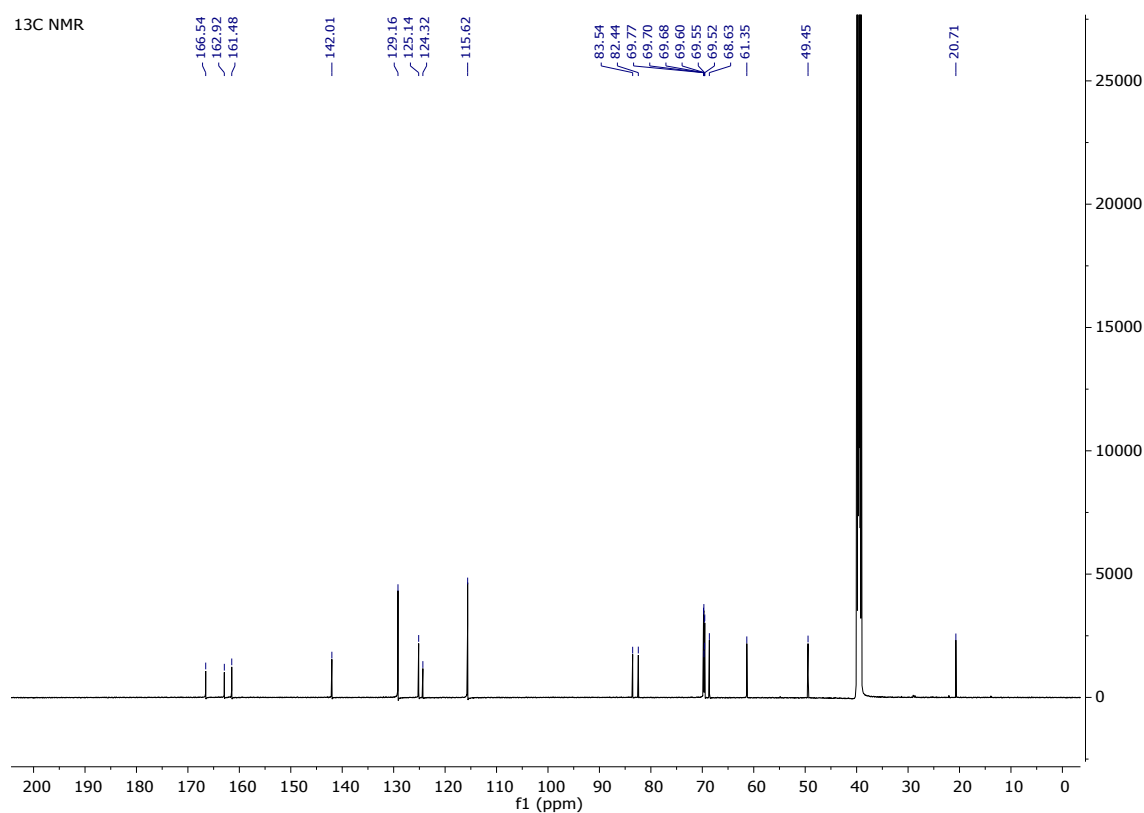

(2S,3S,4S,5R,6R)-2-(Fluoromethyl)-6-(4-((4-(6-methyl-1,2,4,5-tetrazin-3-yl)phenoxy)methyl)-1H-1,2,3-triazol-1-yl)tetrahydro-2H-pyran-3,4,5-triol (7)

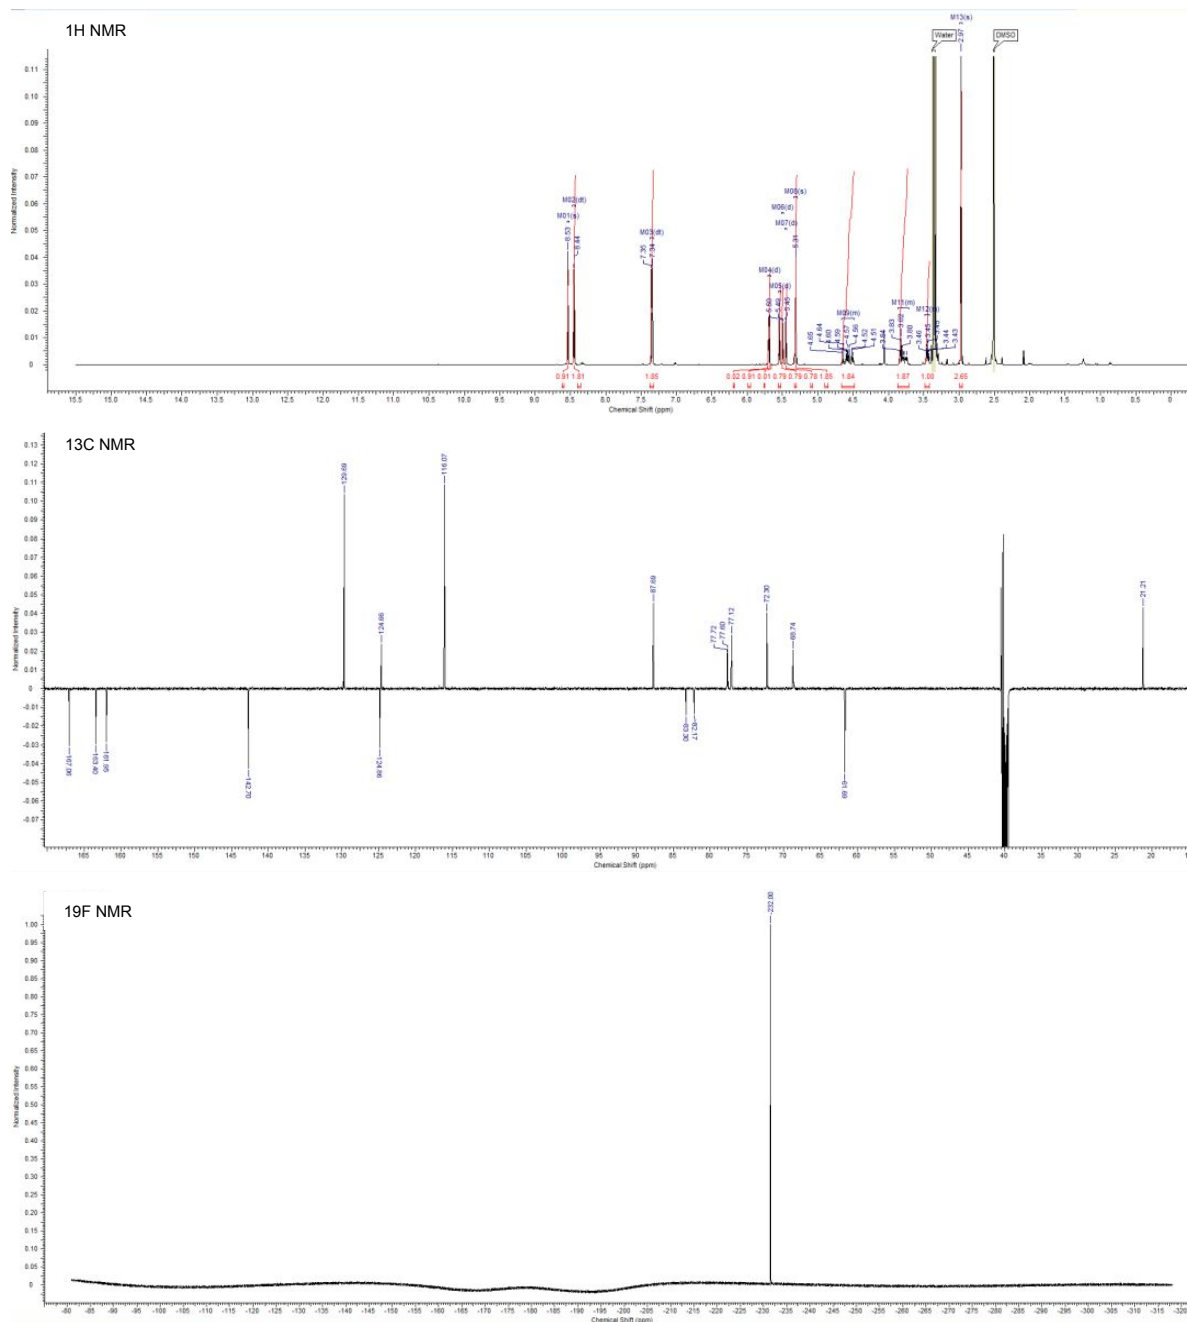

*2,2',2''-(10-(14-(4-(6-methyl-1,2,4,5-tetrazin-3-yl)phenoxy)-2-oxo-6,9,12-trioxa-3-azatetradecyl)-1,4,7,10-tetraazacyclododecane-1,4,7-triyl)triacetic acid (10)*

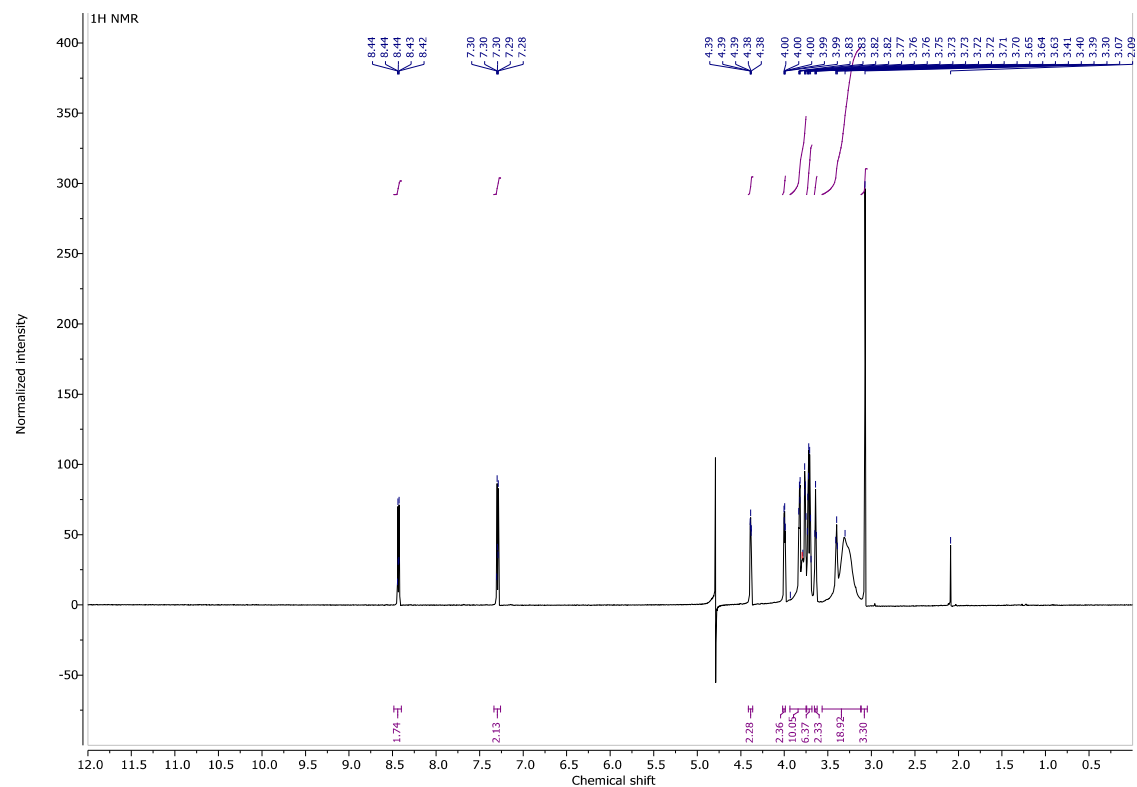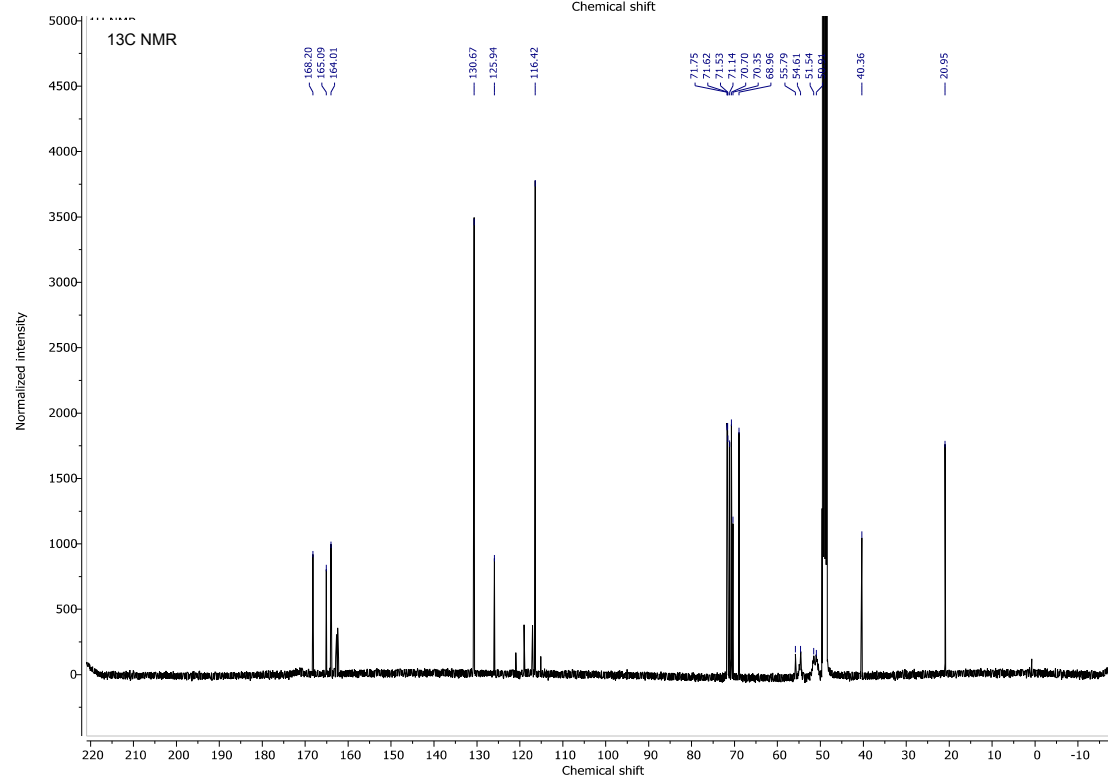



3-(4-((1-(2-Fluoroethyl)-1H-1,2,3-triazol-4-yl)methoxy)phenyl)-6-(pyridin-2-yl)-1,2,4,5-tetrazine (12)

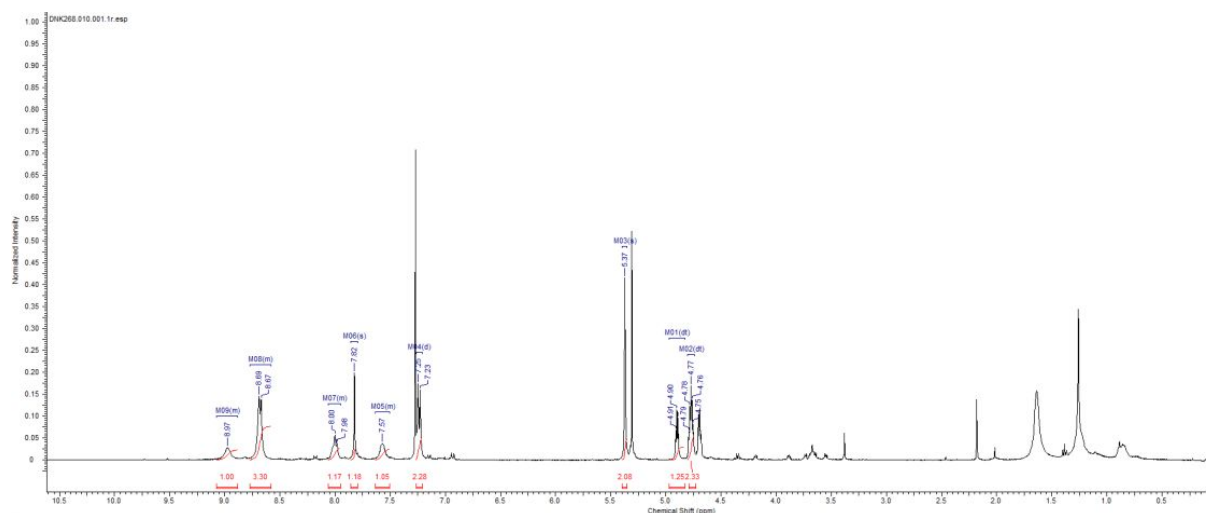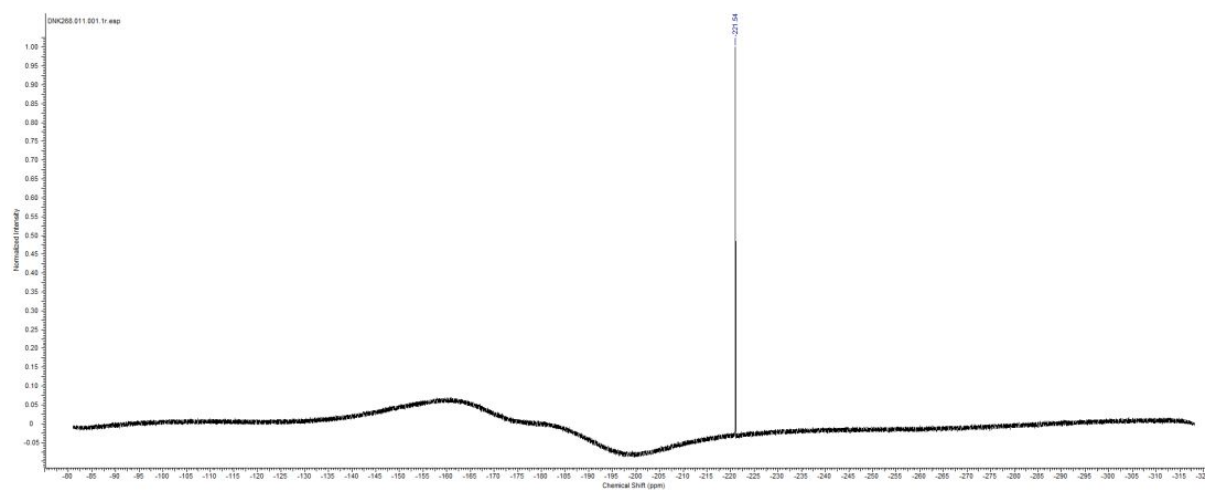

3-(4-((1-(2-(2-(2-(2-Fluoroethoxy)ethoxy)ethoxy)ethyl)-1H-1,2,3-triazol-4-yl)methoxy)phenyl)-6-(pyridin-2-yl)-1,2,4,5-tetrazine (13)

<sup>1</sup>H NMR

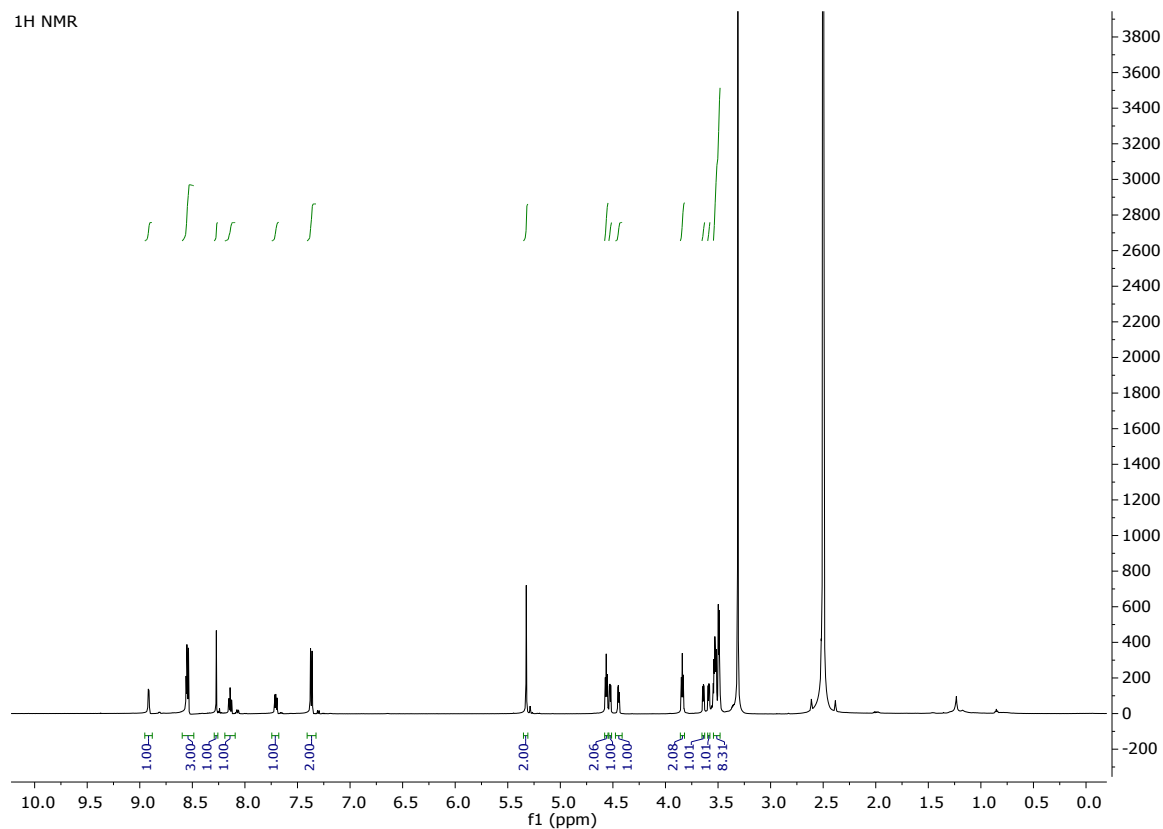

<sup>13</sup>C NMR

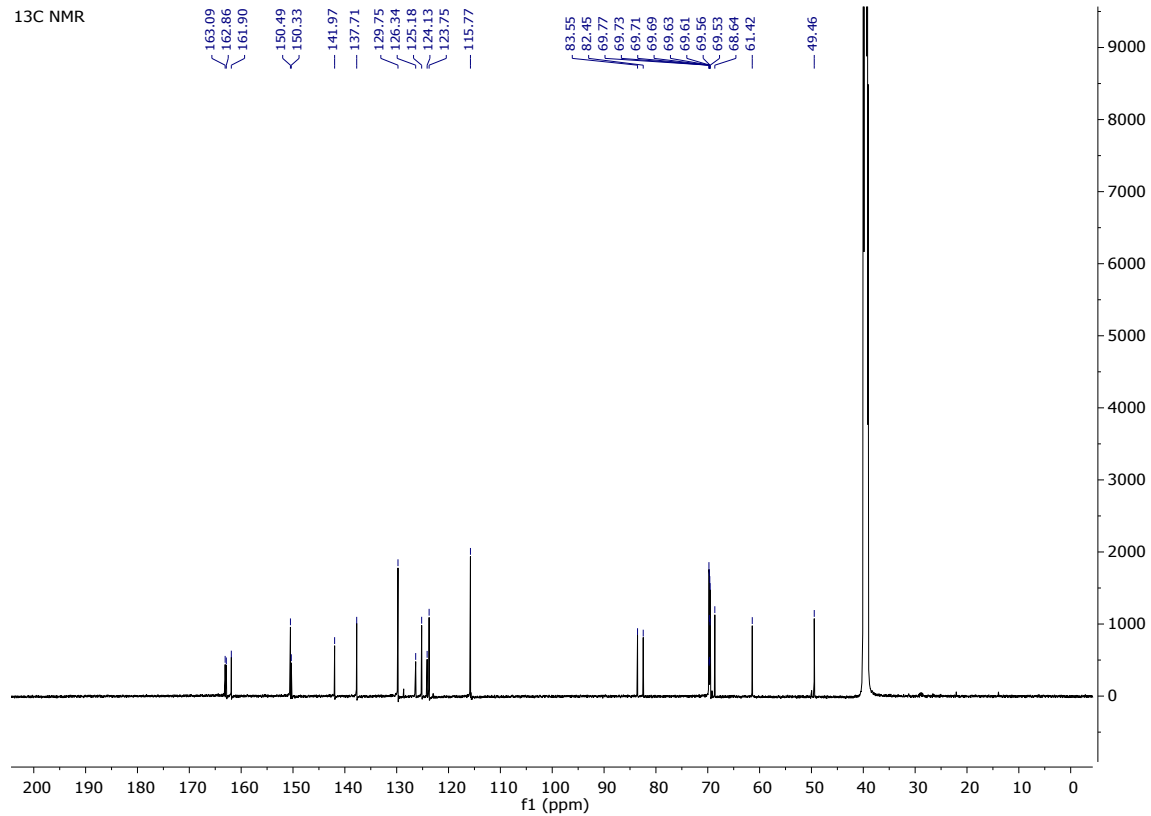

(2*S*,3*S*,4*S*,5*R*,6*R*)-2-(Fluoromethyl)-6-(4-((4-(6-(pyridin-2-yl)-1,2,4,5-tetrazin-3-yl)phenoxy)methyl)-1*H*-1,2,3-triazol-1-yl)tetrahydro-2*H*-pyran-3,4,5-triol (**14**)

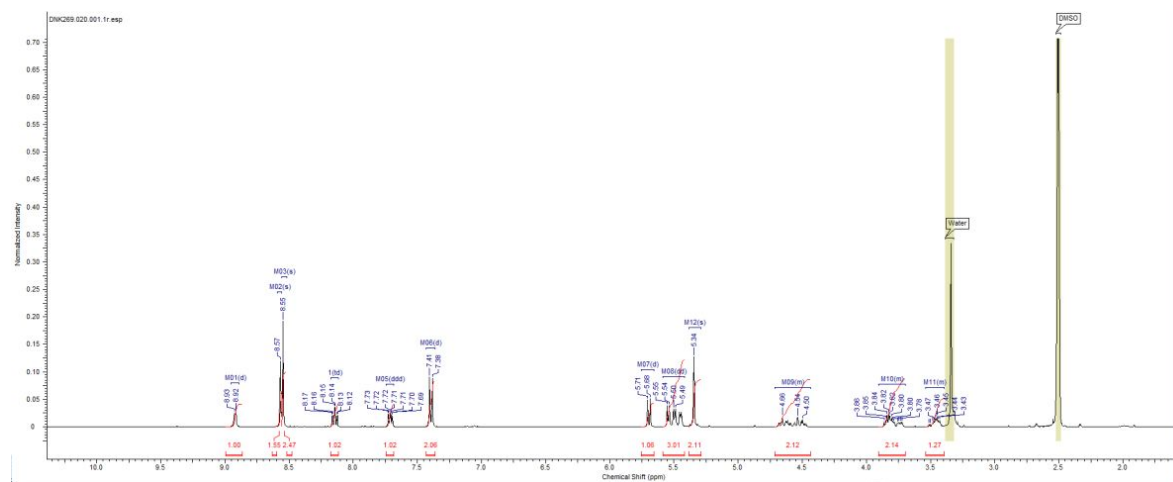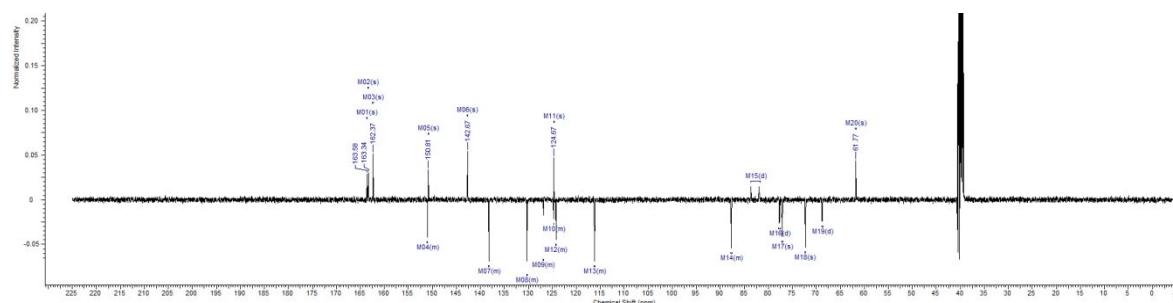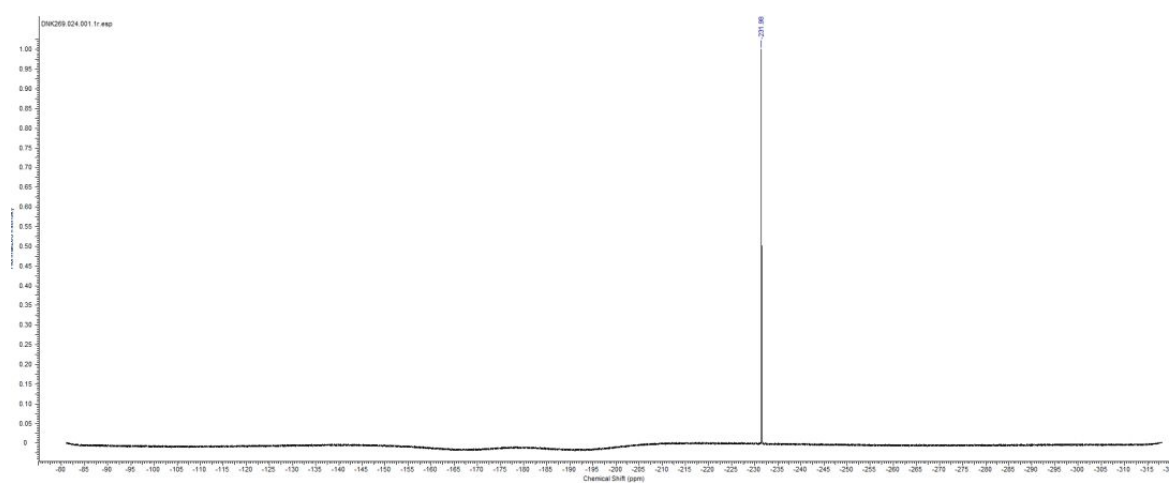

2-(4-(6-(Pyridin-2-yl)-1,2,4,5-tetrazin-3-yl)phenoxy)acetic acid (15)

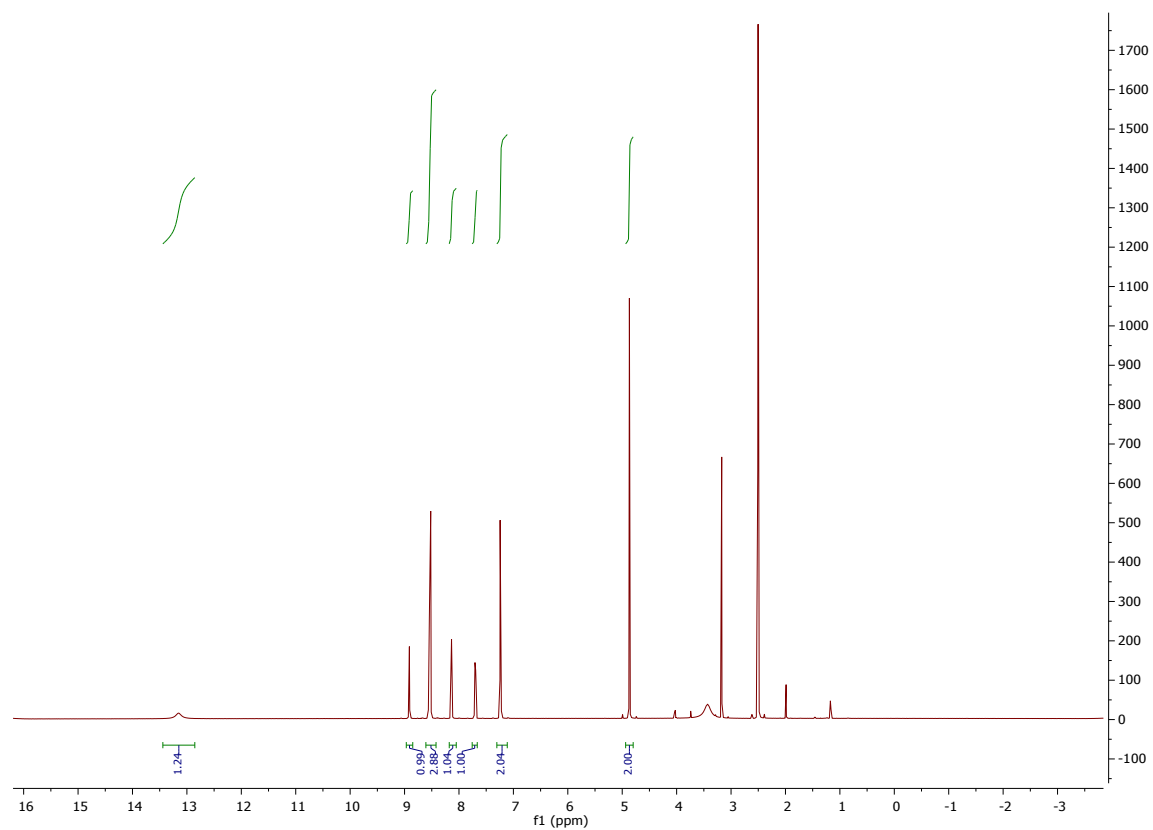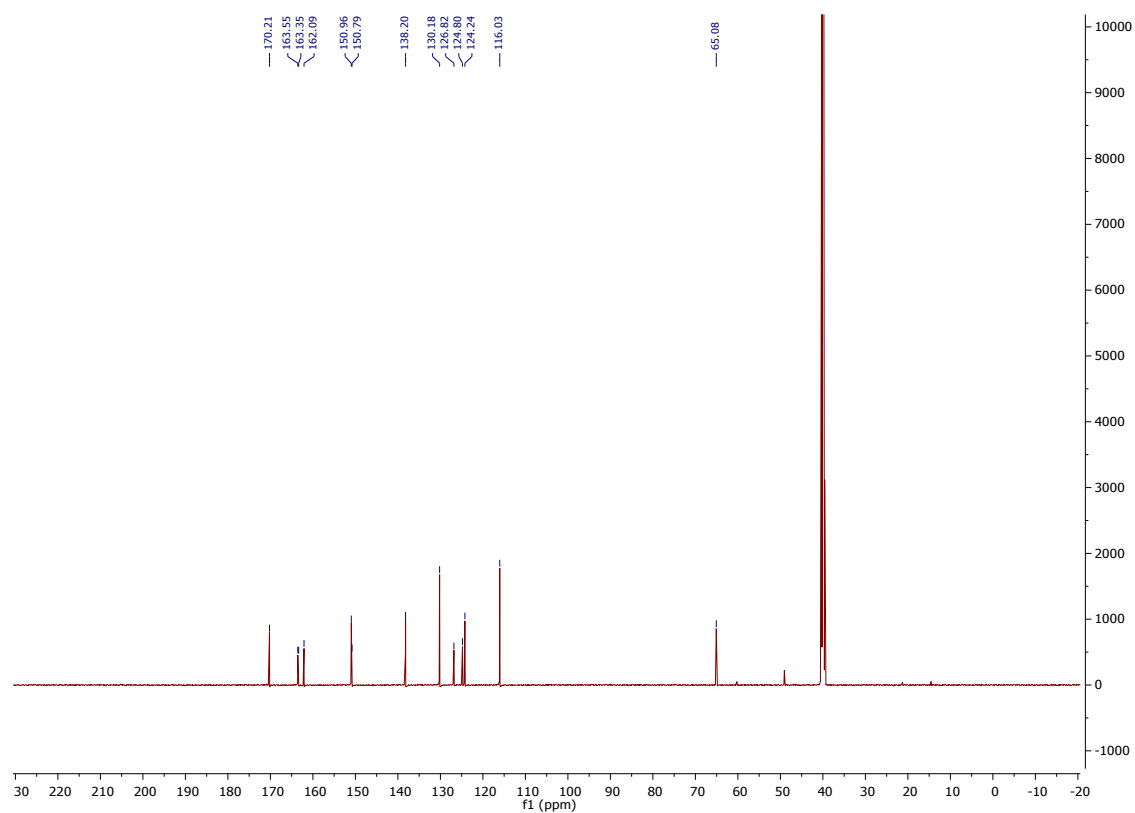

2,2'-((2-(4-(6-(Pyridin-2-yl)-1,2,4,5-tetrazin-3-yl)phenoxy)acetyl)azanediyl)diacetic acid (**16**)

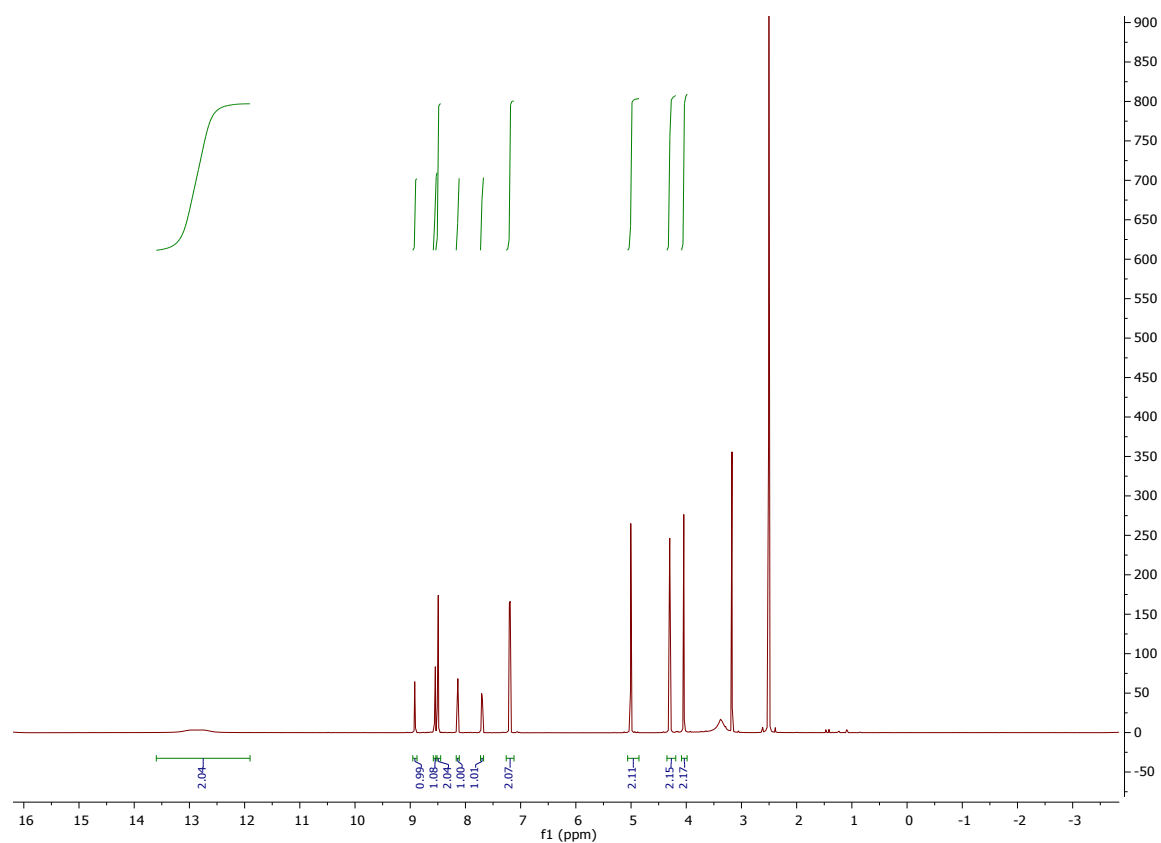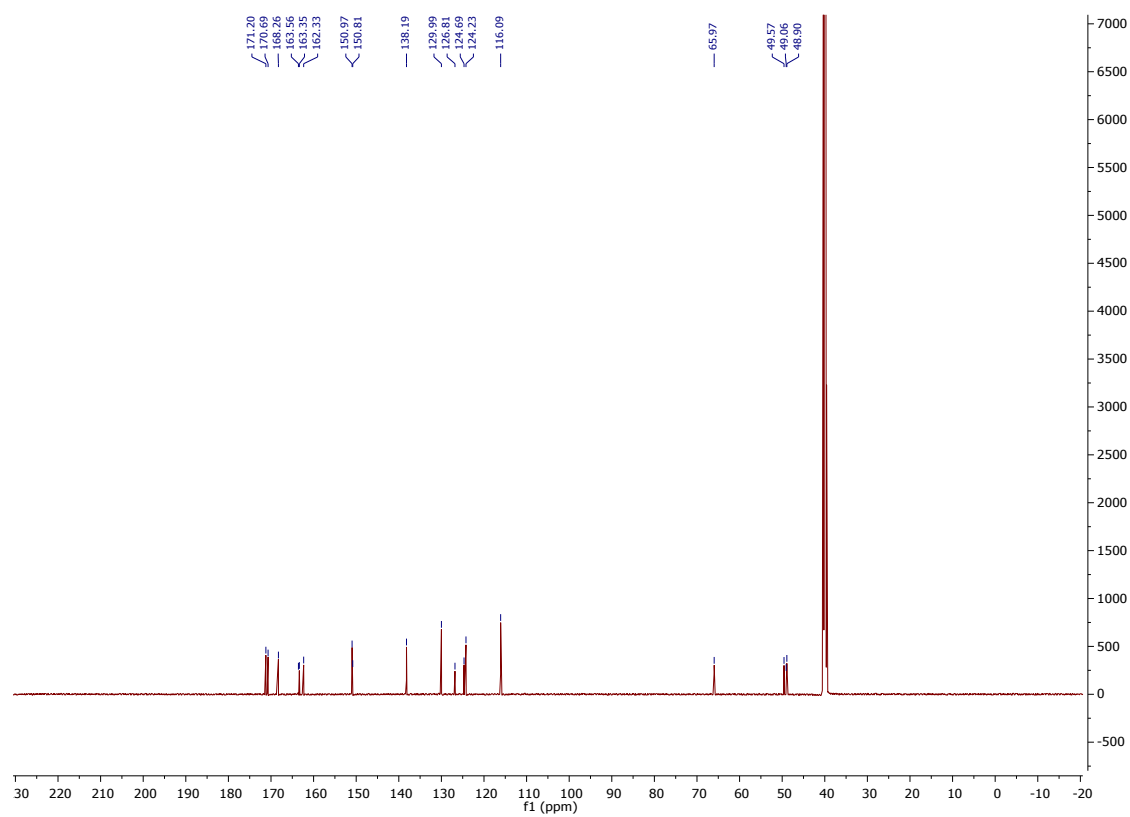

3-(4-(1-(2-Fluoroethyl)-1H-1,2,3-triazol-4-yl)phenyl)-1,2,4,5-tetrazine (17)

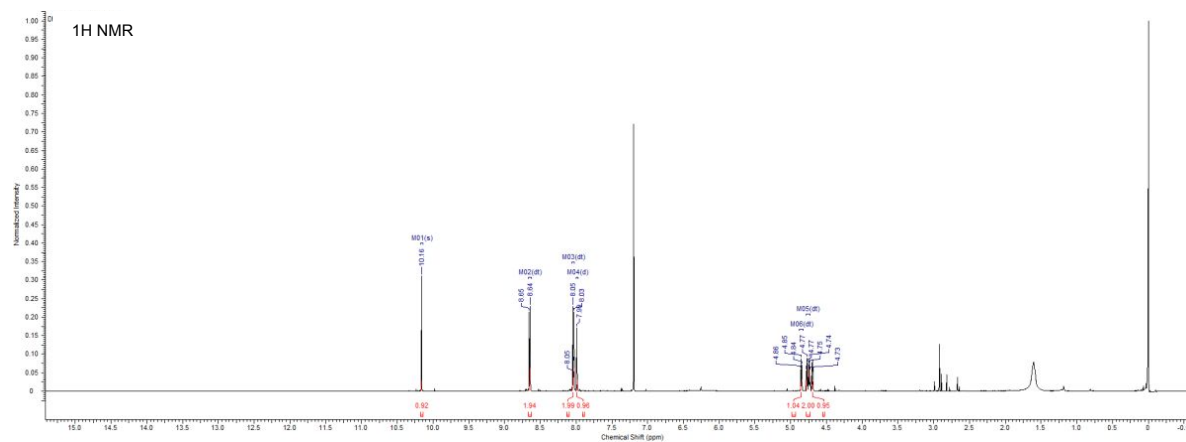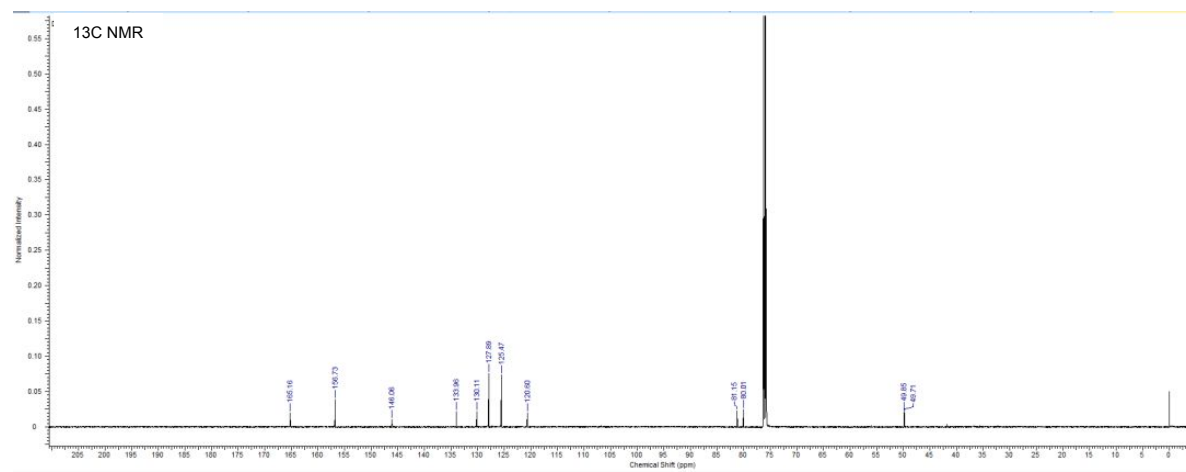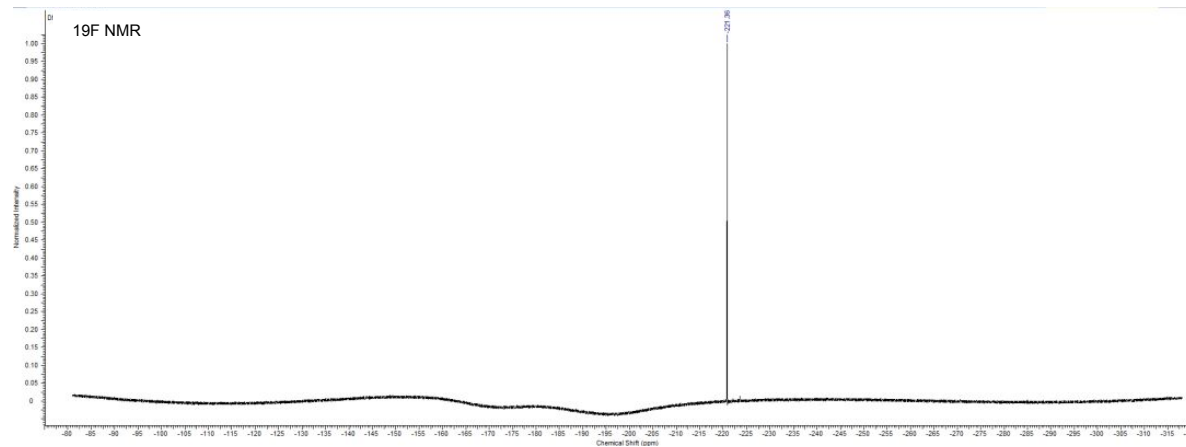

*3-(4-(1-(2-(2-(2-(2-fluoroethoxy)ethoxy)ethoxy)ethyl)-1H-1,2,3-triazol-4-yl)phenyl)-1,2,4,5-tetrazine*  
**(18)**

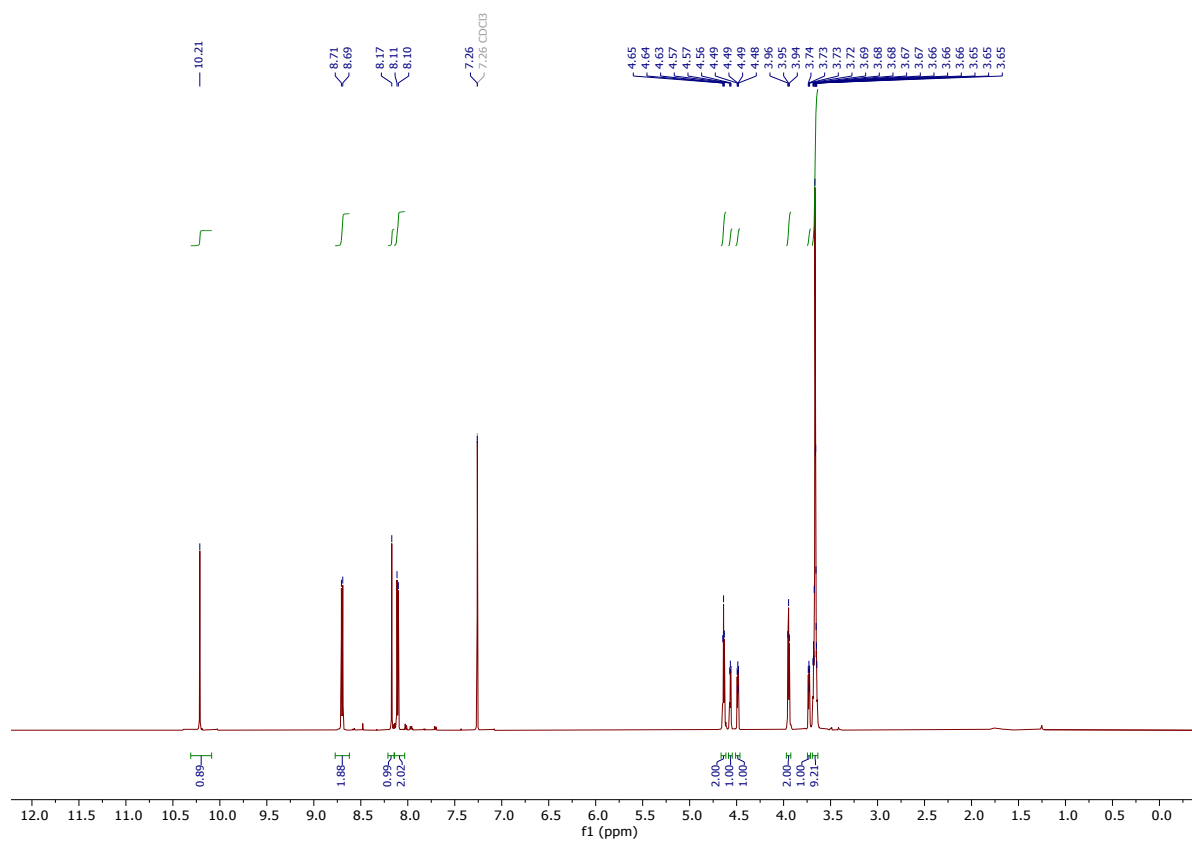

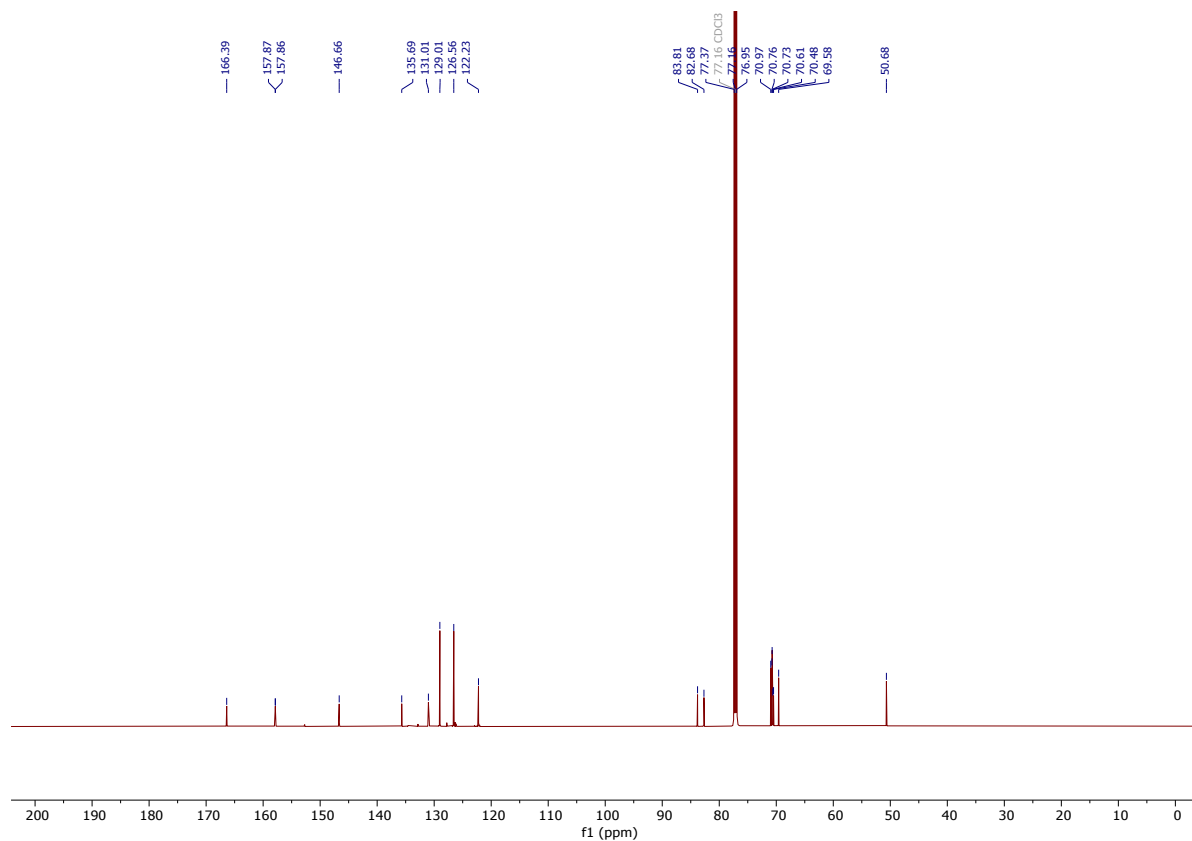

(2R,3R,4S,5S,6S)-2-(4-(4-(1,2,4,5-Tetrazin-3-yl)phenyl)-1H-1,2,3-triazol-1-yl)-6-(fluoromethyl)tetrahydro-2H-pyran-3,4,5-triol (**19**)

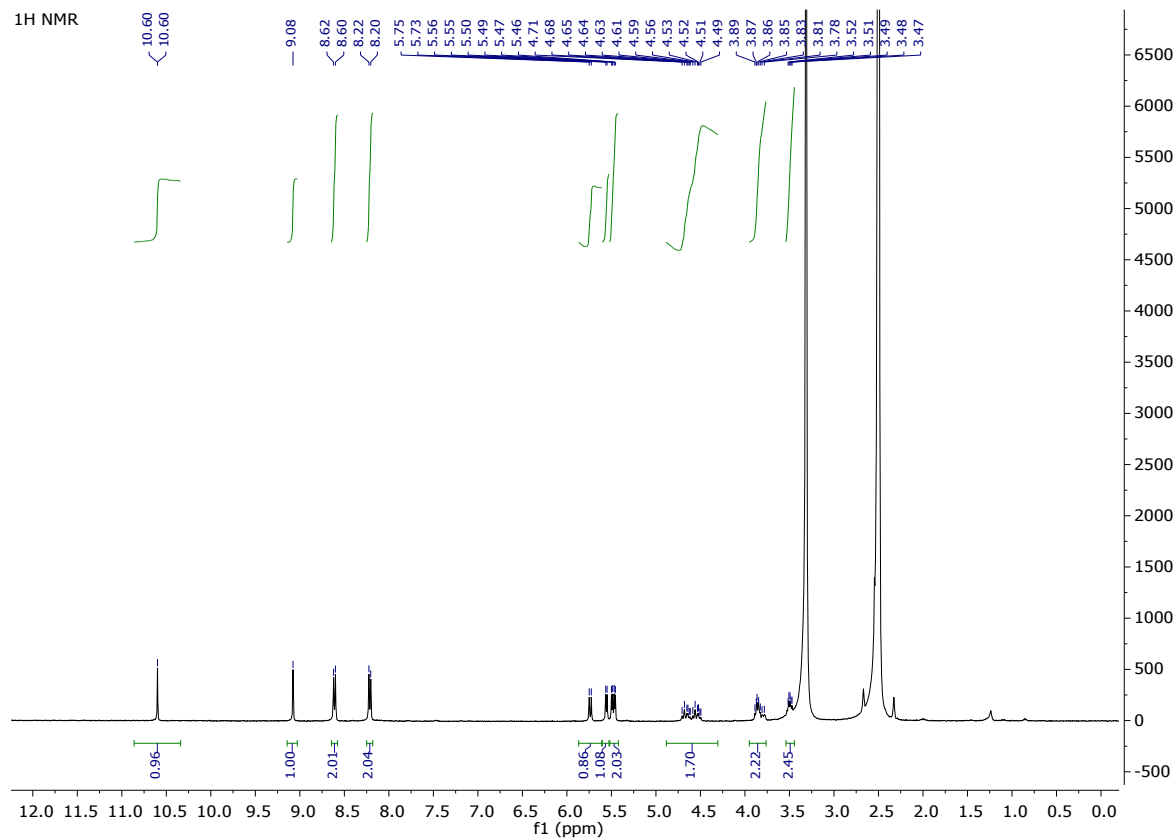



19F NMR

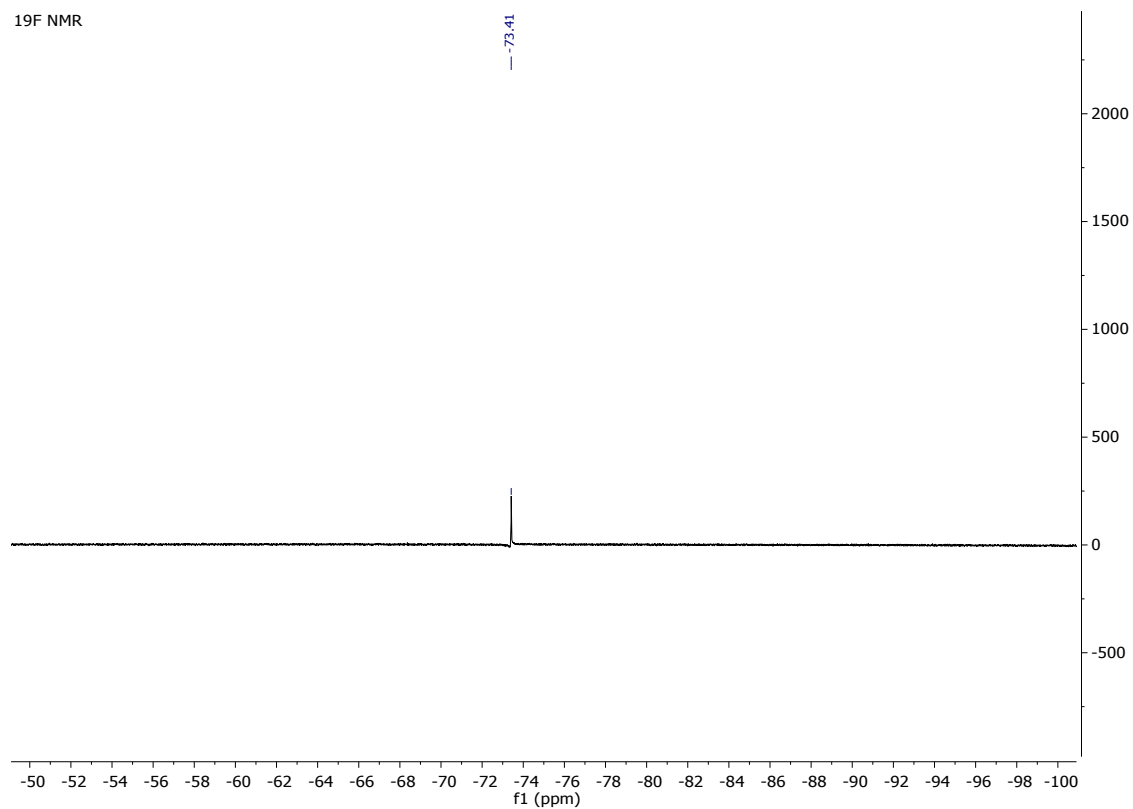

*N*-(2-Hydroxyethyl)-4-(6-(pyrimidin-2-yl)-1,2,4,5-tetrazin-3-yl)benzamide (**23**)

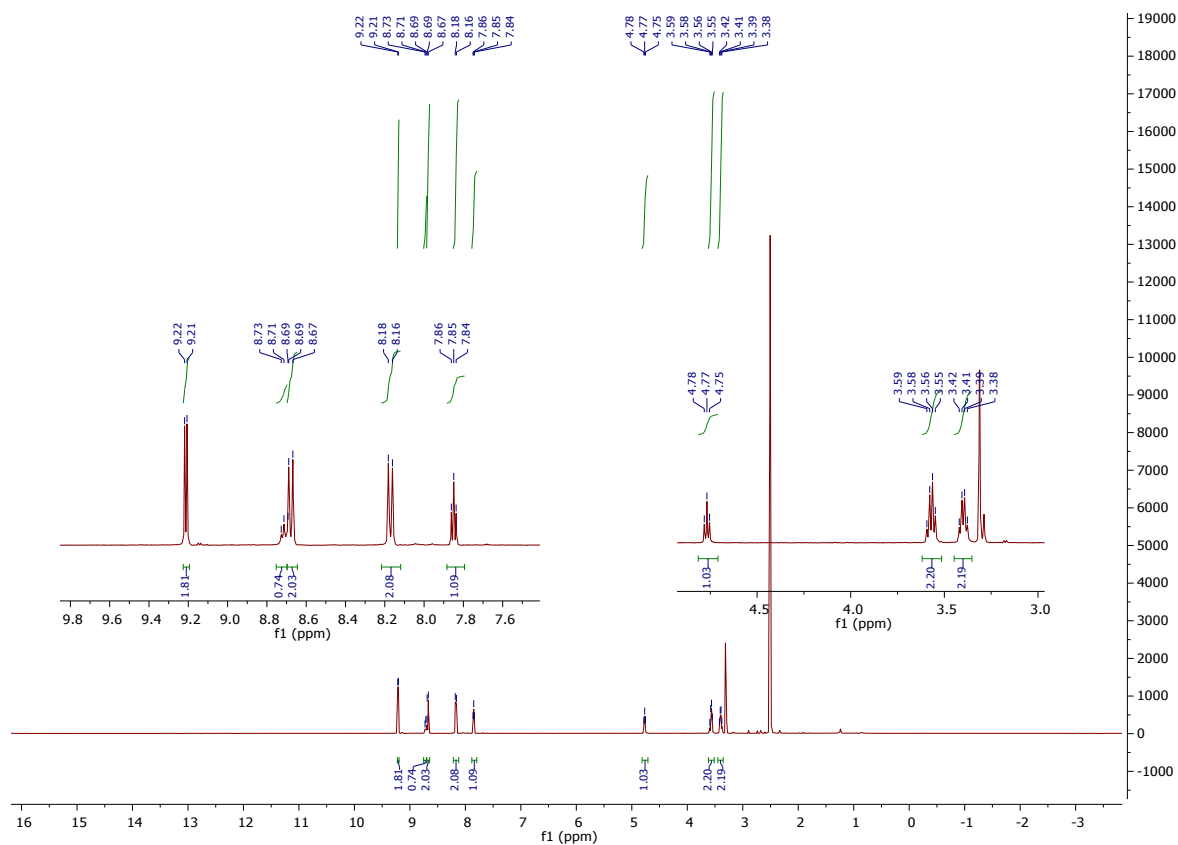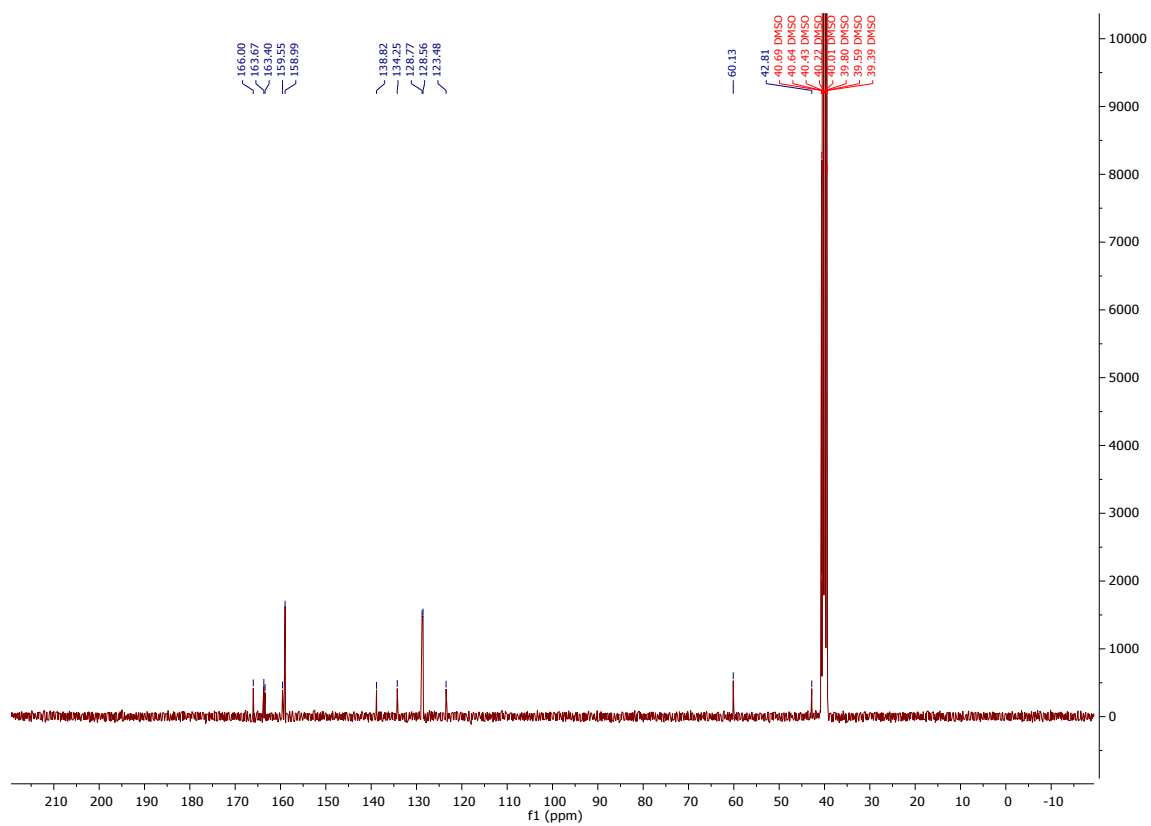

2,2'-(7-(21-Carboxy-1,18-dioxo-1-(4-(6-(pyrimidin-2-yl)-1,2,4,5-tetrazin-3-yl) phenyl)-5,8,11,14-tetraoxa-2,17-diazahenicosan-21-yl)-1,4,7-triazonane-1,4-diyl) diacetic acid (**24**)

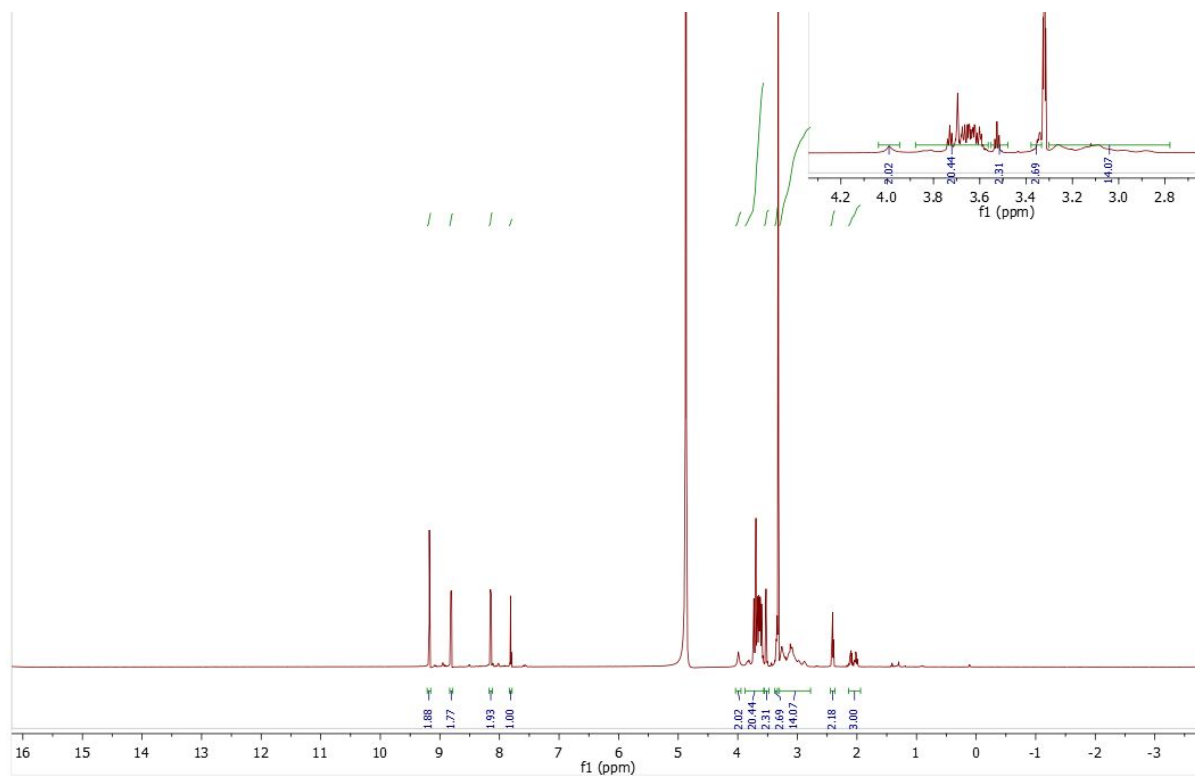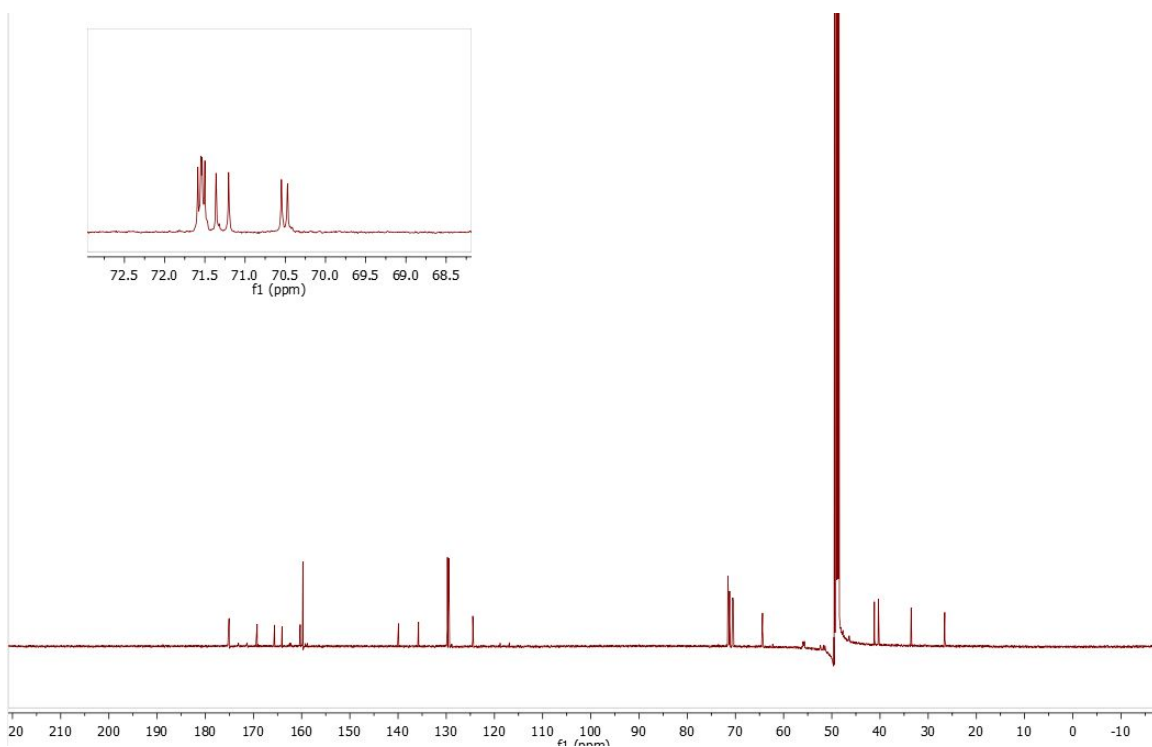

4-(1-(2-Fluoroethyl)-1H-1,2,3-triazol-4-yl)-N-(6-(6-(pyridin-2-yl)-1,2,4,5-tetrazin-3-yl)pyridin-3-yl)benzamide (25)

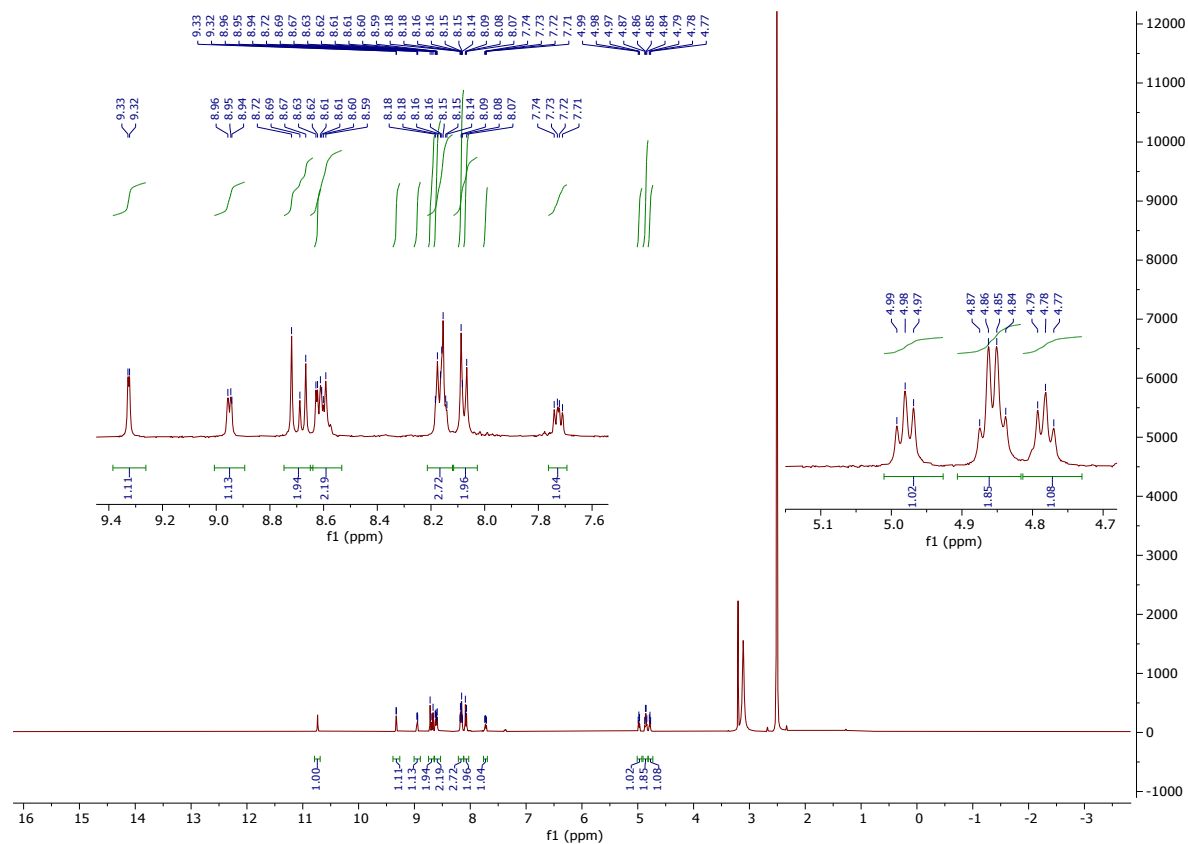

4-(1-(2-(2-(2-(2-Fluoroethoxy)ethoxy)ethoxy)ethyl)-1H-1,2,3-triazol-4-yl)-N-(6-(6-(pyridin-2-yl)-1,2,4,5-tetrazin-3-yl)pyridin-3-yl)benzamide (26)

<sup>1</sup>H NMR

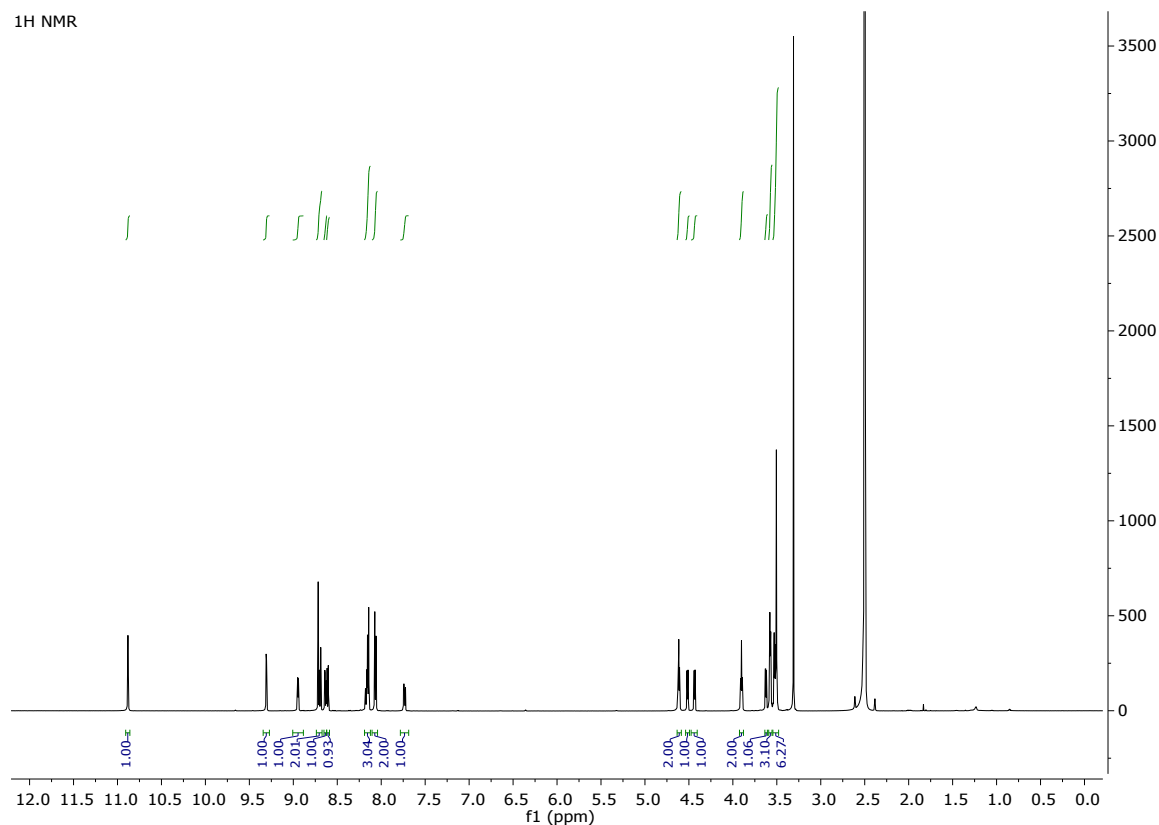

<sup>13</sup>C NMR

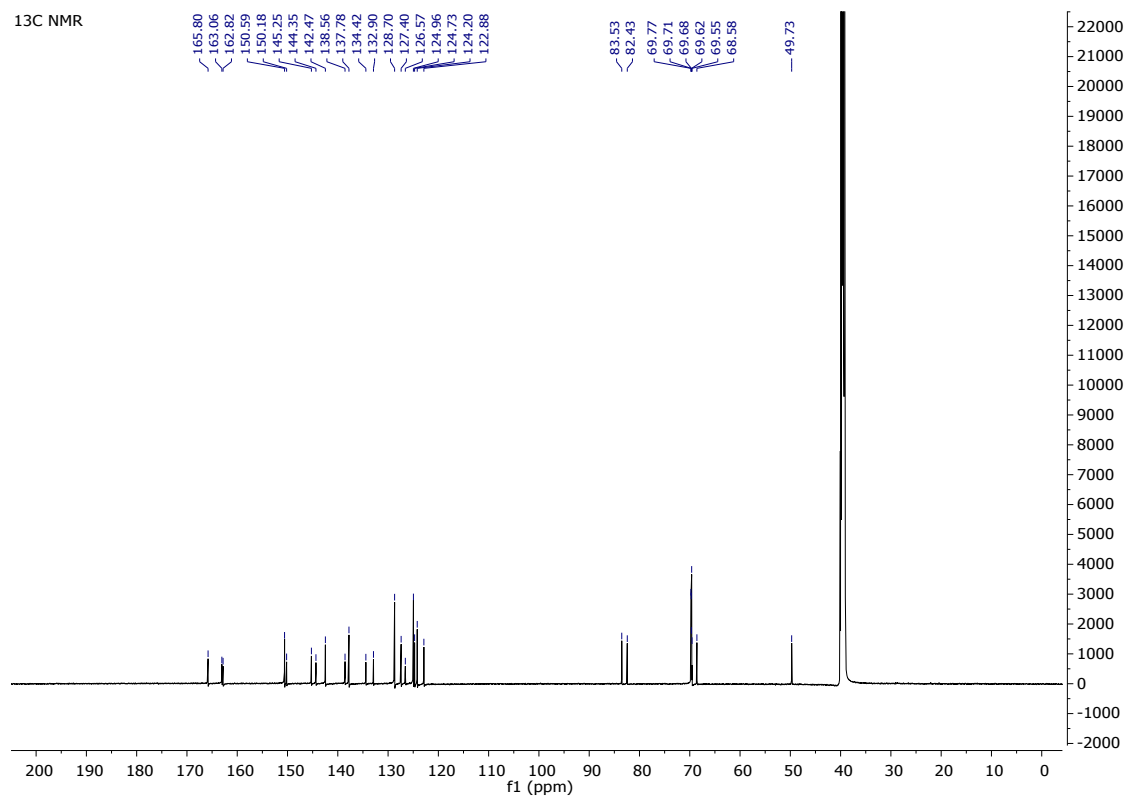

4-(1-((2R,3R,4S,5S,6S)-6-(fluoromethyl)-3,4,5-trihydroxytetrahydro-2H-pyran-2-yl)-1H-1,2,3-triazol-4-yl)-N-(6-(6-(pyridin-2-yl)-1,2,4,5-tetrazin-3-yl)pyridin-3-yl)benzamide (27)

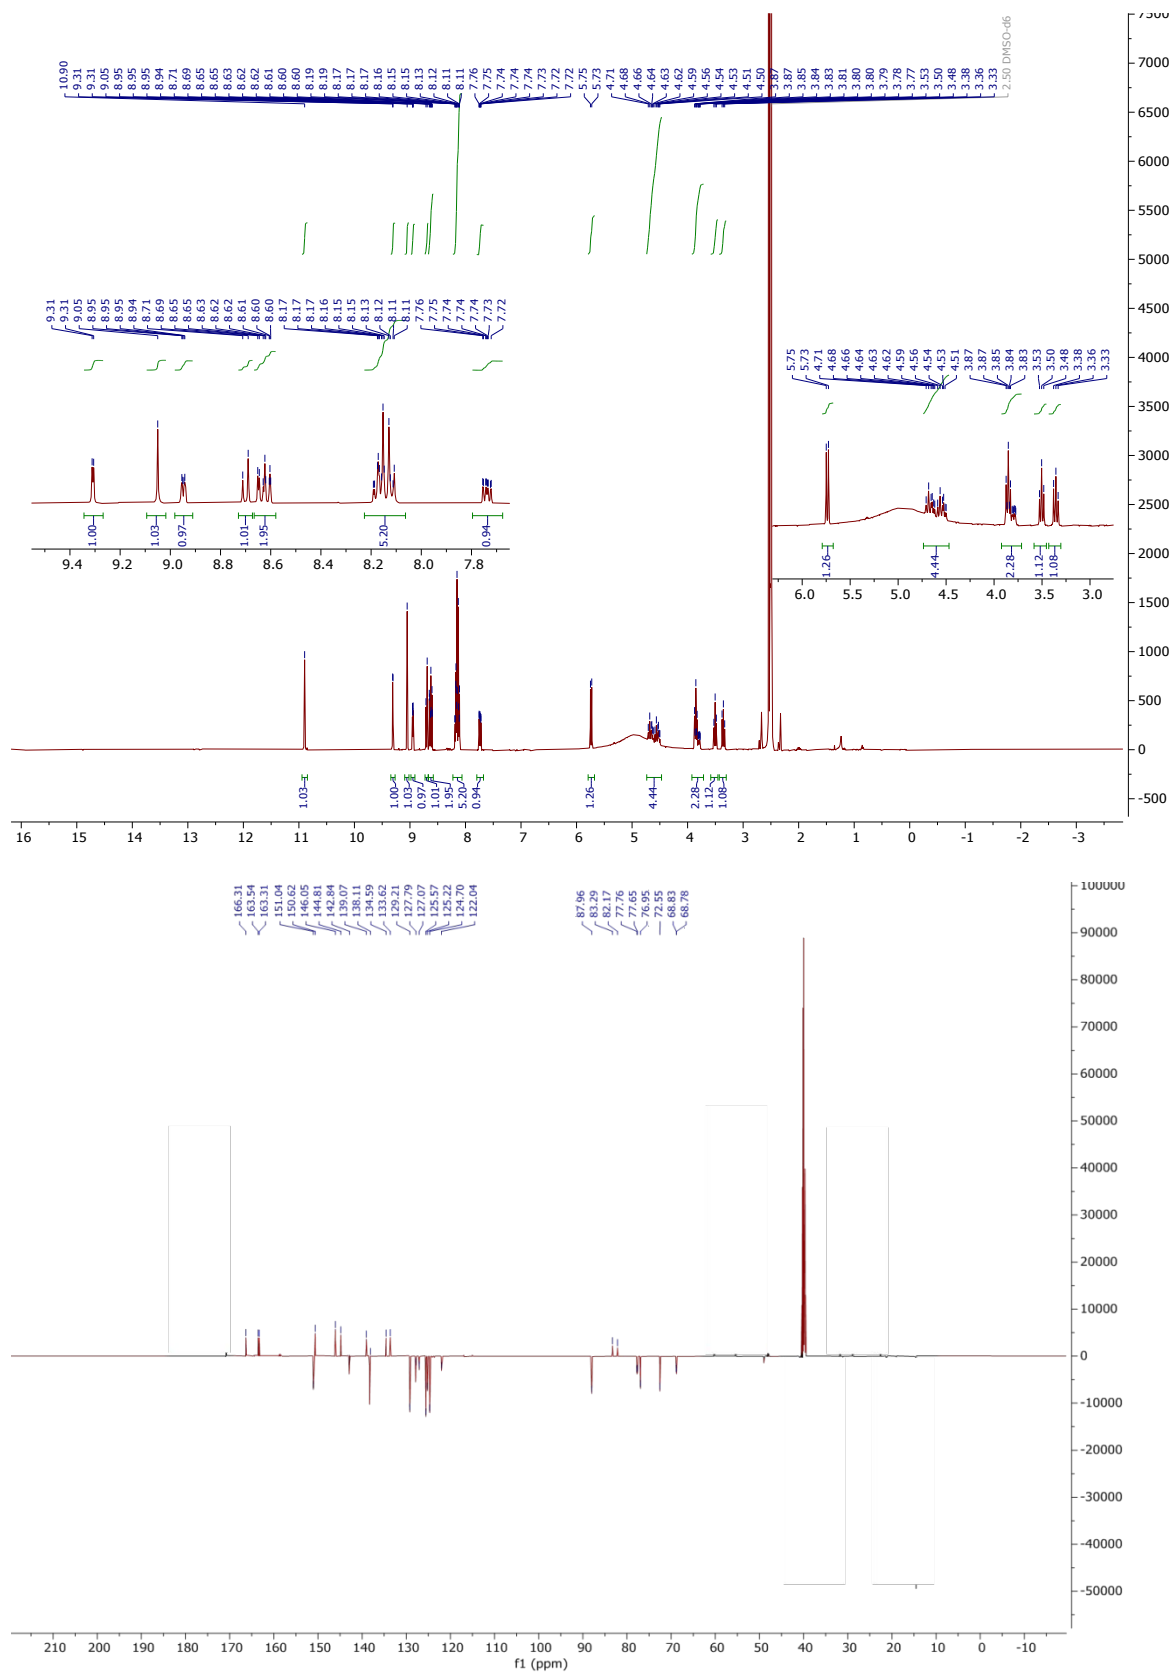

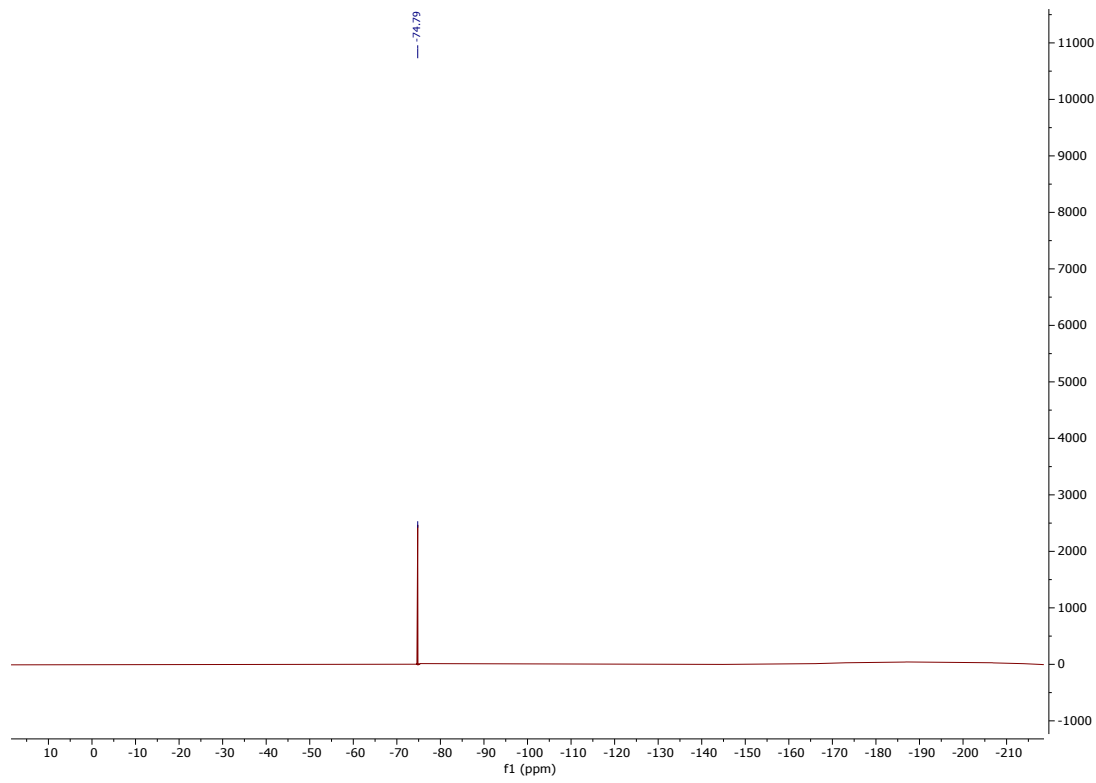

*Tert-butyl 4-(1,2,4,5-tetrazin-3-yl)benzylcarbamate (28)*

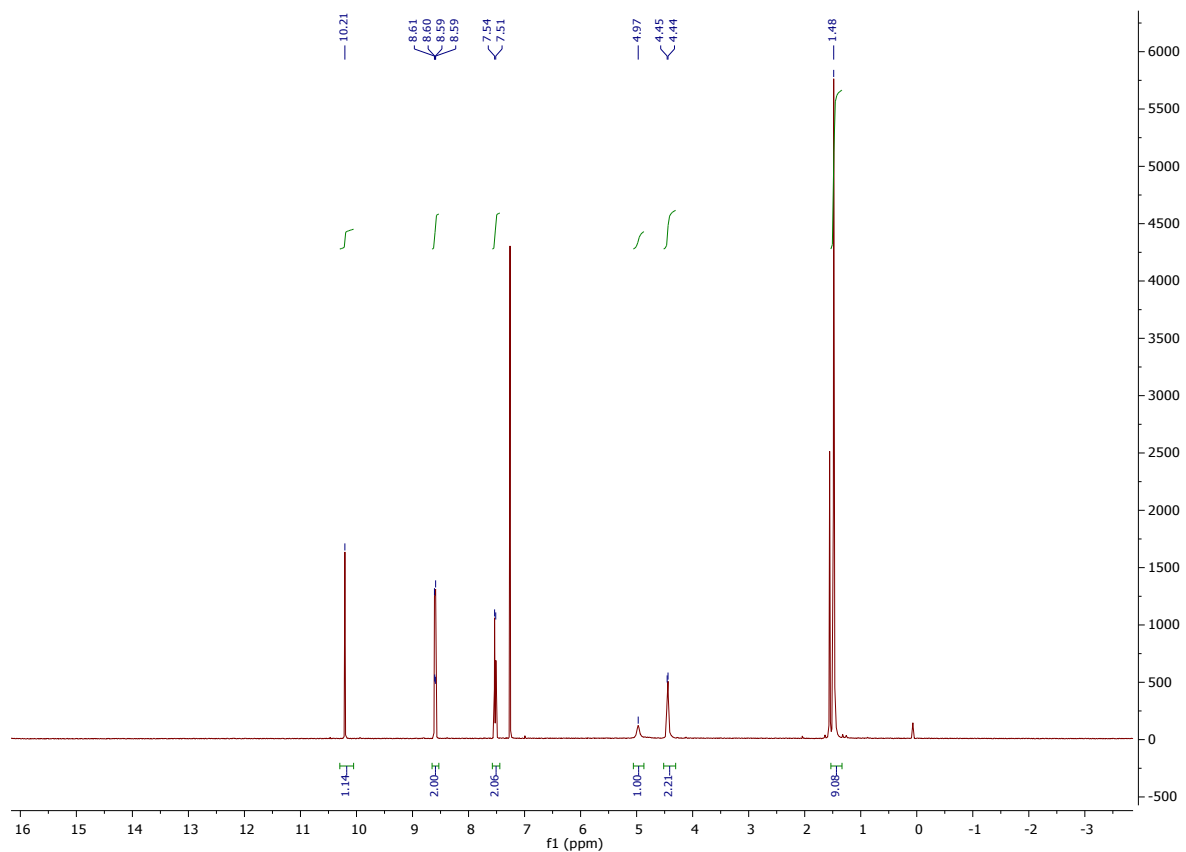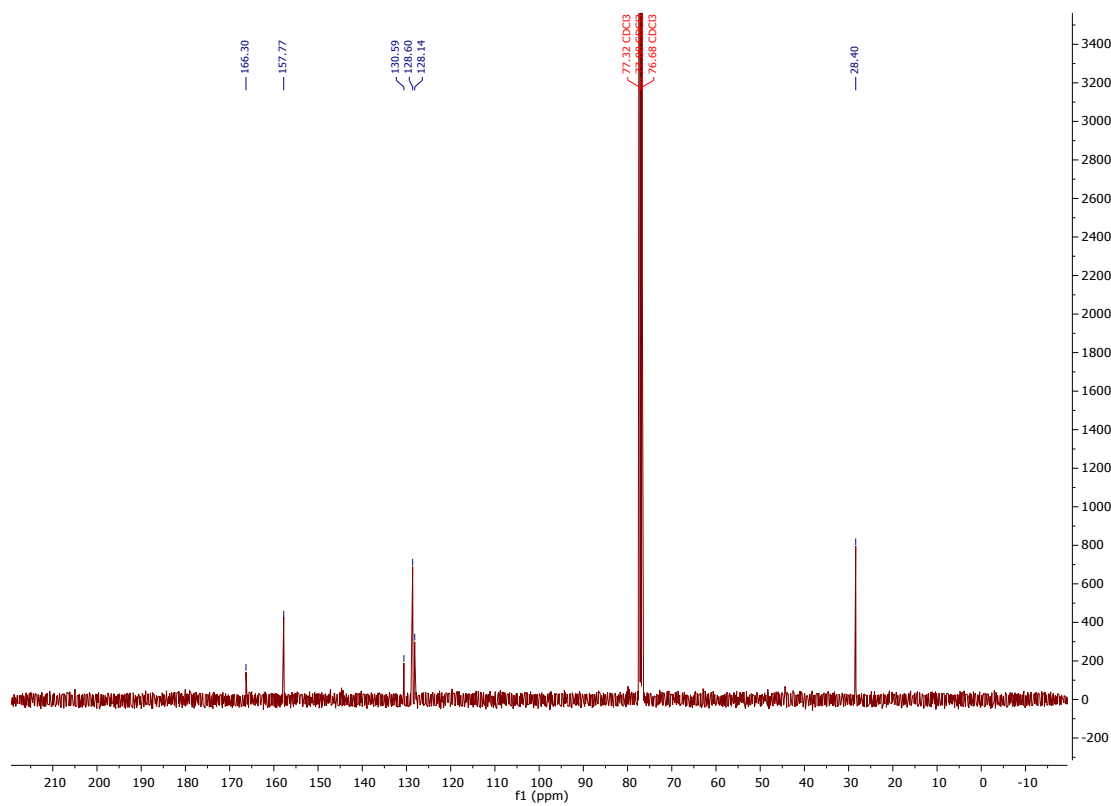



2-(4-(1,2,4,5-Tetrazin-3-yl)phenyl)-N-(2-fluoroethyl)acetamide (29)

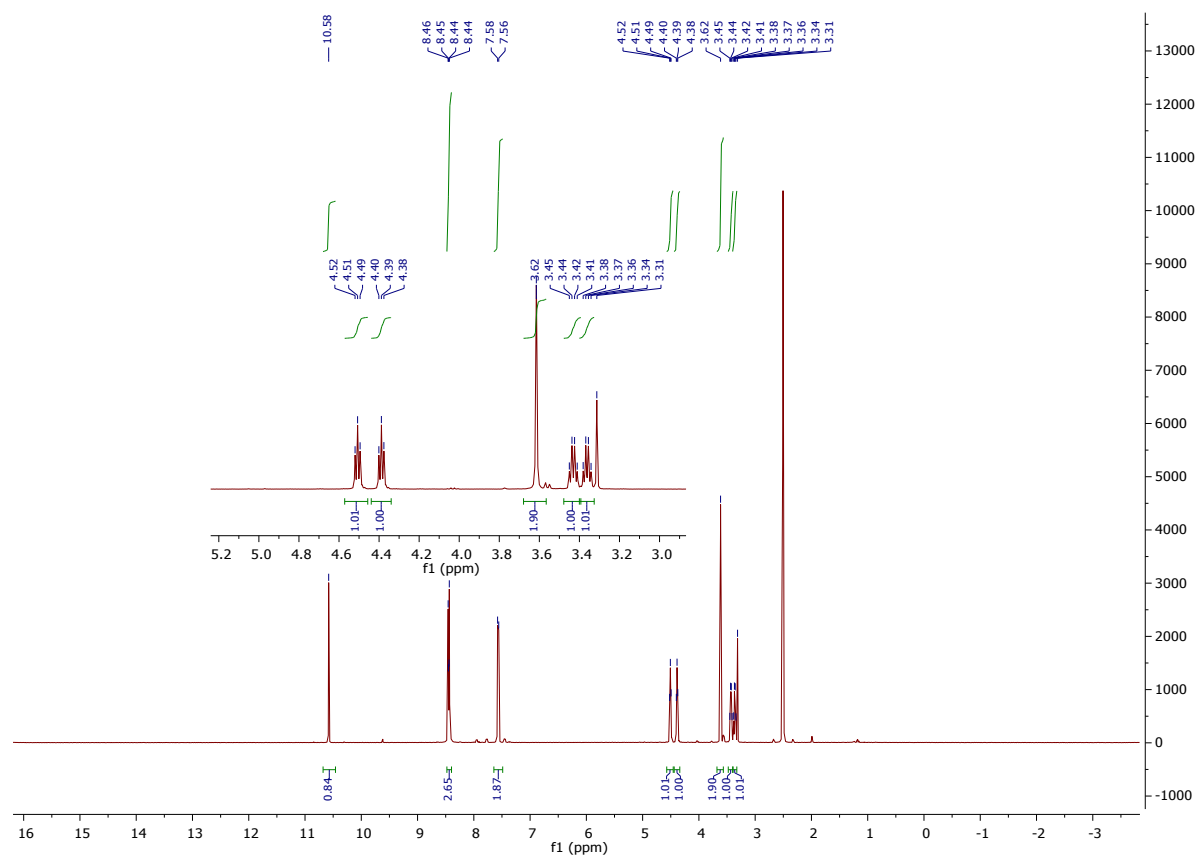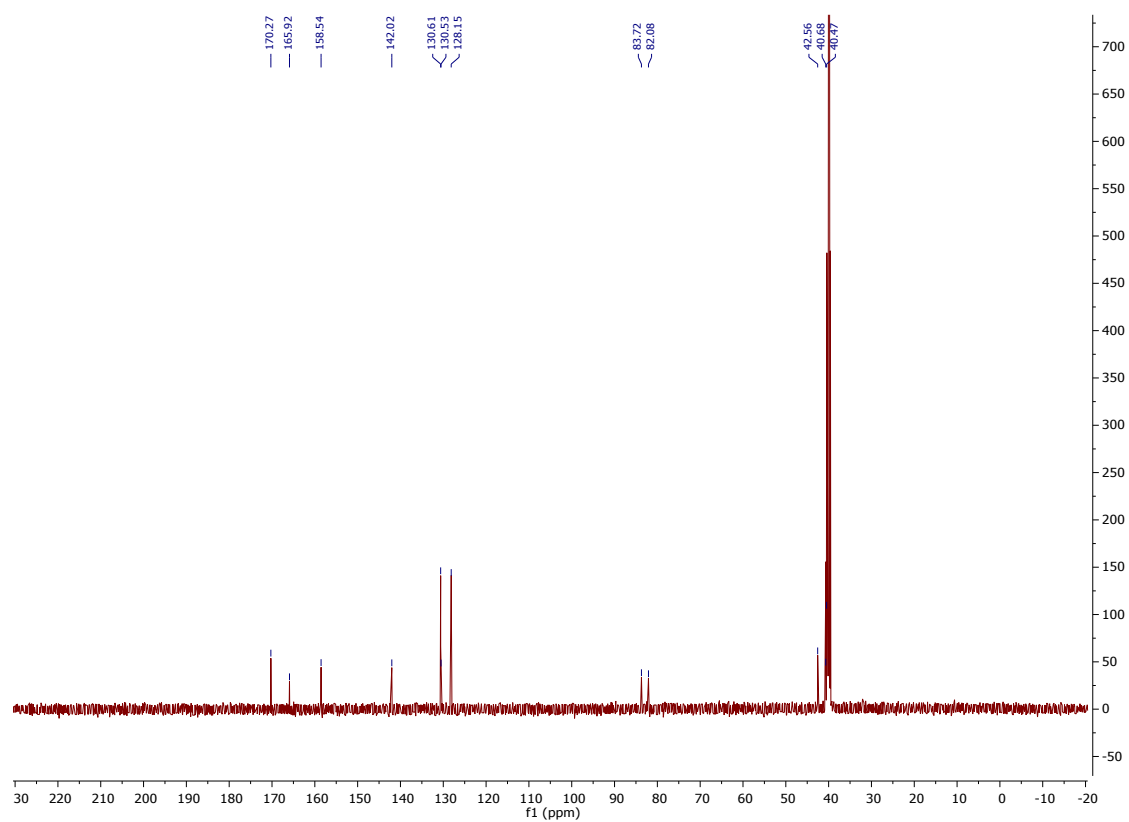

*N*-(4-(1,2,4,5-Tetrazin-3-yl)benzyl)-2-fluoroethanamine hydrochloride (30)

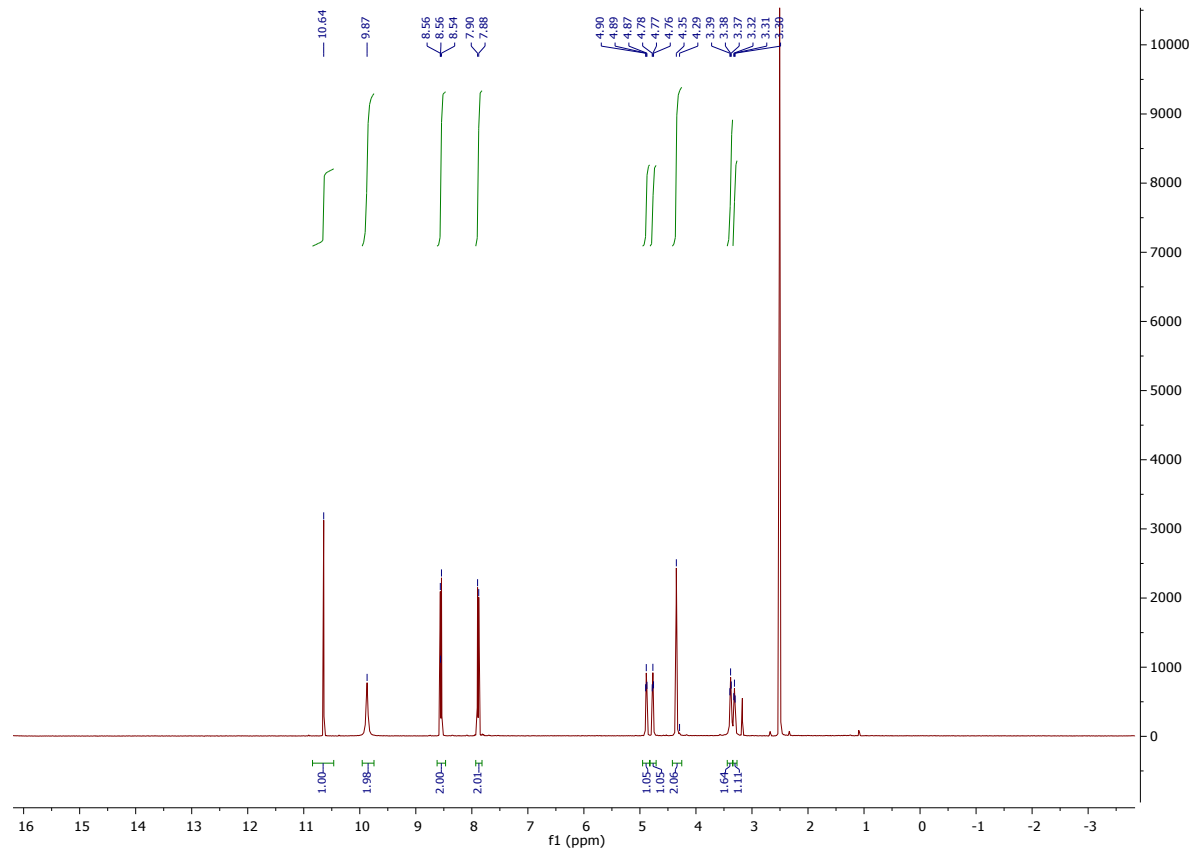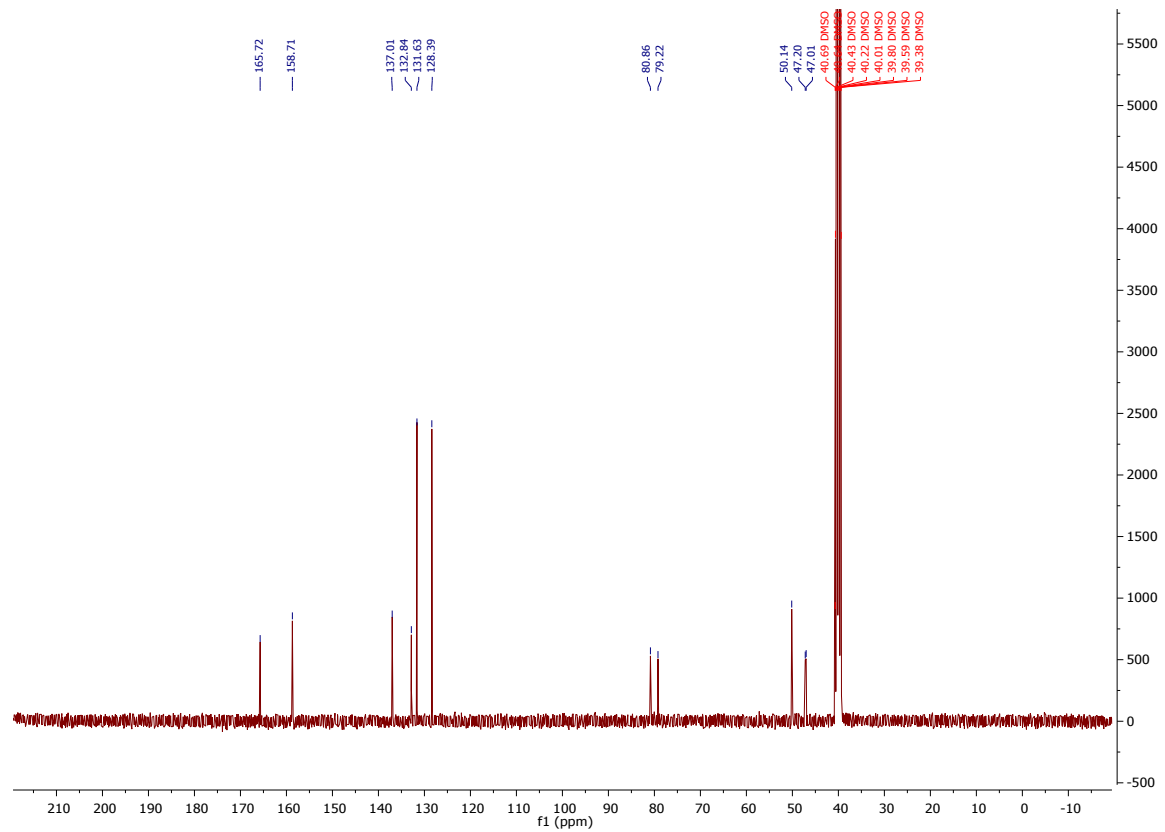

*N*-(4-(1,2,4,5-tetrazin-3-yl)benzyl)acetamide (**31**)

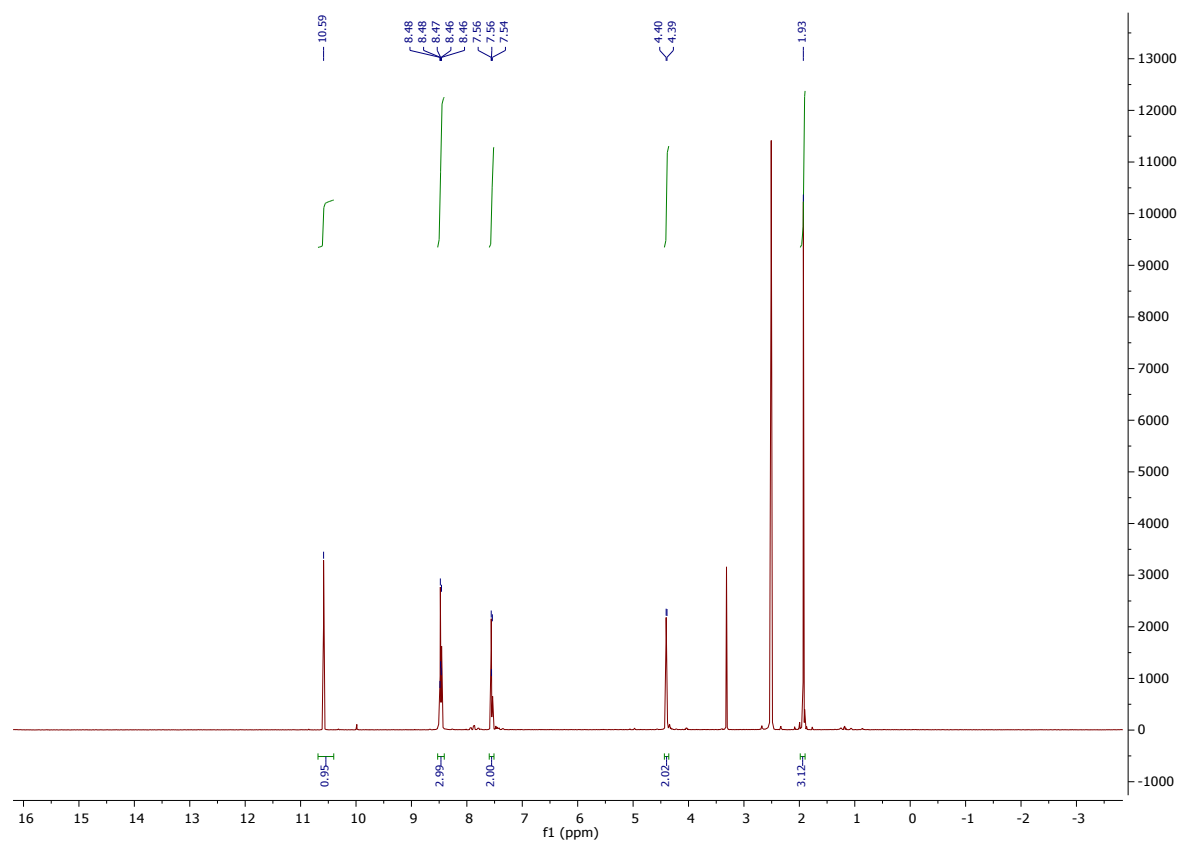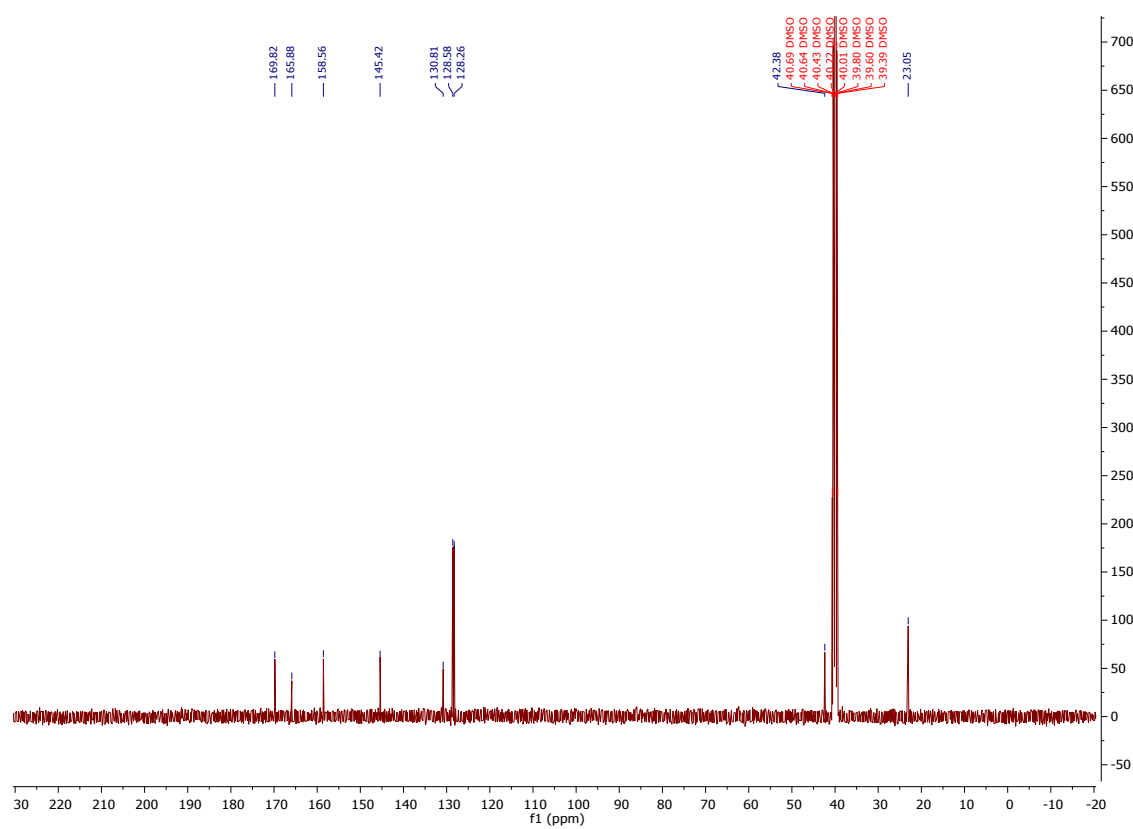

2-((4-(1,2,4,5-Tetrazin-3-yl)benzyl)amino)acetic acid (32)

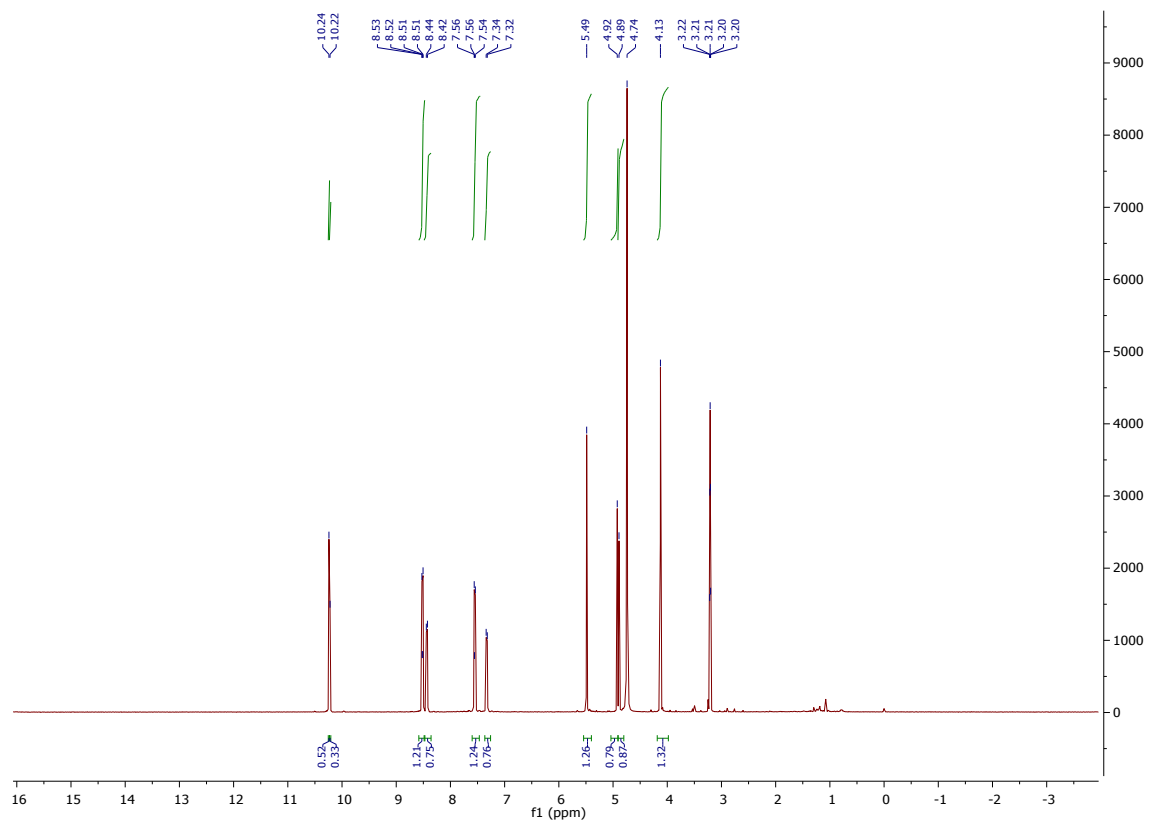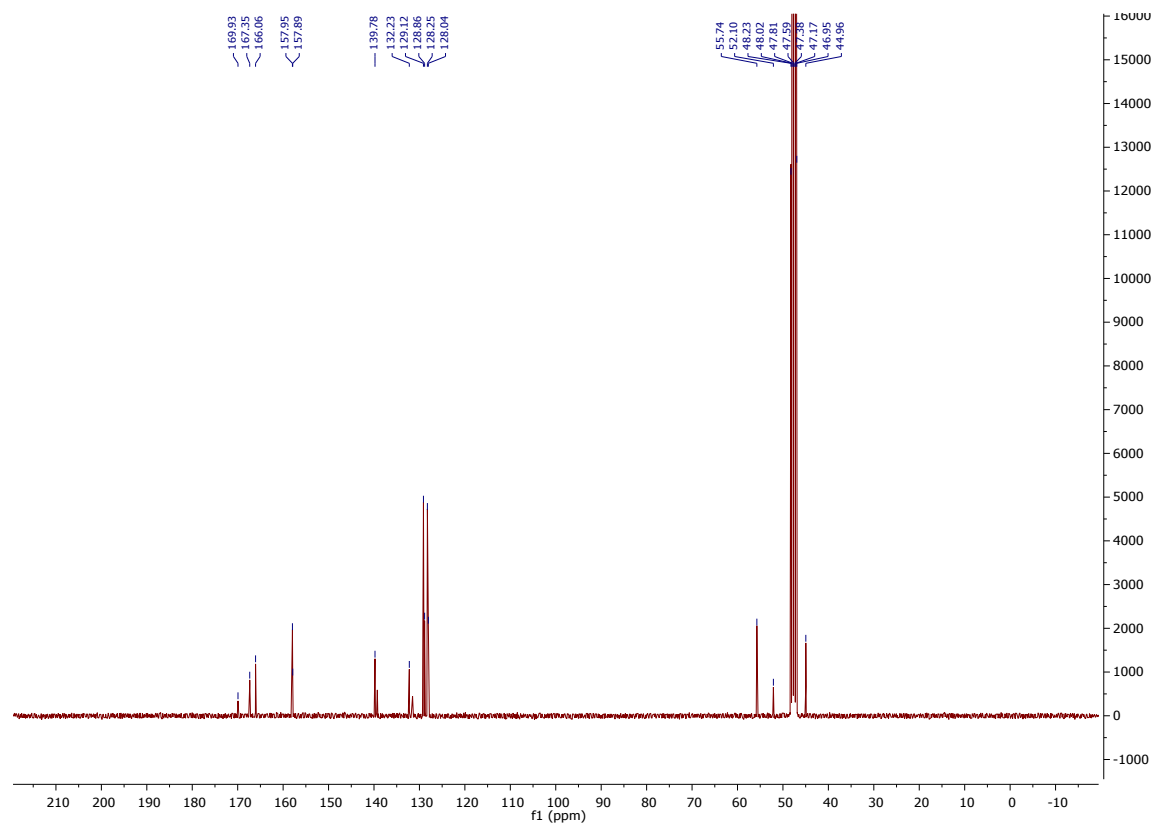

2,2'-((4-(1,2,4,5-Tetrazin-3-yl)benzyl)azanediyldiacetic acid (33)

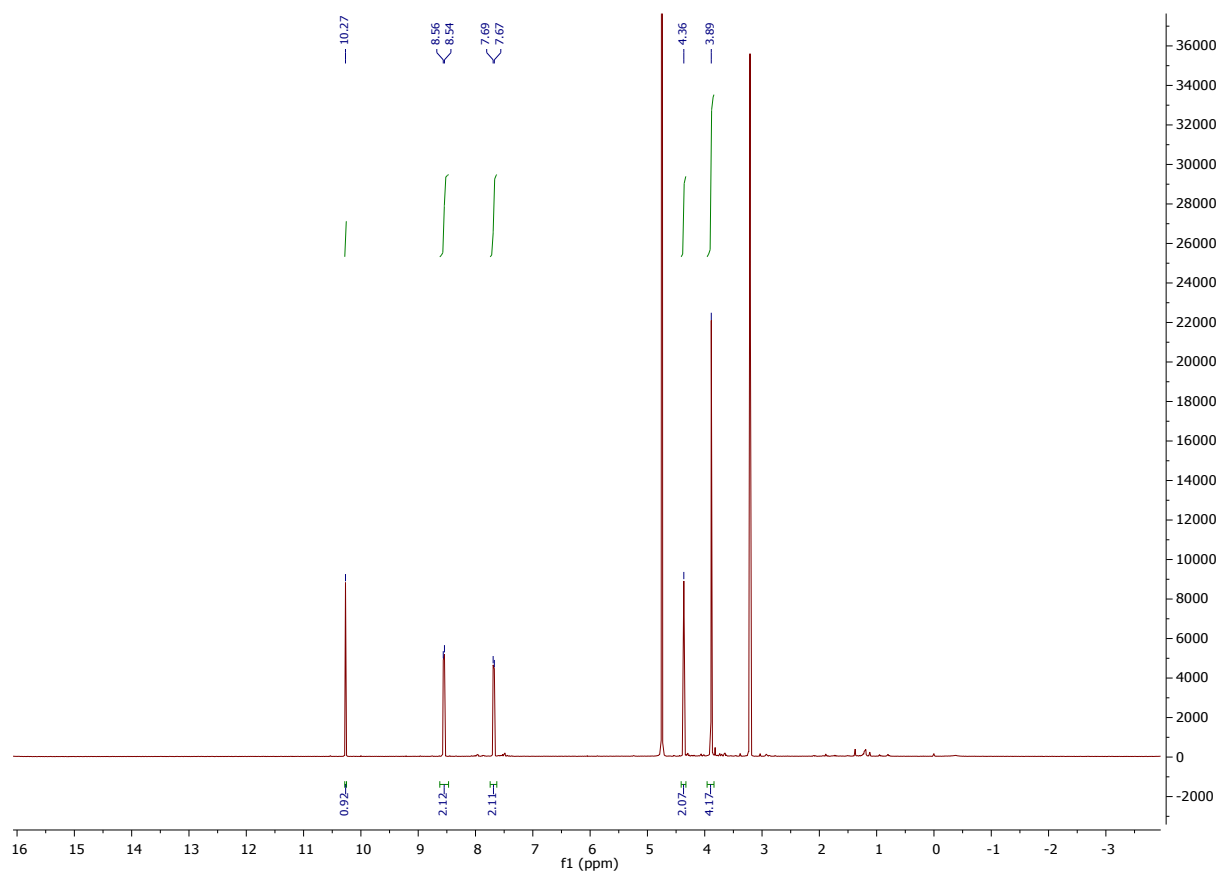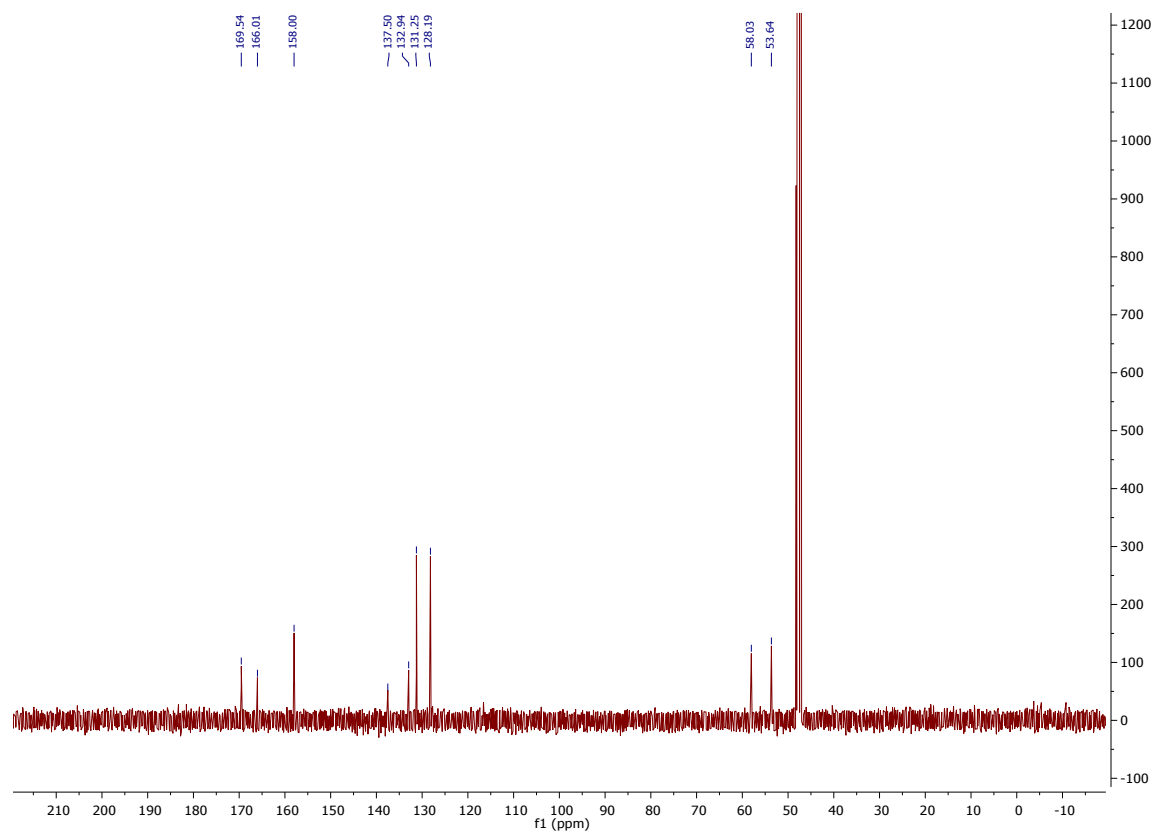

3-Phenyl-6-(pyridin-4-yl)-1,2,4,5-tetrazine (36)

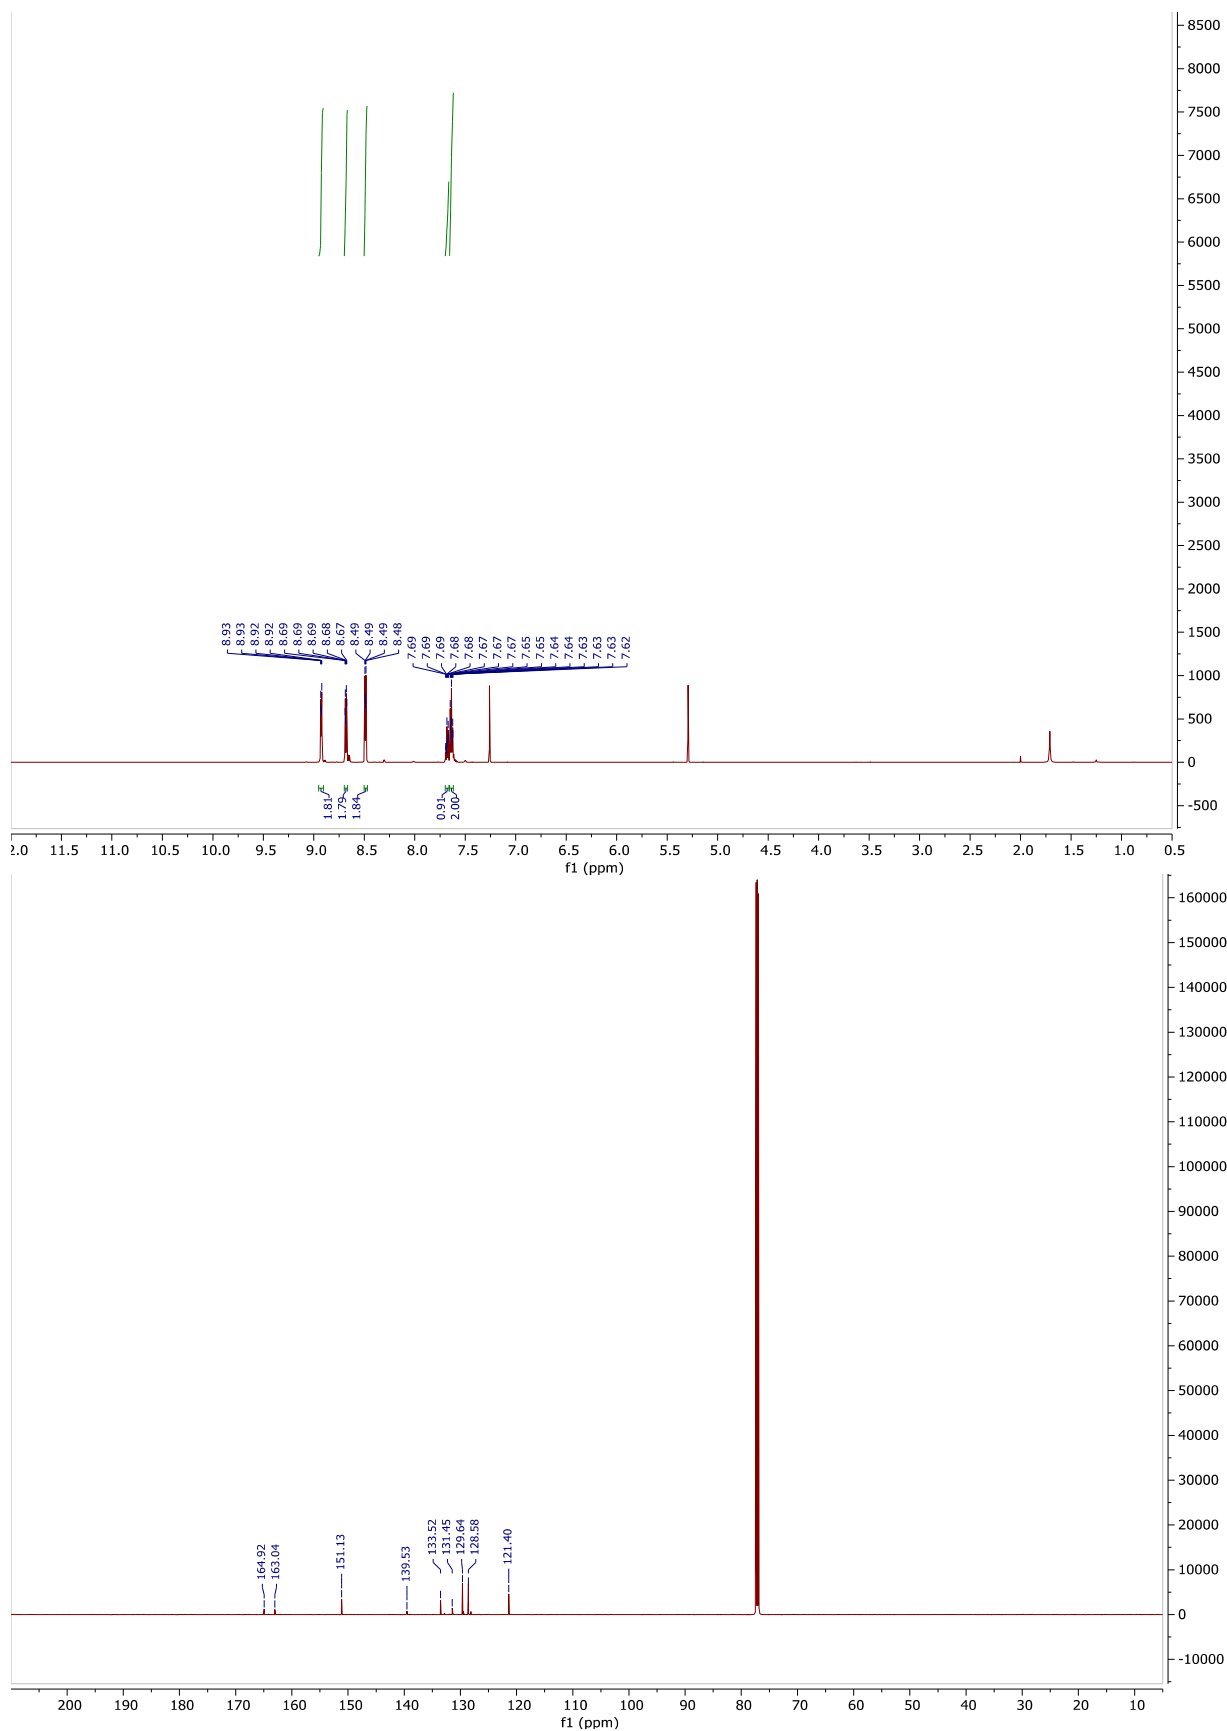

8-Amino-N-(6-(6-(pyridin-2-yl)-1,2,4,5-tetrazin-3-yl)pyridin-3-yl)octanamide (37)

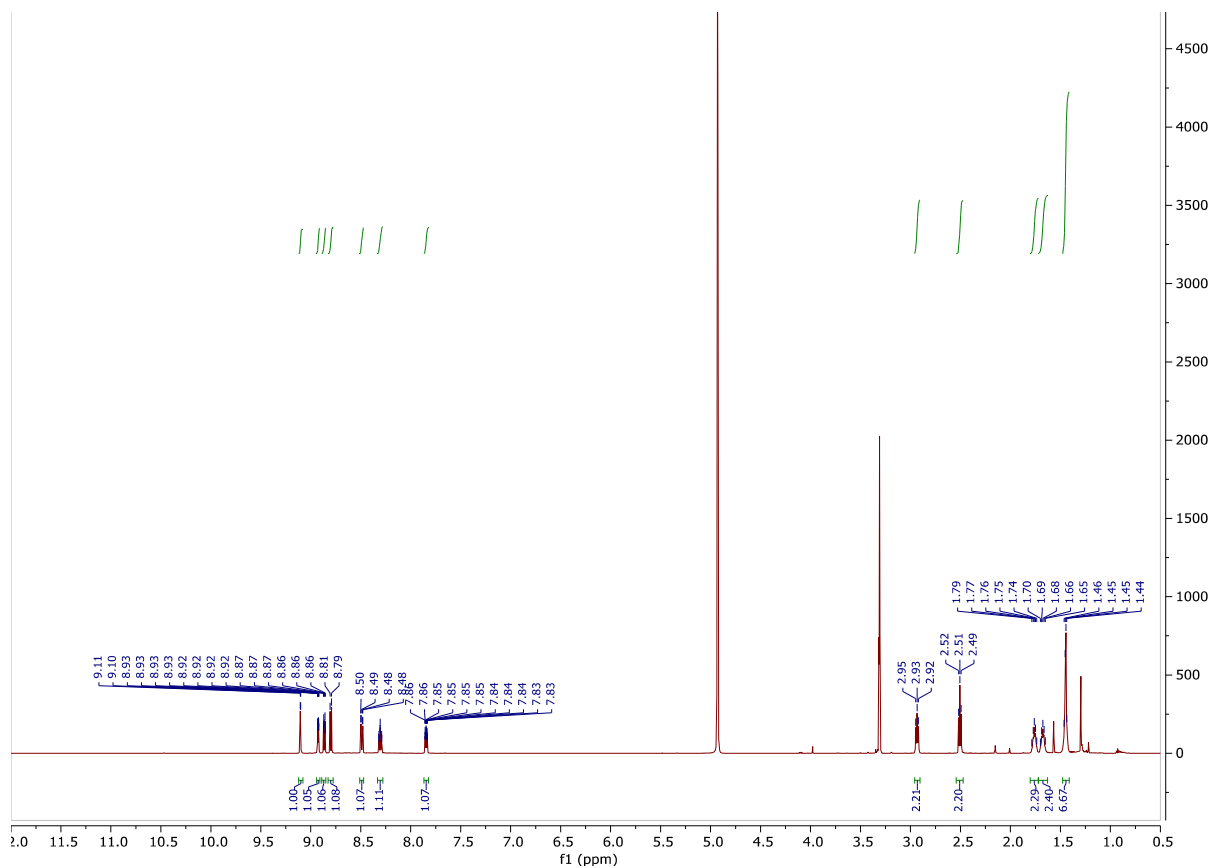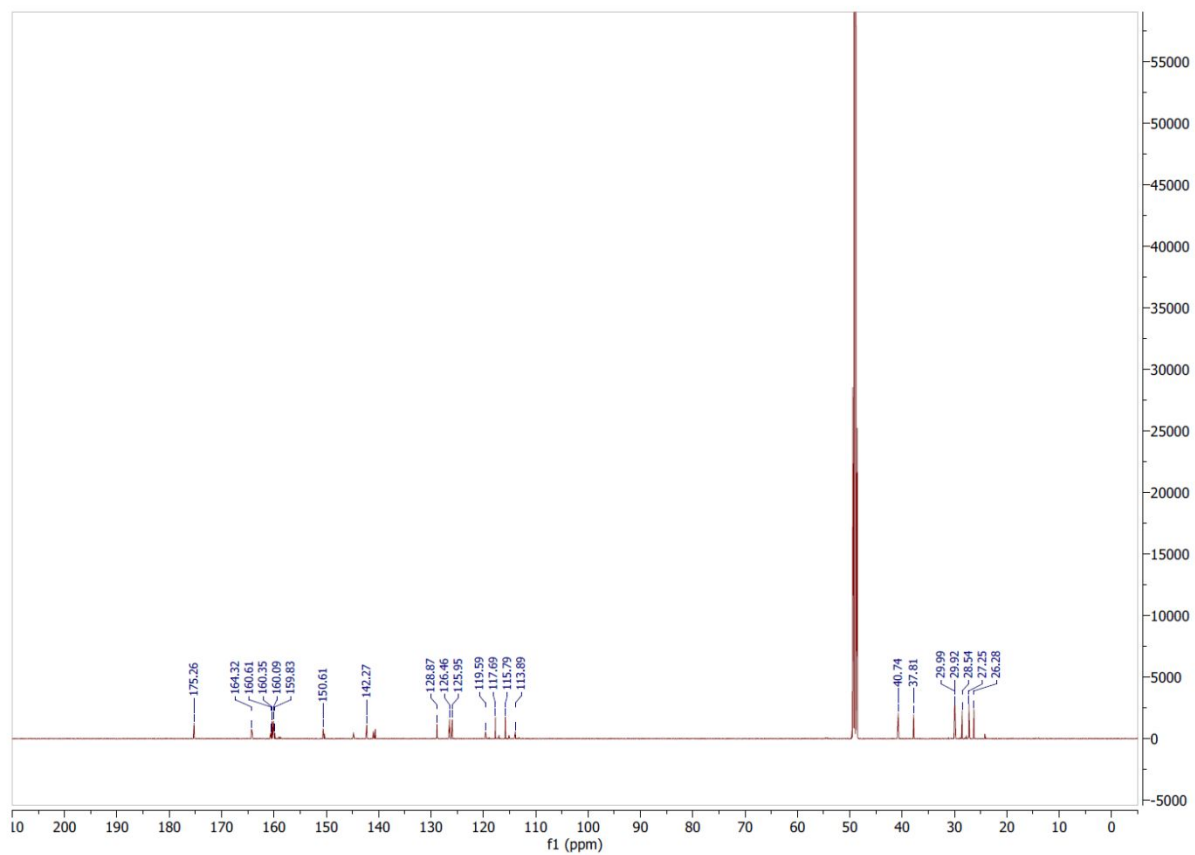

*N*<sup>1</sup>-(2-Aminoethyl)-*N*<sup>5</sup>-(6-(6-(pyridin-2-yl)-1,2,4,5-tetrazin-3-yl)pyridin-3-yl)glutaramide (**38**)

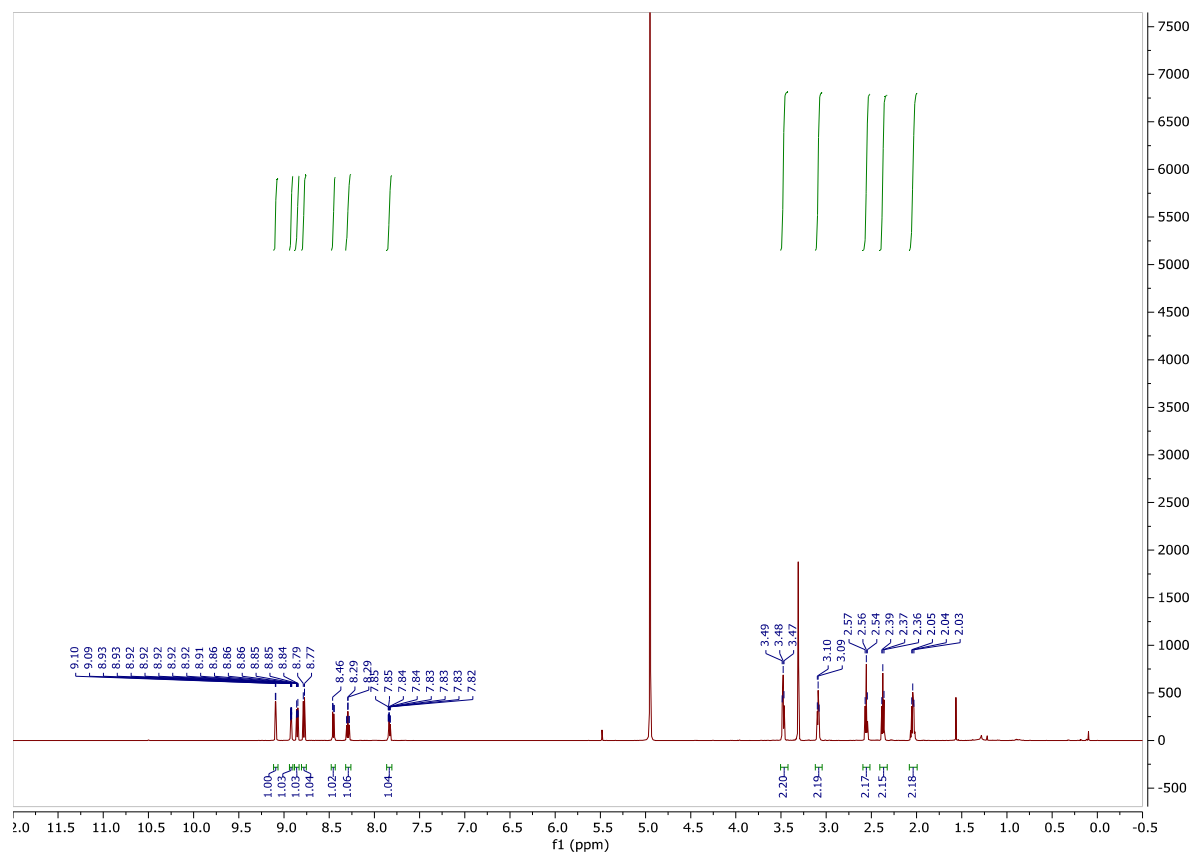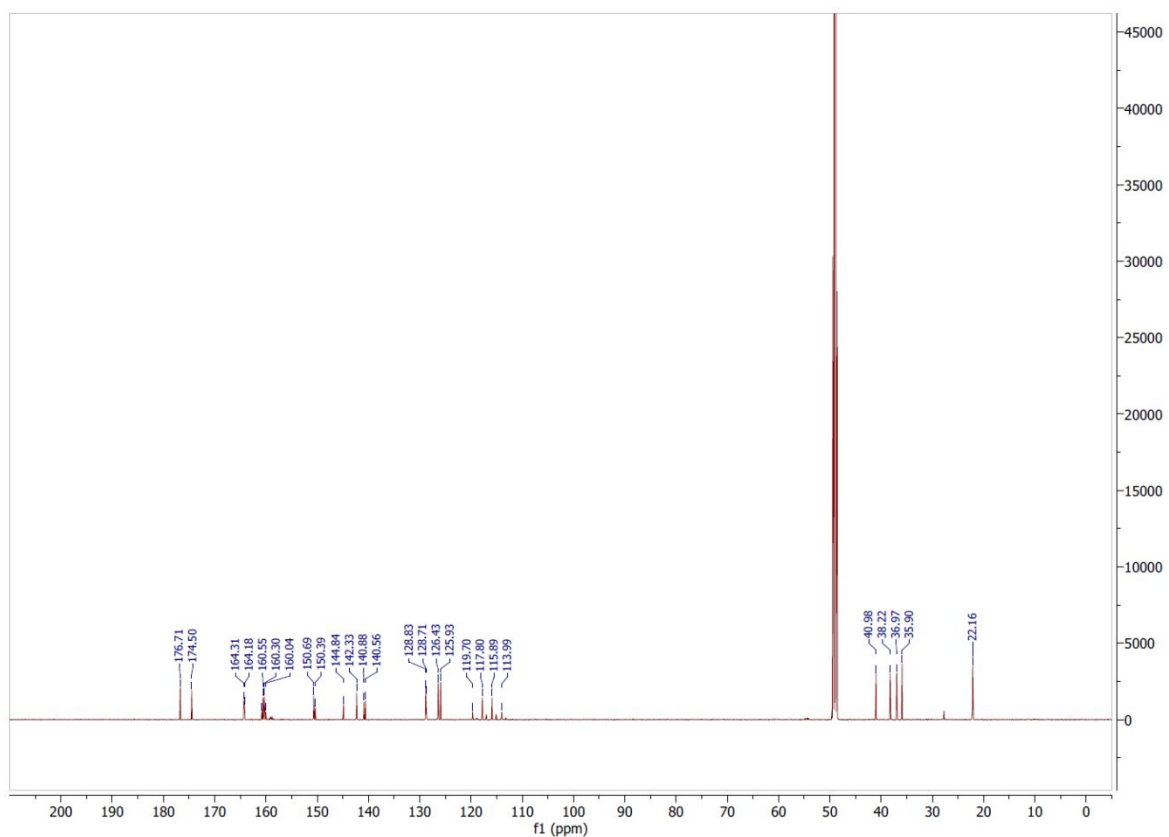



*N*<sup>1</sup>-(25-(11,12-didehydrodibenzo[*b,f*]azocin-5(6*H*)-yl)-22,25-dioxo-3,6,9,12,15,18-hexaoxa-21-azapentacosyl)-*N*<sup>5</sup>-(6-(6-(pyridin-2-yl)-1,2,4,5-tetrazin-3-yl)pyridin-3-yl)glutaramide (**42**)

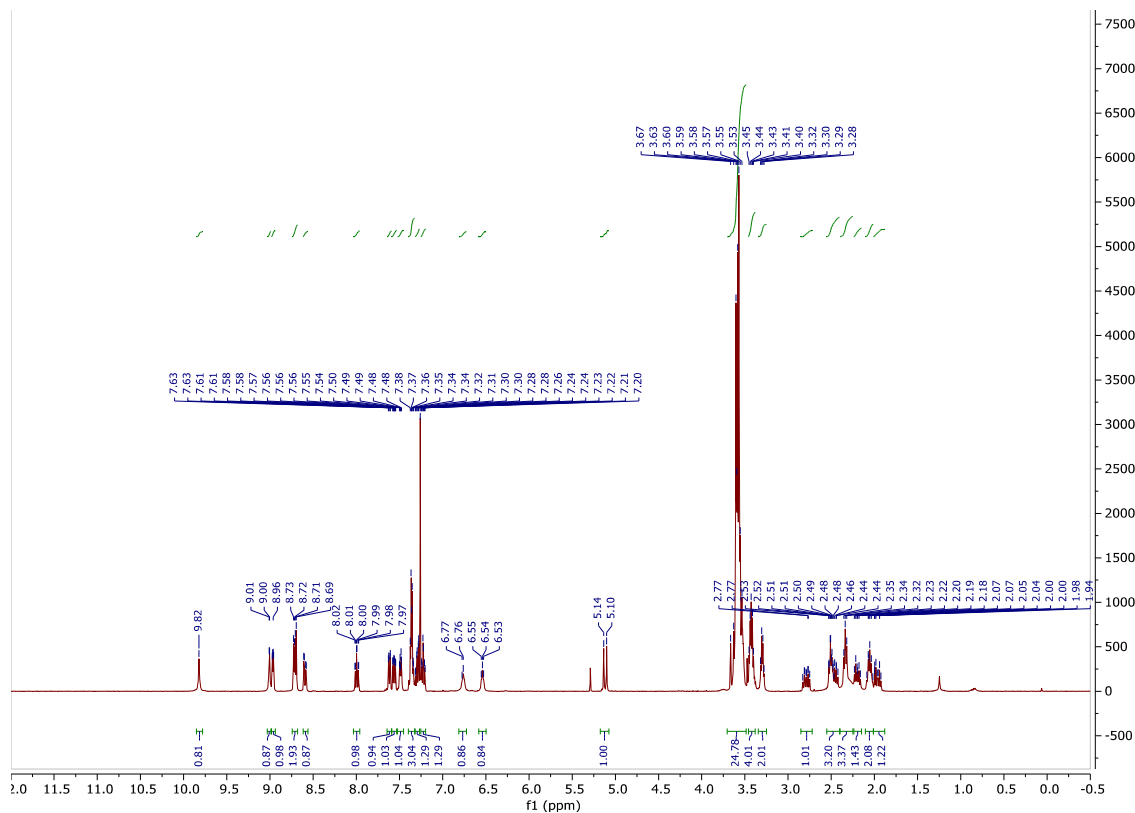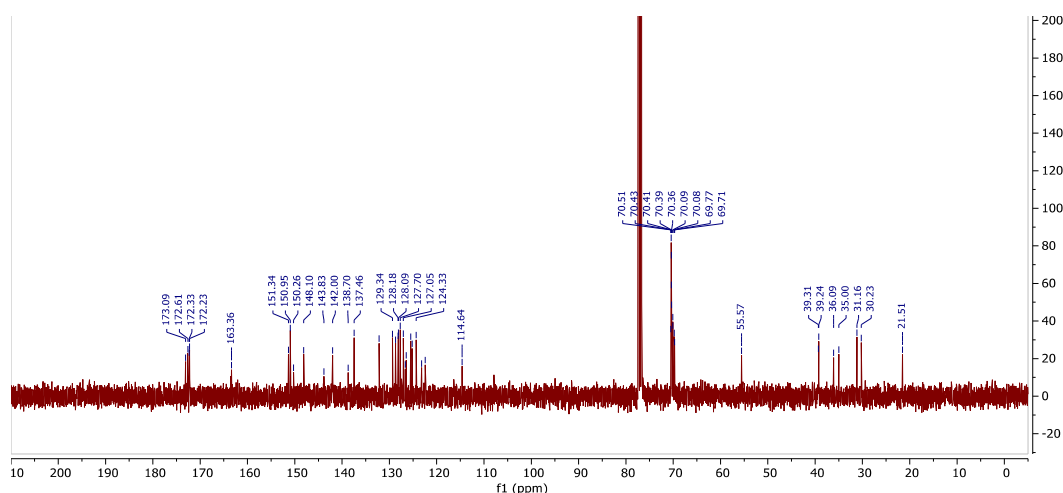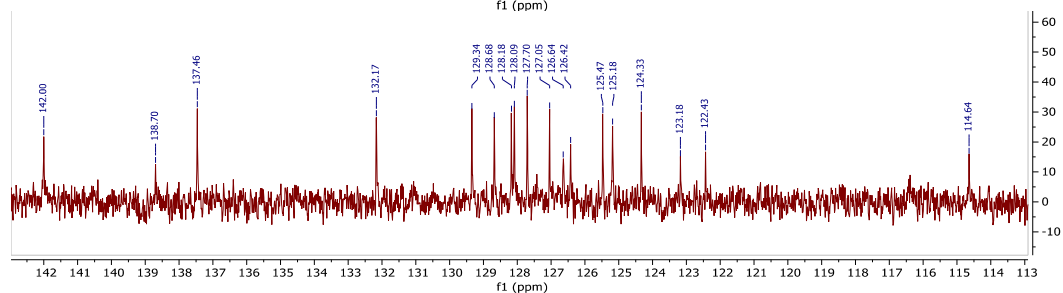

3-(1-(2-fluoroethyl)-1H-1,2,3-triazol-4-yl)-N-(6-(6-(pyridin-2-yl)-1,2,4,5-tetrazin-3-yl)pyridin-3-yl)propanamide (**43**)

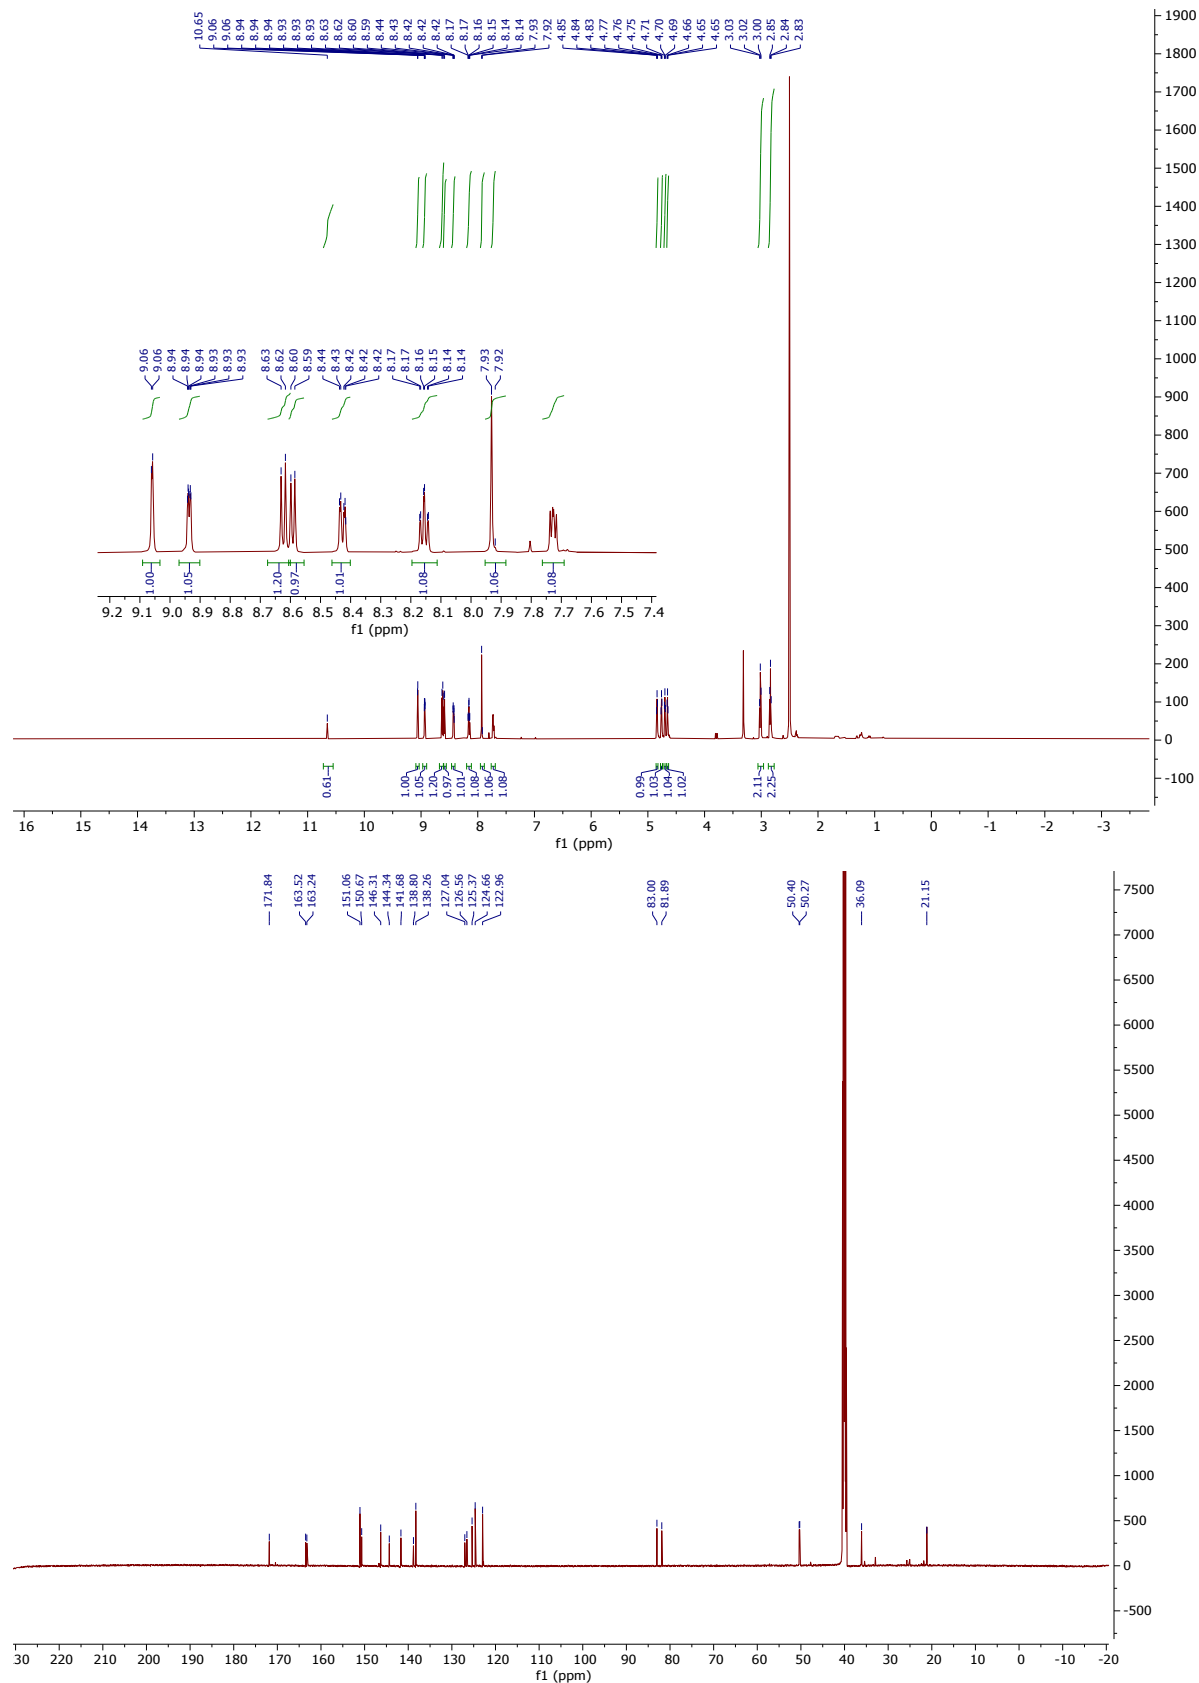

3-(1-(2-(2-(2-(2-Fluoroethoxy)ethoxy)ethoxy)ethyl)-1H-1,2,3-triazol-4-yl)-N-(6-(6-(pyridin-2-yl)-1,2,4,5-tetrazin-3-yl)pyridin-3-yl)propanamide (44)

<sup>1</sup>H NMR

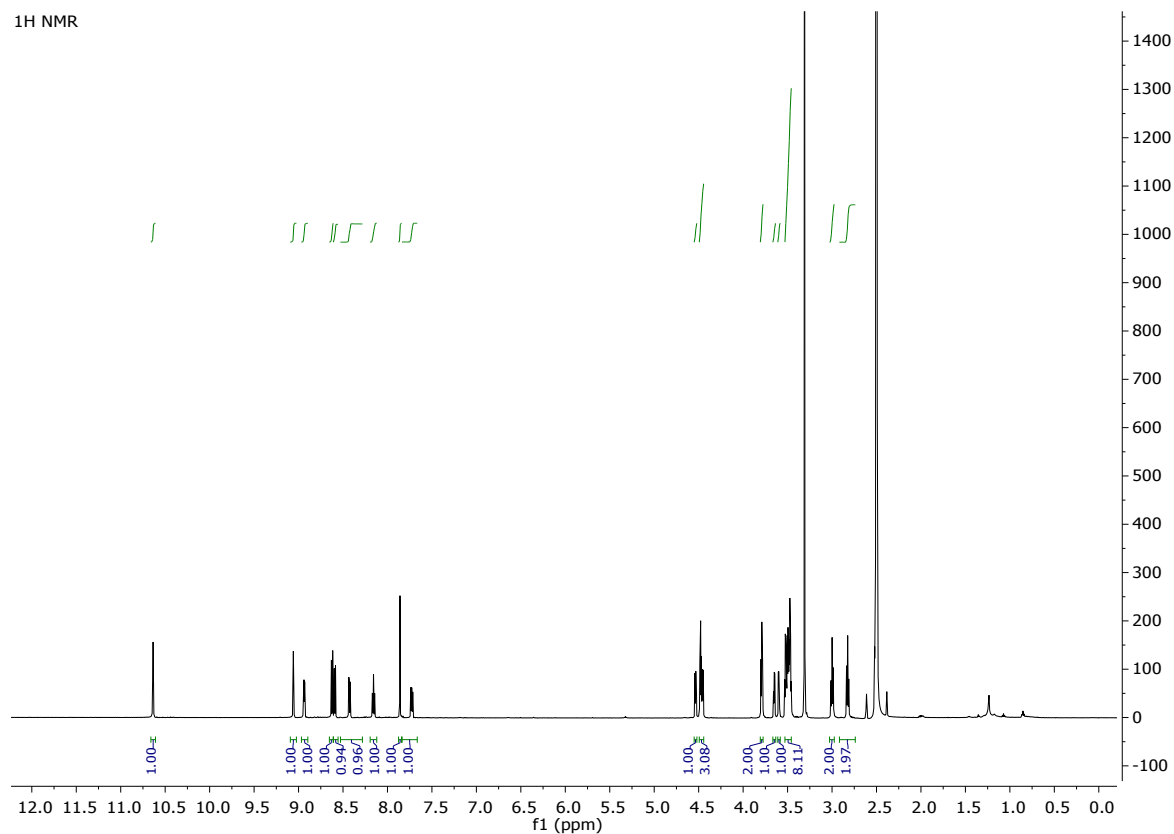

<sup>13</sup>C NMR

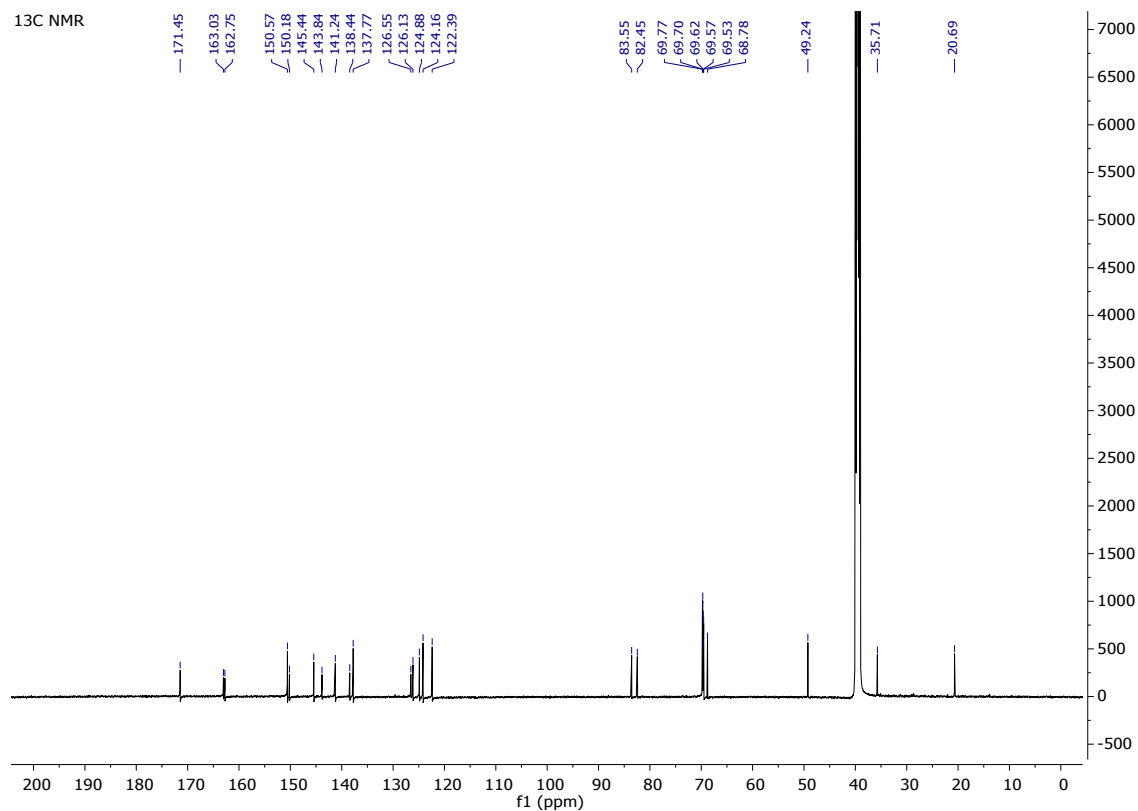

3-(1-((2R,3R,4S,5S,6S)-6-(Fluoromethyl)-3,4,5-Trihydroxytetrahydro-2H-pyran-2-yl)-1H-1,2,3-triazol-4-yl)-N-(6-(6-(pyridin-2-yl)-1,2,4,5-tetrazin-3-yl)pyridin-3-yl)propenamide (45)

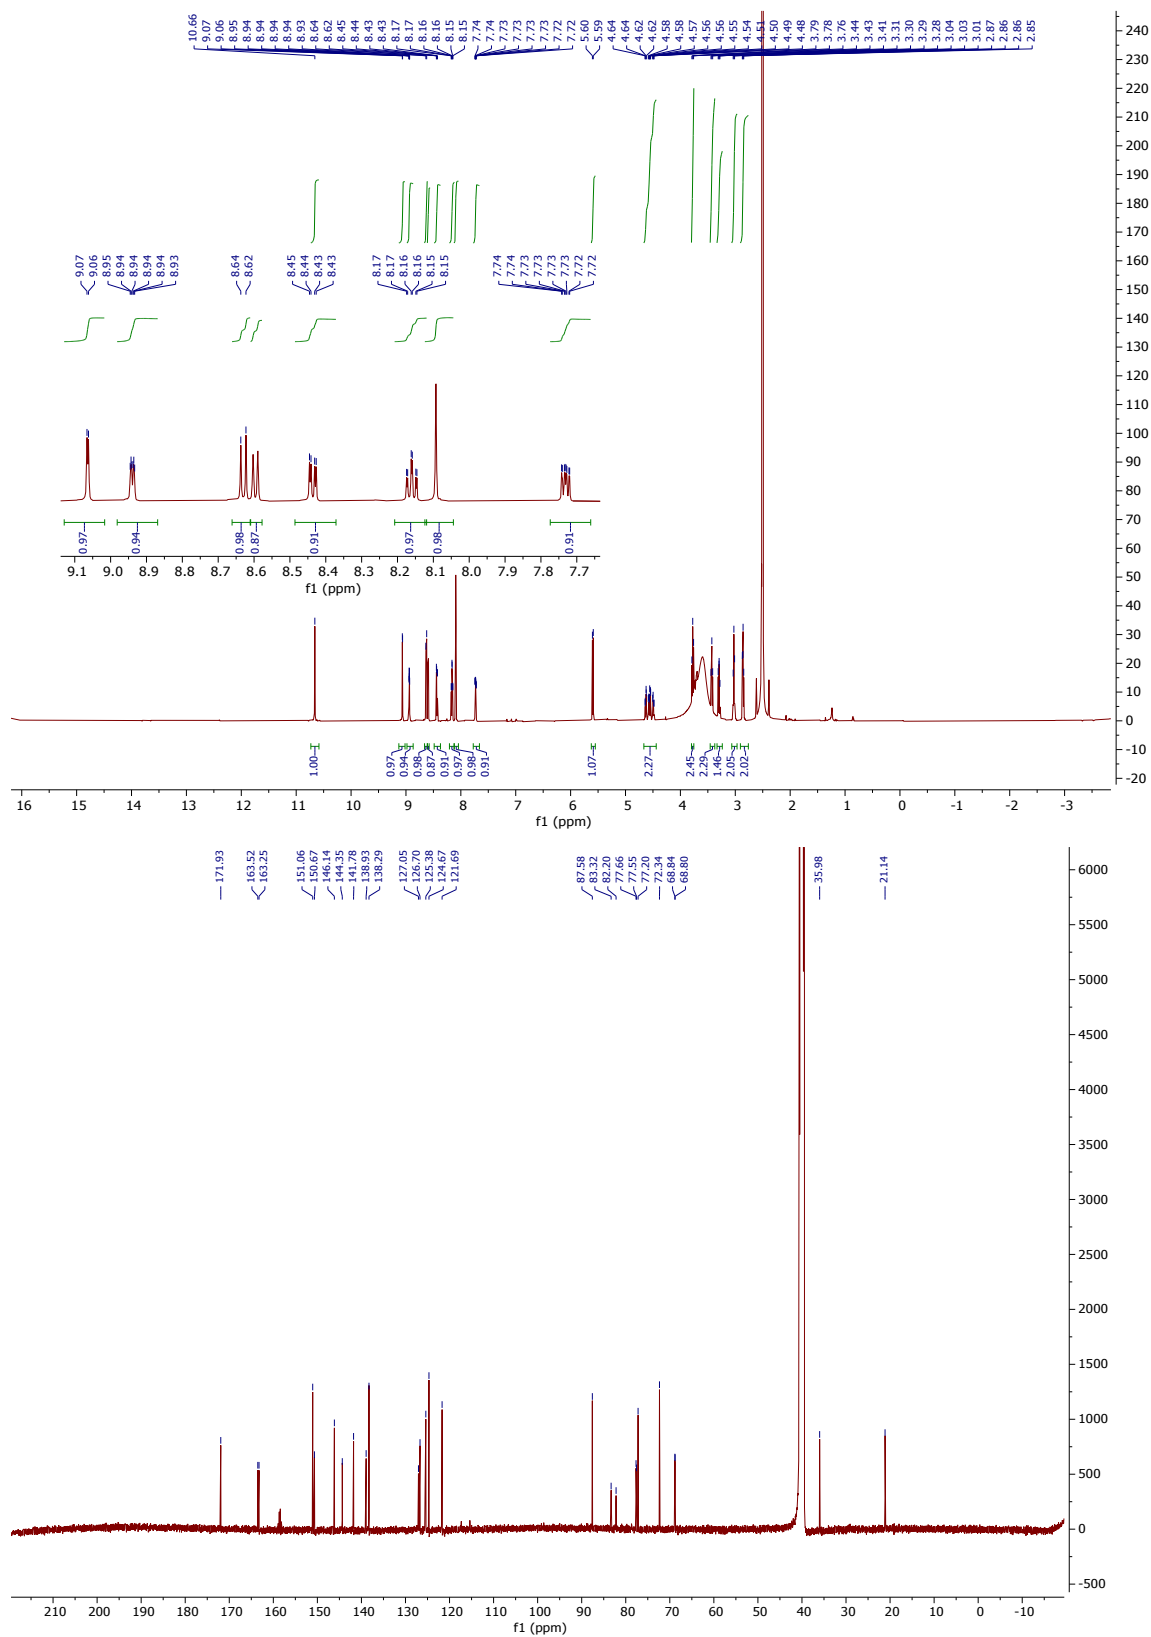

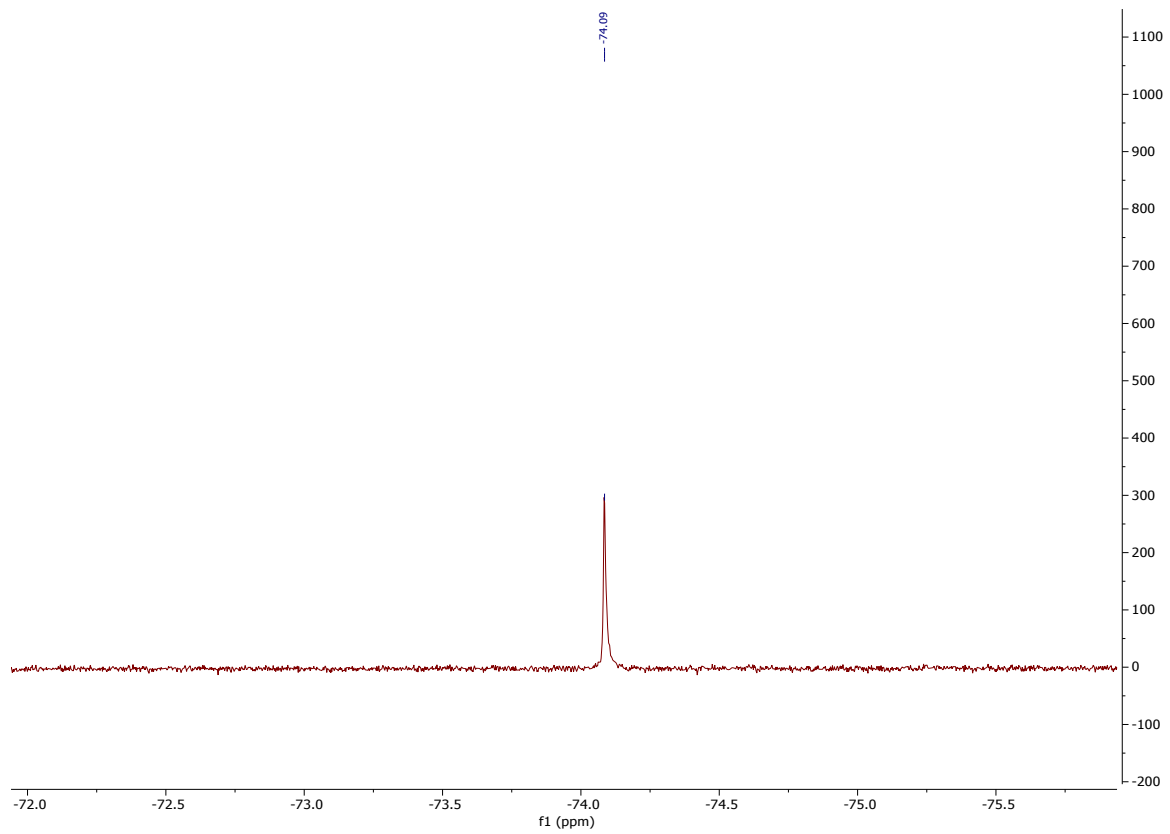

Supplement: pt1c00007_si_002.pdf [file pt1c00007_si_002.pdf]
