# Supplementary material for: Lipophilicity and Click Reactivity Determine the Performance of Bioorthogonal Tetrazine Tools in Pretargeted In Vivo Chemistry
Source: PubMed Central journal article supplement — ACS Pharmacol Transl Sci. 2021 Feb 16;4(2):824–33. doi: 10.1021/acsptsci.1c00007 (PMC8033778; doi:10.1021/acsptsci.1c00007), 2021-02-16

## Supporting Information (3)

### Lipophilicity and click reactivity determine the performance of bioorthogonal tetrazine tools in pretargeted *in vivo* chemistry

E. Johanna L. Stéen<sup>†,‡,¶</sup>, Jesper T. Jørgensen<sup>‡,¶,†</sup>, Christoph Denk<sup>¶,†</sup>, Umberto M. Battisti<sup>†</sup>, Kamilla Nørregård<sup>‡,¶</sup>, Patricia E. Edem<sup>†,‡</sup>, Klas Bratteby<sup>‡,†,#</sup>, Vladimir Shalgunov<sup>†,‡</sup>, Martin Wilkovitsch<sup>¶</sup>, Dennis Svatunek<sup>¶</sup>, Christian B. M. Poulie<sup>†,‡</sup>, Lars Hvass<sup>‡,¶</sup>, Marina Simón<sup>‡,¶,†</sup>, Thomas Wanek<sup>§</sup>, Raffaella Rossin<sup>¶</sup>, Marc Robillard<sup>¶</sup>, Jesper L. Kristensen<sup>†</sup>, Hannes Mikula<sup>¶,\*</sup>, Andreas Kjaer<sup>‡,‡,\*</sup> and Matthias M. Herth<sup>†,‡,\*</sup>

<sup>†</sup>Department of Drug Design and Pharmacology, Faculty of Health and Medical Sciences, University of Copenhagen, Universitetsparken 2, 2100 Copenhagen, Denmark.

<sup>‡</sup>Department of Clinical Physiology, Nuclear Medicine & PET, Rigshospitalet, Blegdamsvej 9, 2100 Copenhagen, Denmark.

<sup>‡</sup>Cluster for Molecular Imaging, Department of Biomedical Sciences, University of Copenhagen, Blegdamsvej 3, 2100 Copenhagen Ø, Denmark.

<sup>#</sup> Department of Radiation Physics, Skåne University Hospital, Barngatan 3, 22242 Lund, Sweden

<sup>§§</sup>Preclinical Molecular Imaging, AIT Austrian Institute of Technology GmbH, 2444 Seibersdorf, Austria

<sup>¶</sup>Institute of Applied Synthetic Chemistry, Technische Universität Wien (TU Wien), Getreidemarkt 9, 1060 Vienna, Austria.

<sup>¶</sup>Tagworks Pharmaceuticals, Geert Grooteplein 10, 6525 GA Nijmegen, Netherlands.

<sup>†</sup>Equally contributing authors

\*Corresponding authors

### NMR Spectra for Tz I-VI, precursor and supplementary compounds

6-(6-(Pyridin-2-yl)-1,4-dihydro-1,2,4,5-tetrazin-3-yl)pyridin-3-amine (S1)

<sup>1</sup>H NMR

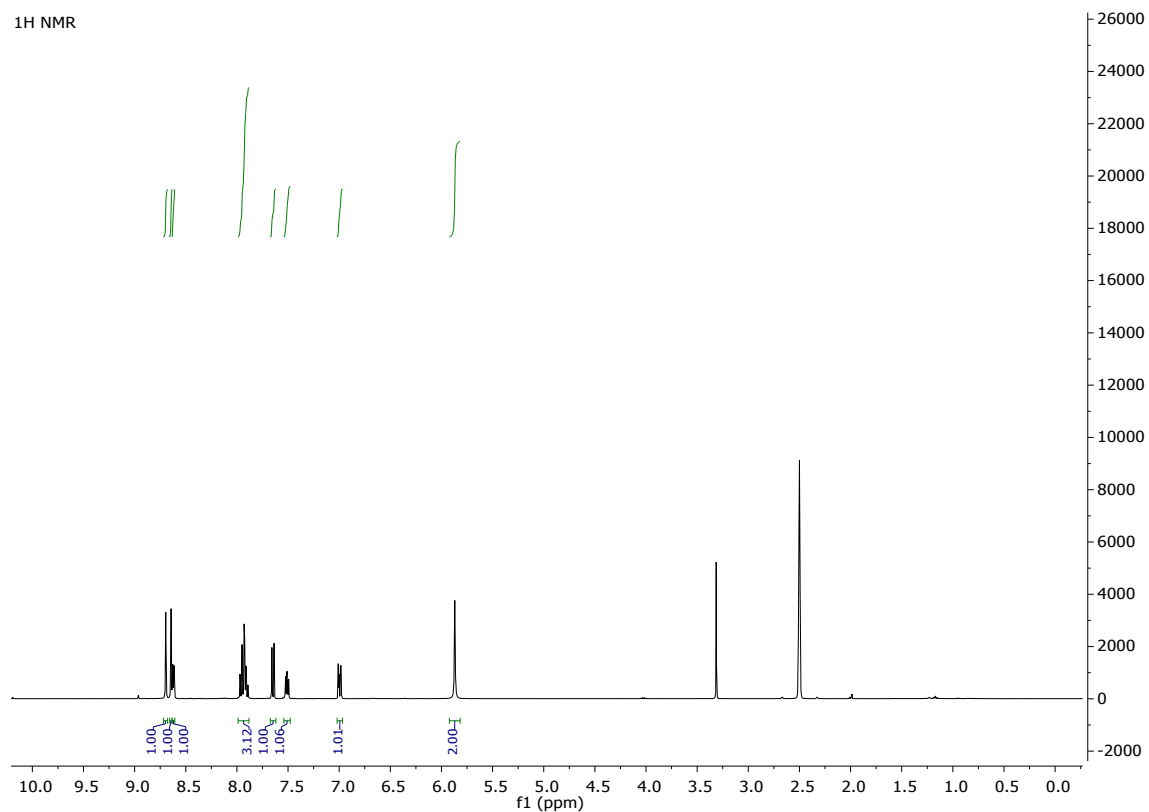

<sup>13</sup>C NMR

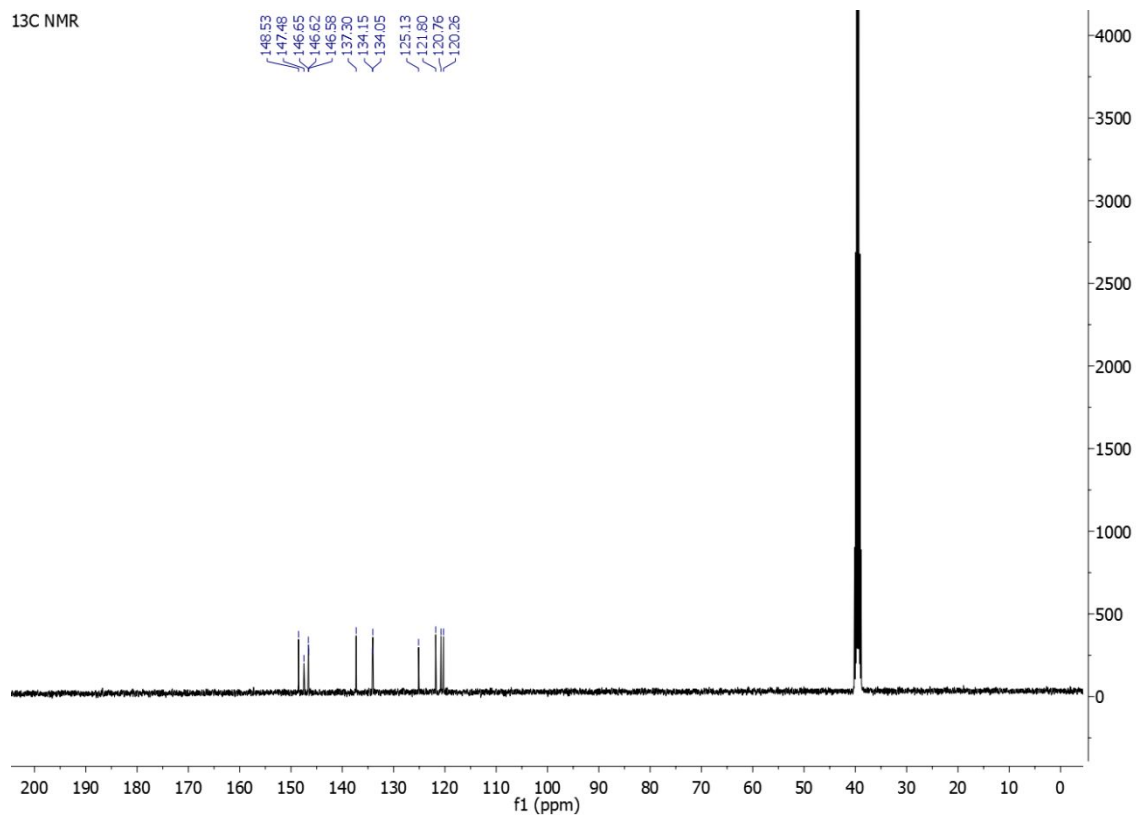

6-(6-(Pyridin-2-yl)-1,2,4,5-tetrazin-3-yl)pyridin-3-amine (S2)

<sup>1</sup>H NMR

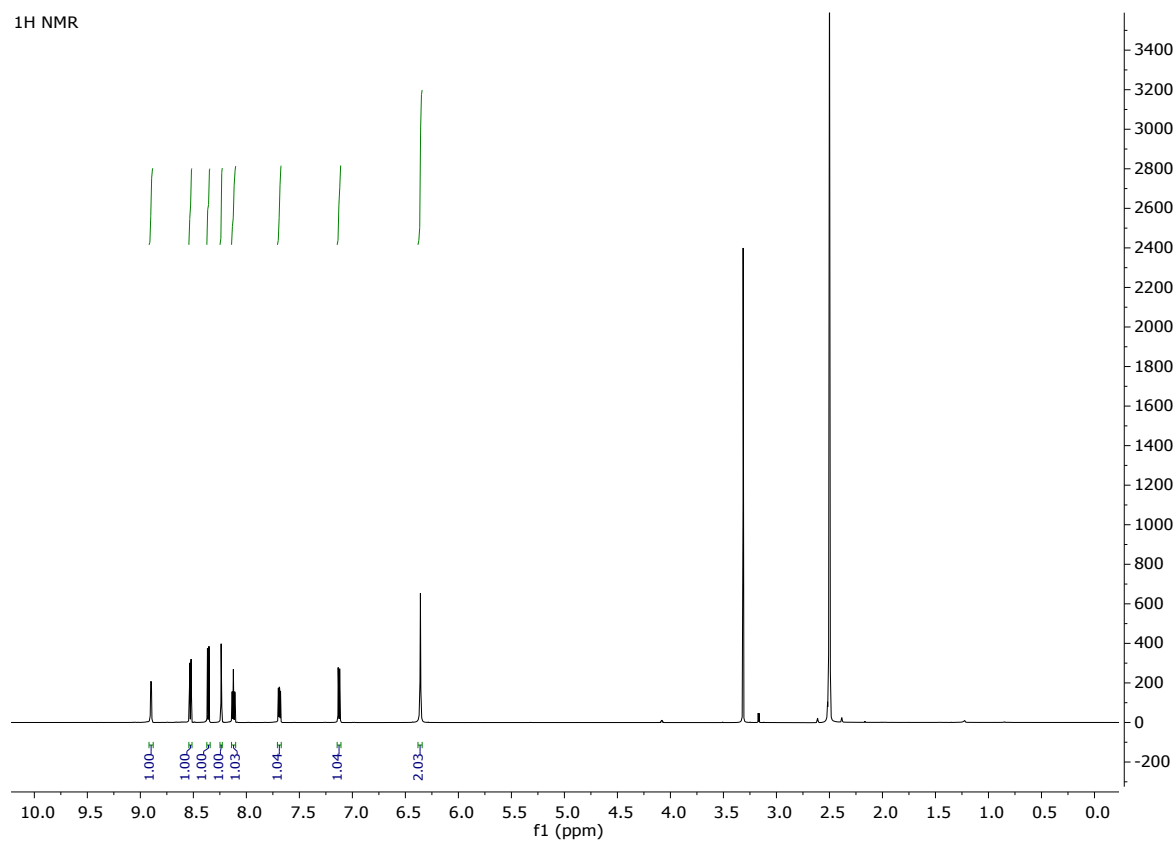

<sup>13</sup>C NMR

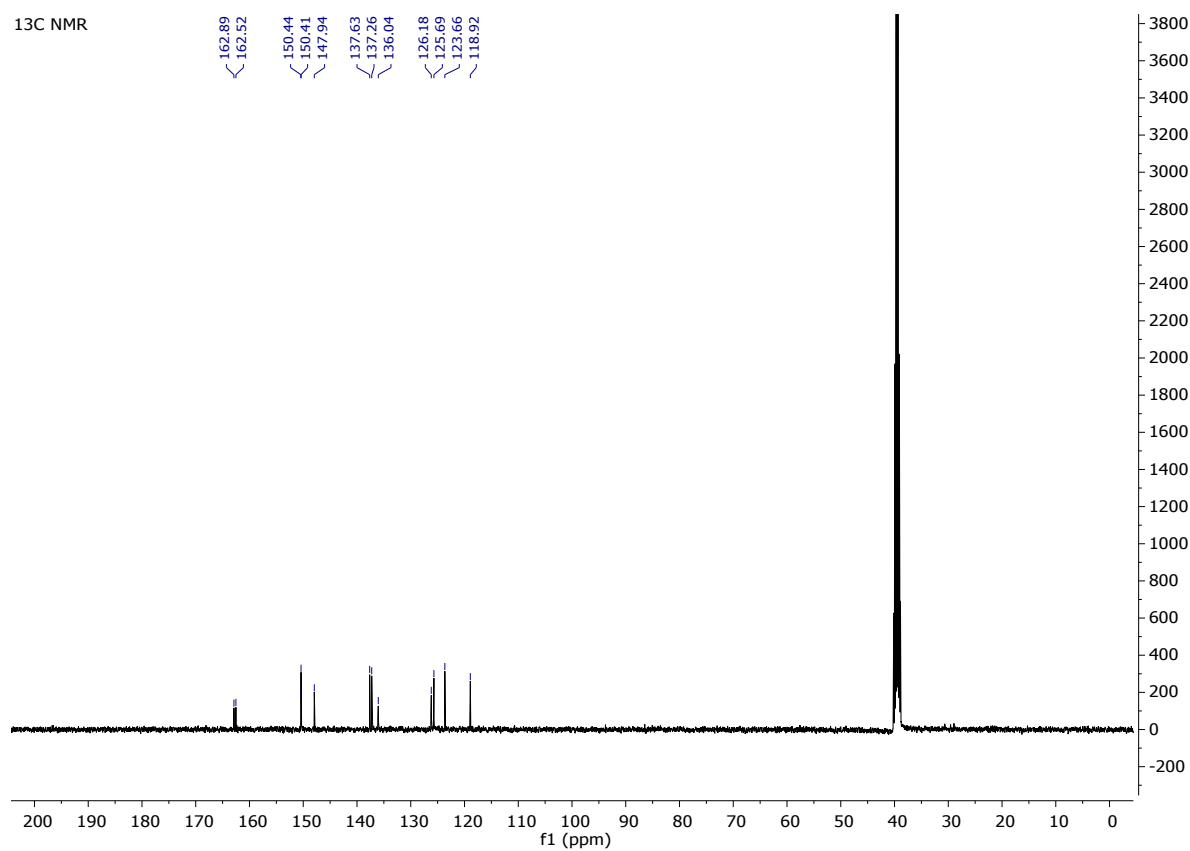

4-Pentynoic anhydride (S3)

<sup>1</sup>H NMR

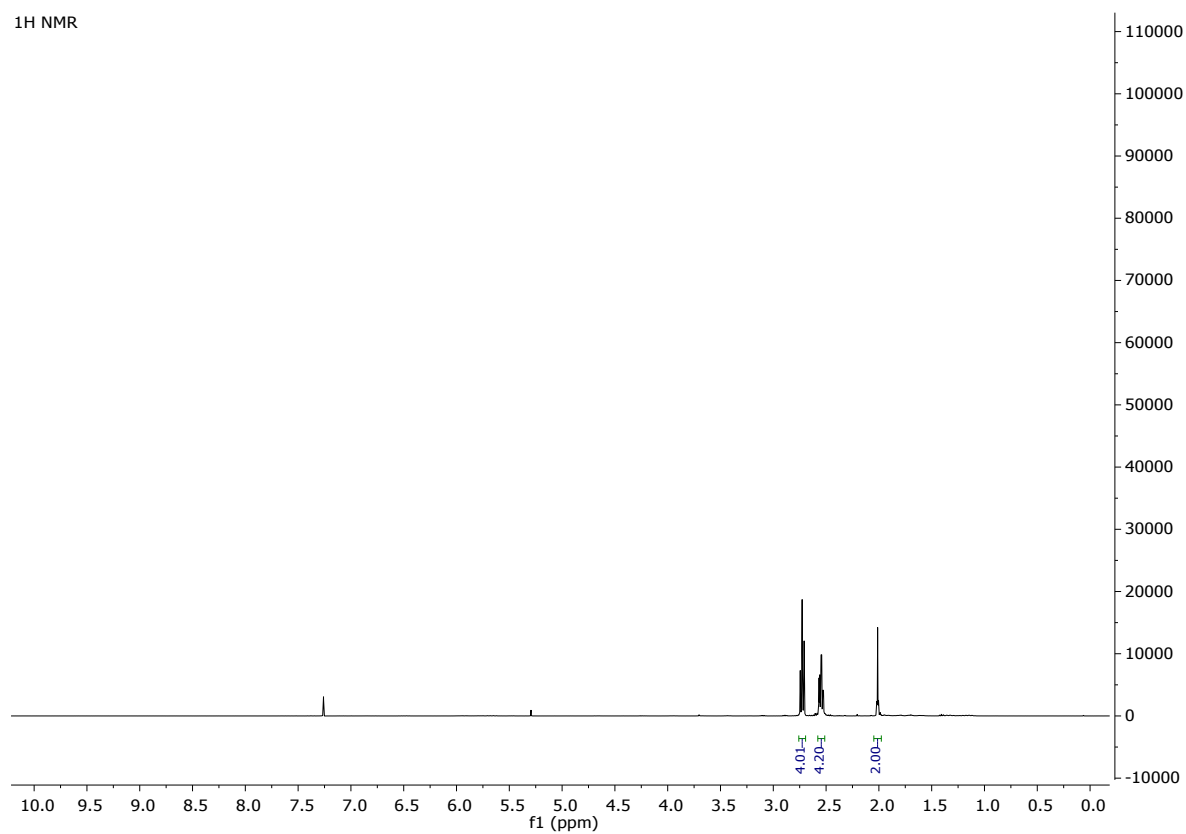

<sup>13</sup>C NMR

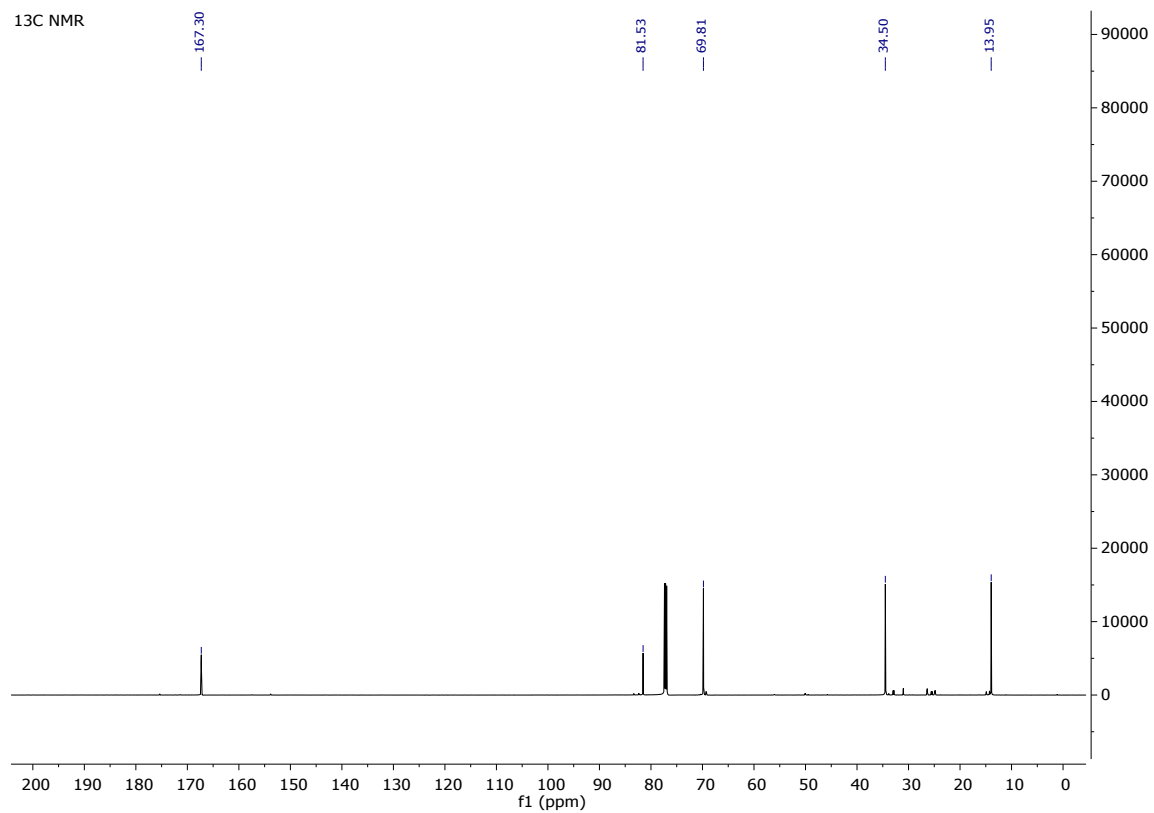

*N*-(6-(6-(Pyridin-2-yl)-1,2,4,5-tetrazin-3-yl)pyridin-3-yl)pent-4-ynamide (**1**)

<sup>1</sup>H NMR

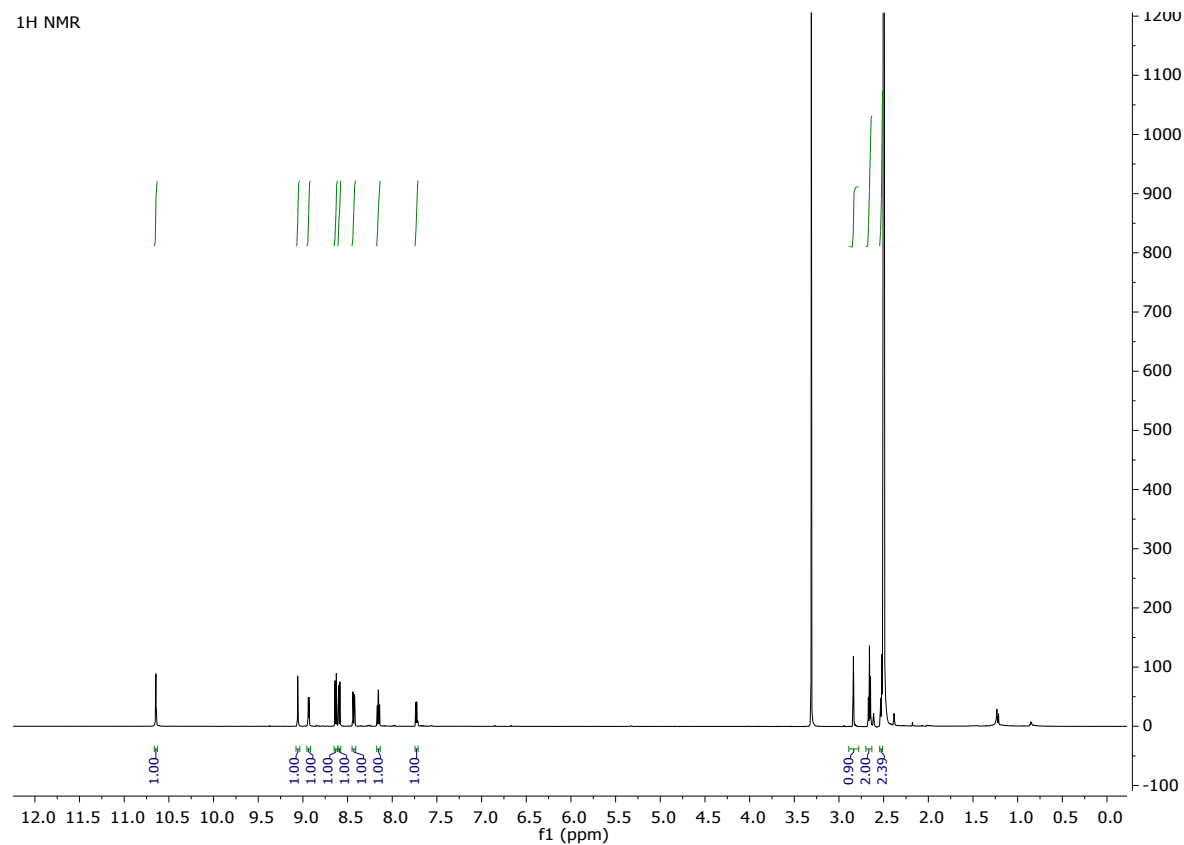

<sup>13</sup>C NMR

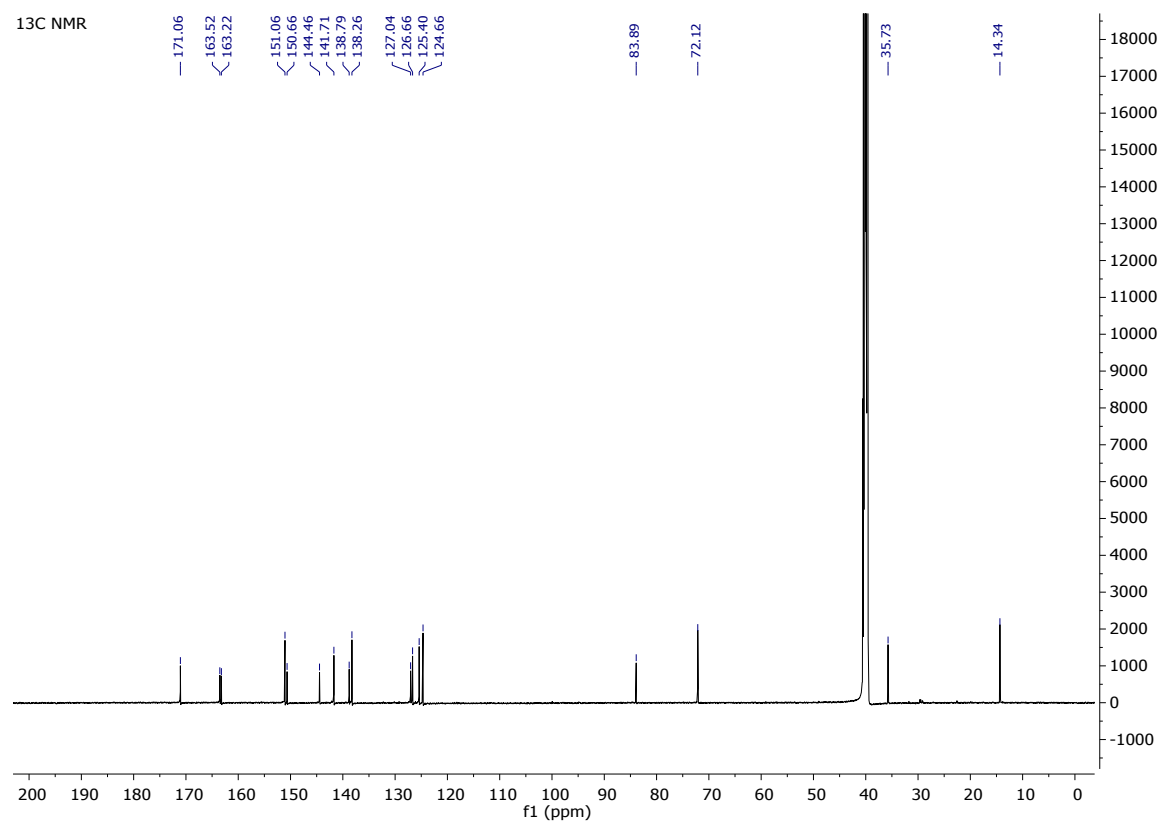

*Methyl 4-((trimethylsilyl)ethynyl)benzoate (starting material for carboxylic acid S4)*

<sup>1</sup>H NMR

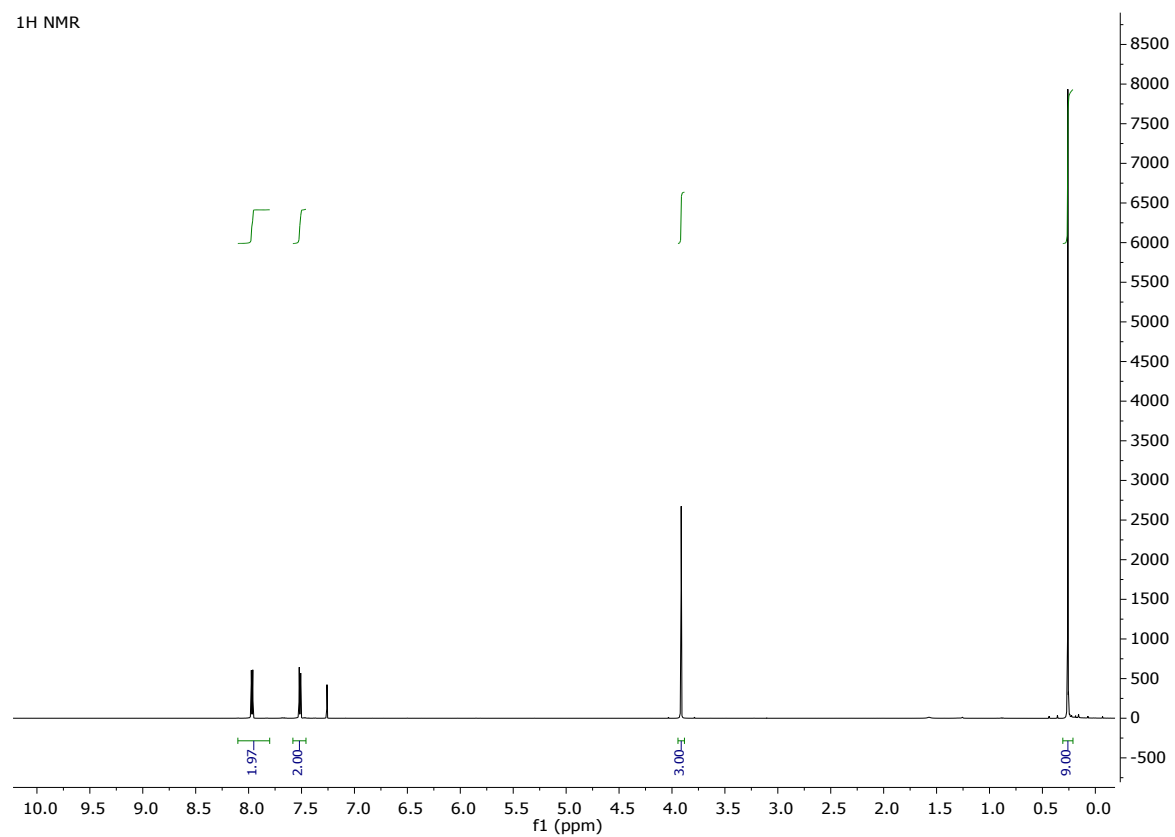

<sup>13</sup>C NMR

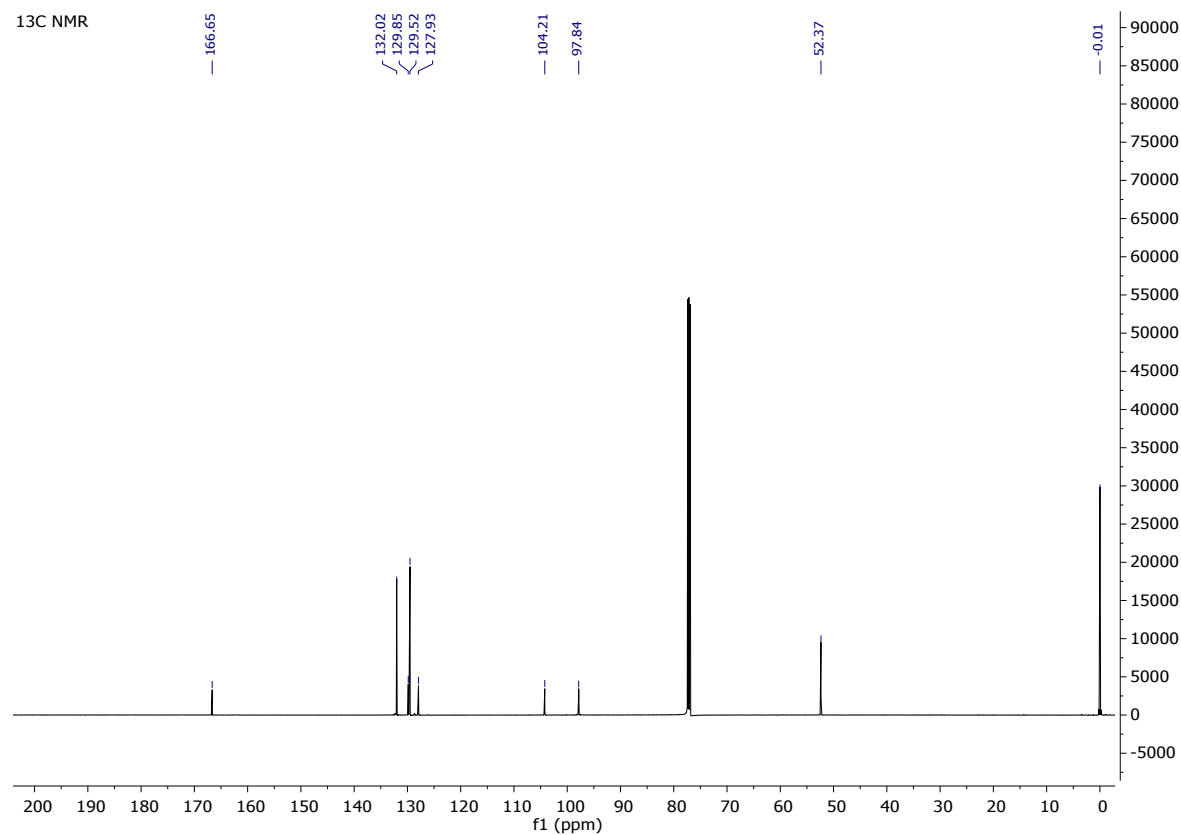

4-Ethynylbenzoic acid (S4)

<sup>1</sup>H NMR

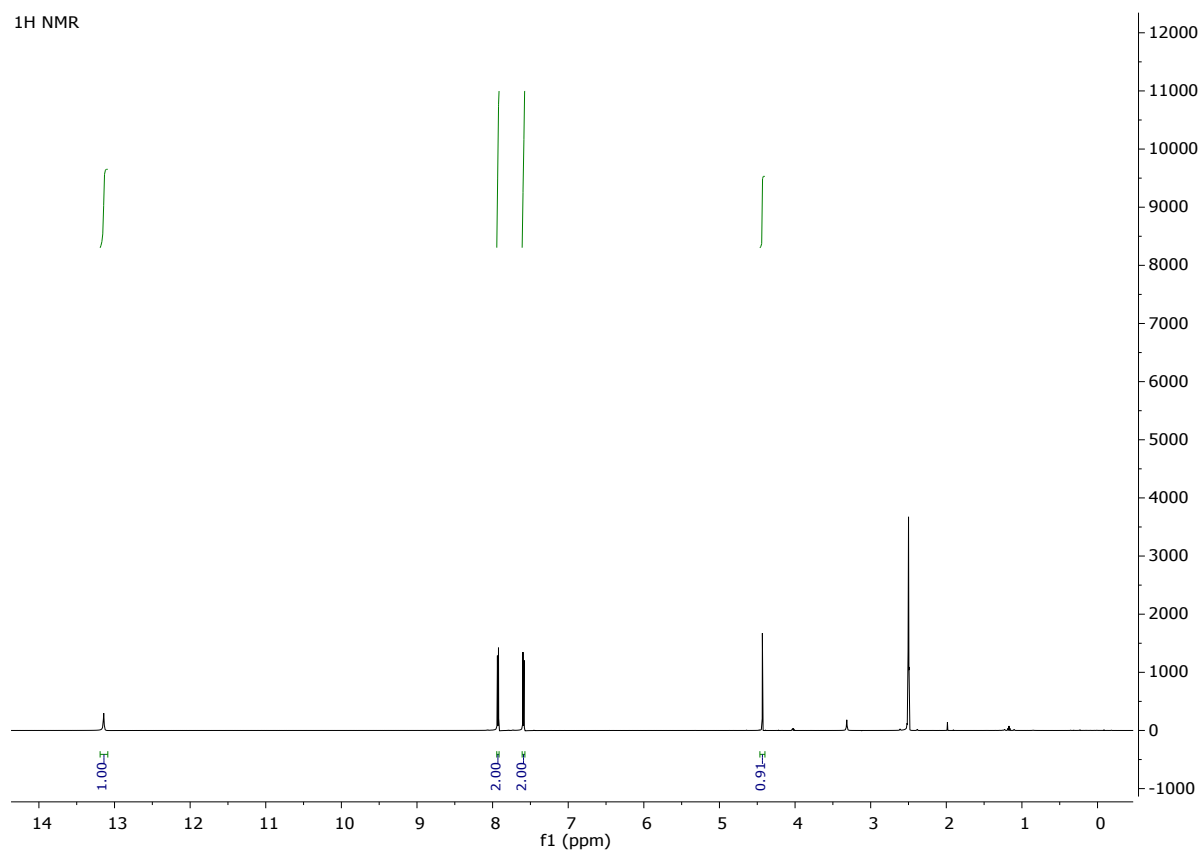

<sup>13</sup>C NMR

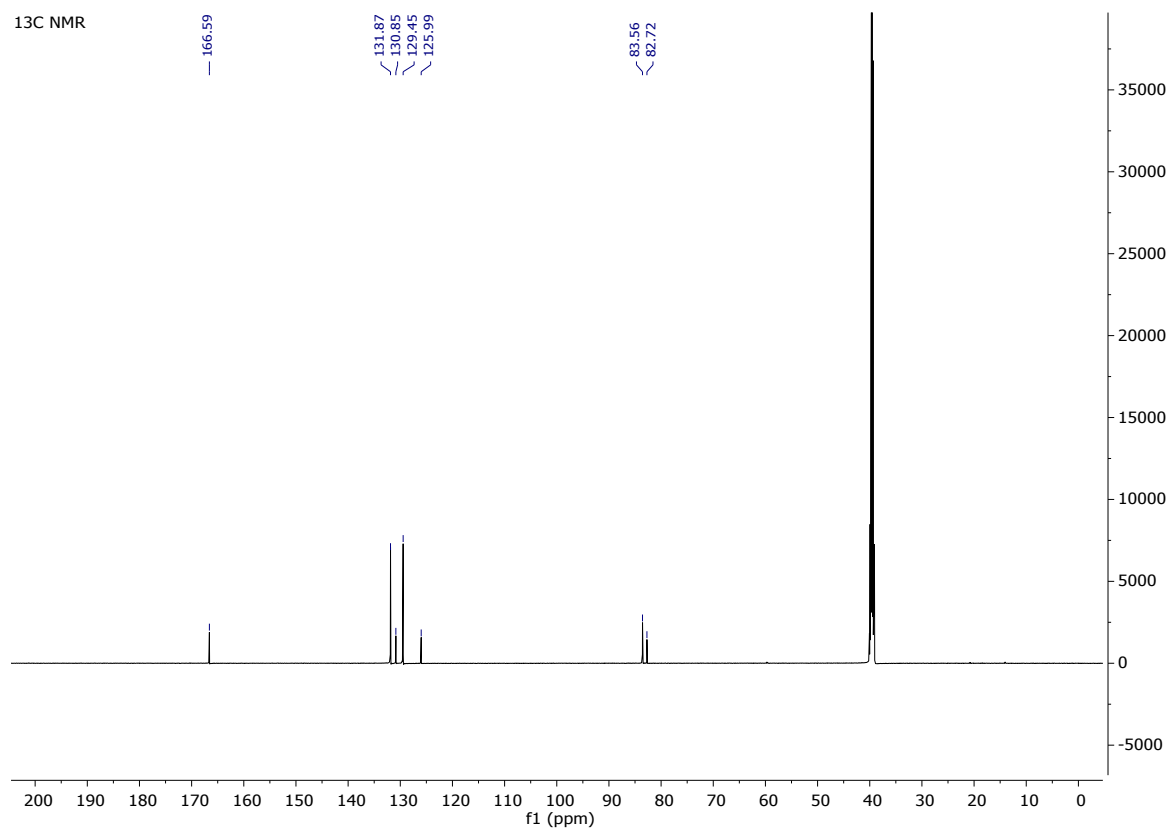

4-Ethynyl-N-(6-(6-(pyridin-2-yl)-1,2,4,5-tetrazin-3-yl)pyridin-3-yl)benzamide (II)

<sup>1</sup>H NMR

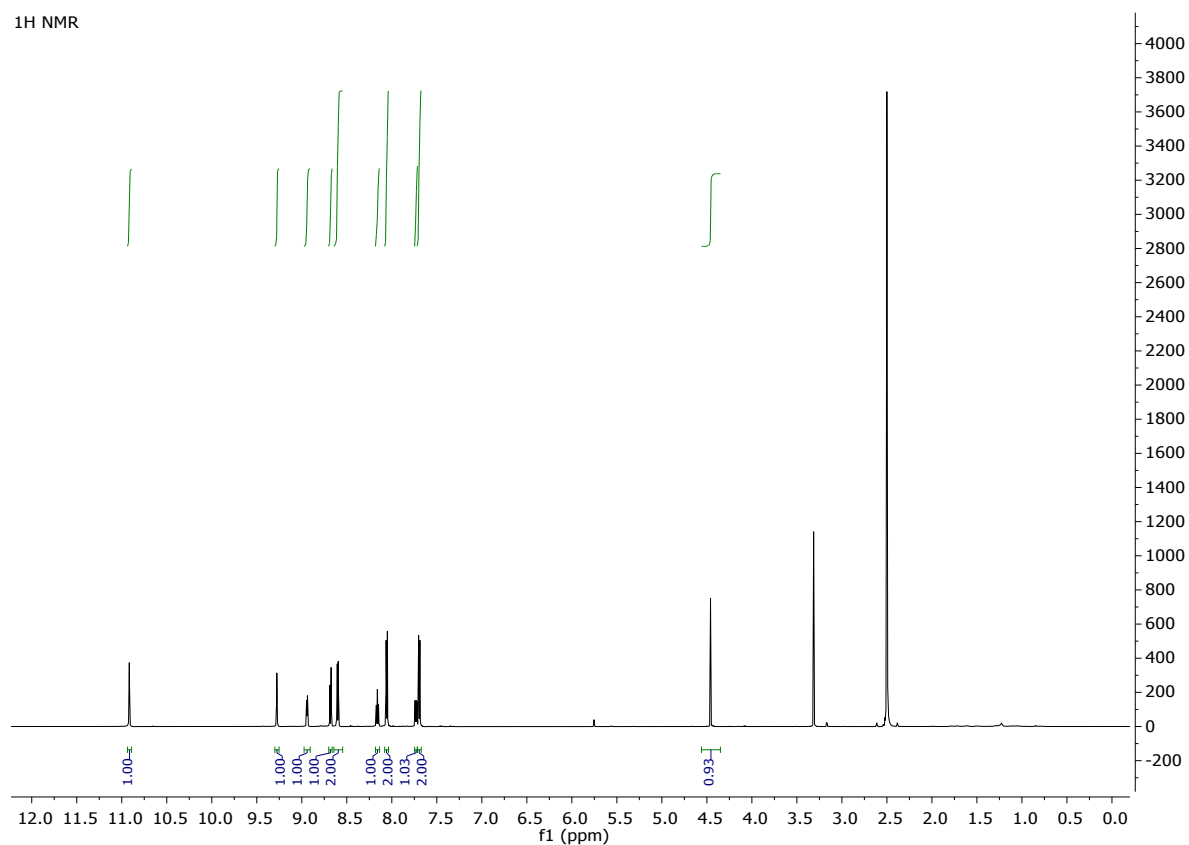

<sup>13</sup>C NMR

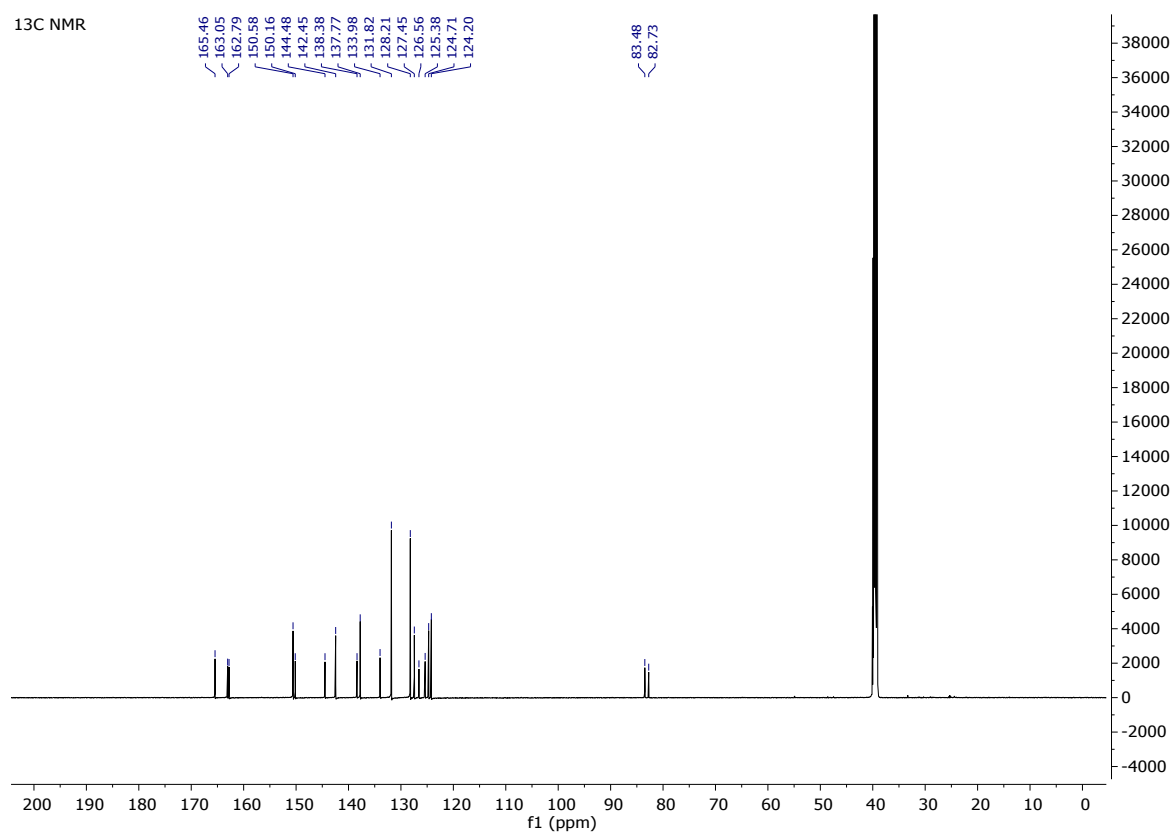



4-((Trimethylsilyl)ethynyl)benzonitrile (**S5**)

<sup>1</sup>H NMR

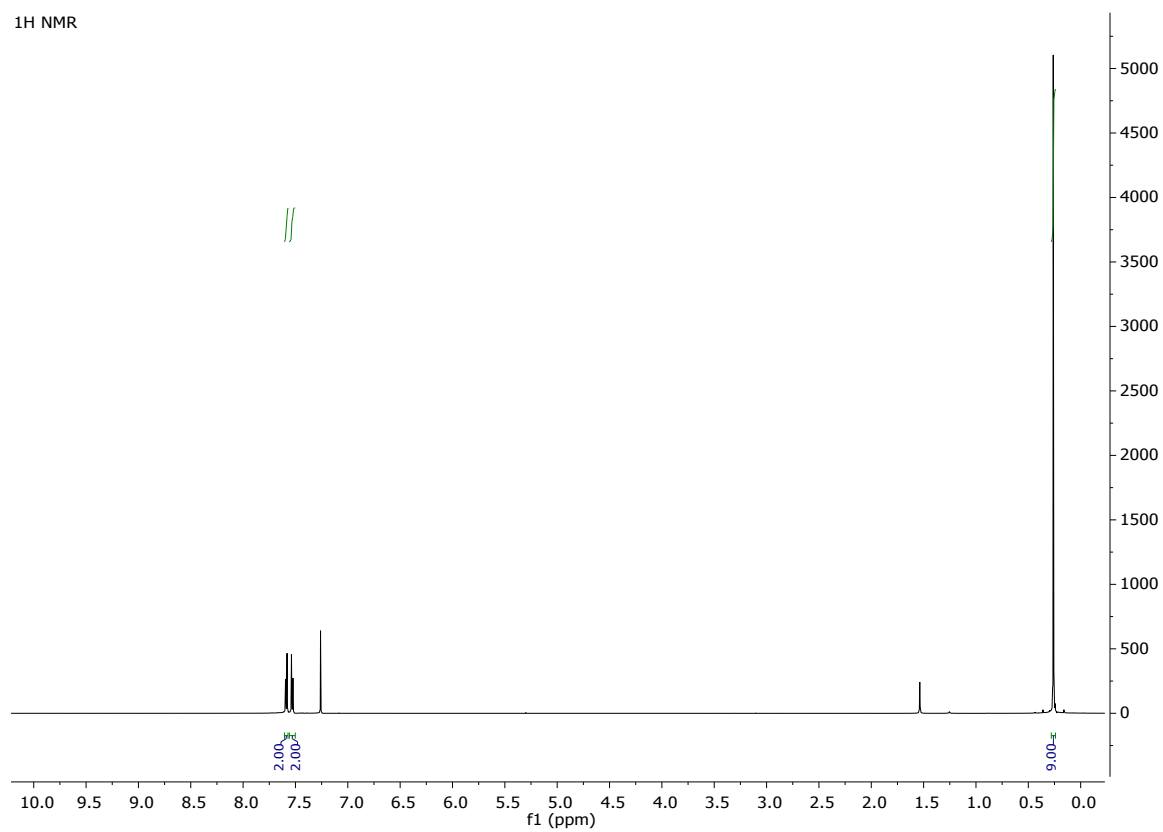

<sup>13</sup>C NMR

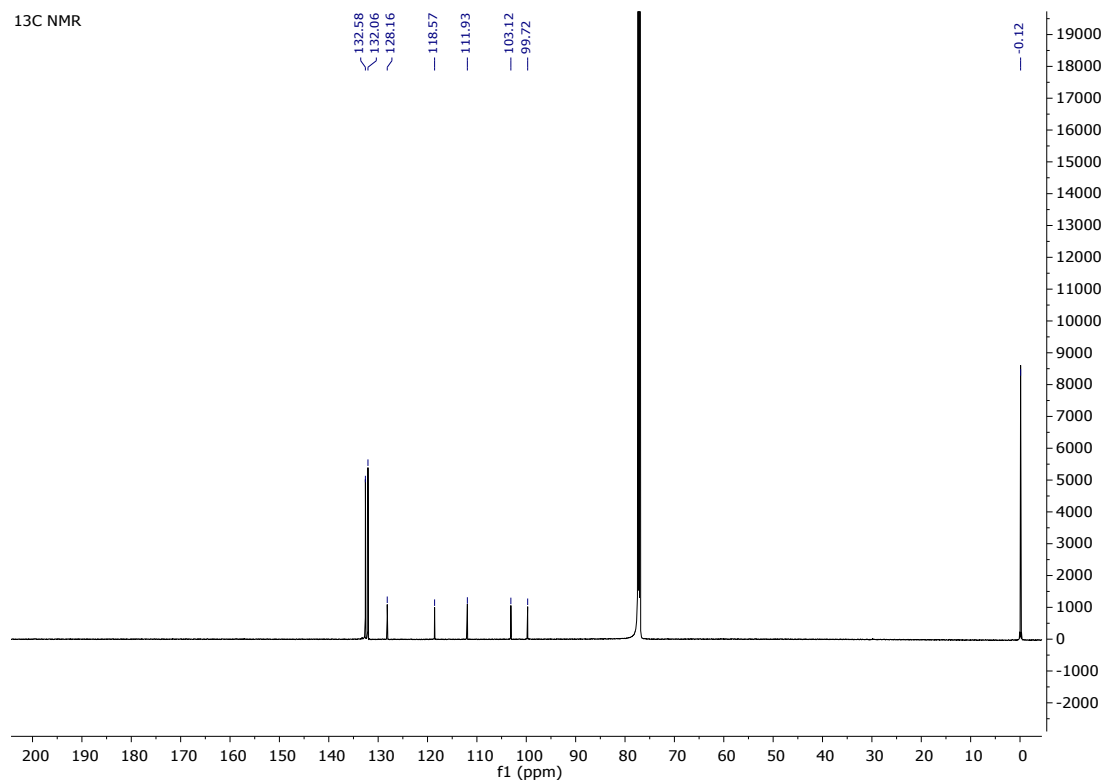

4-Ethynylbenzonitrile (S6)

<sup>1</sup>H NMR

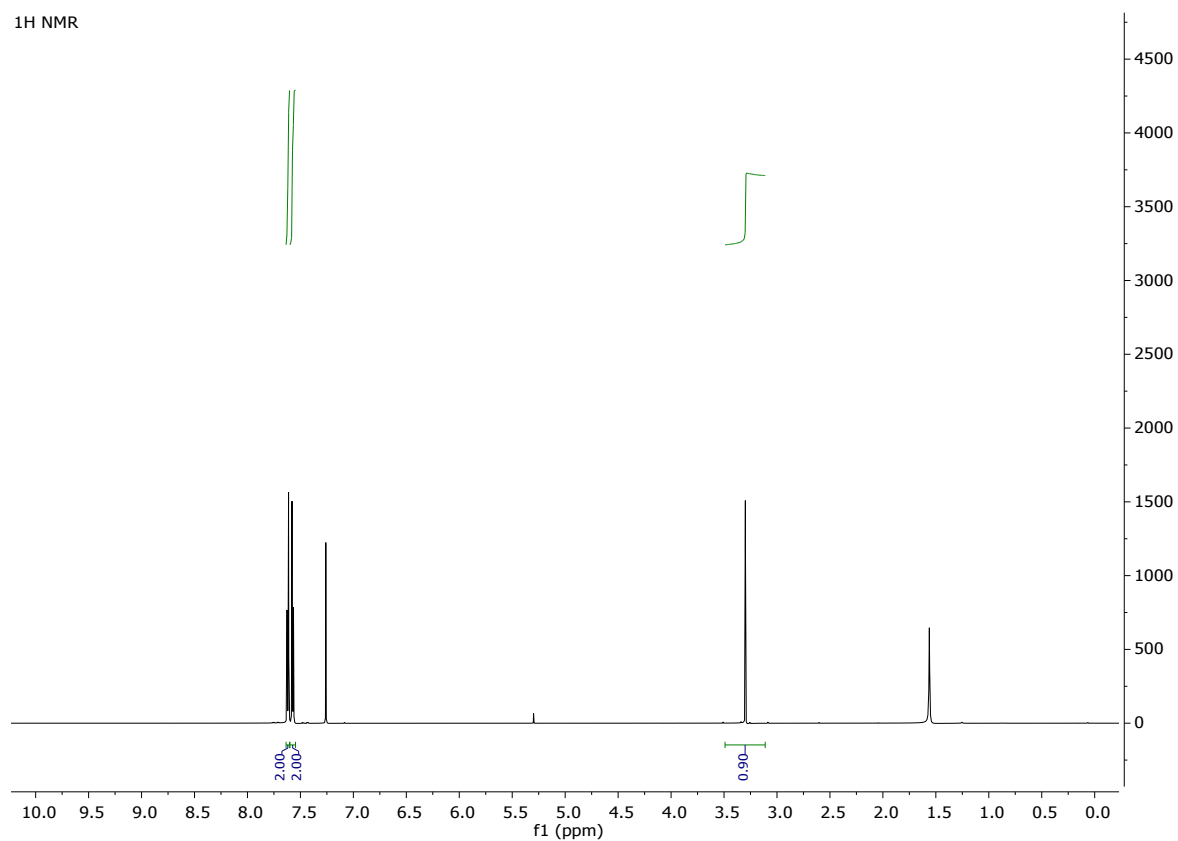

<sup>13</sup>C NMR

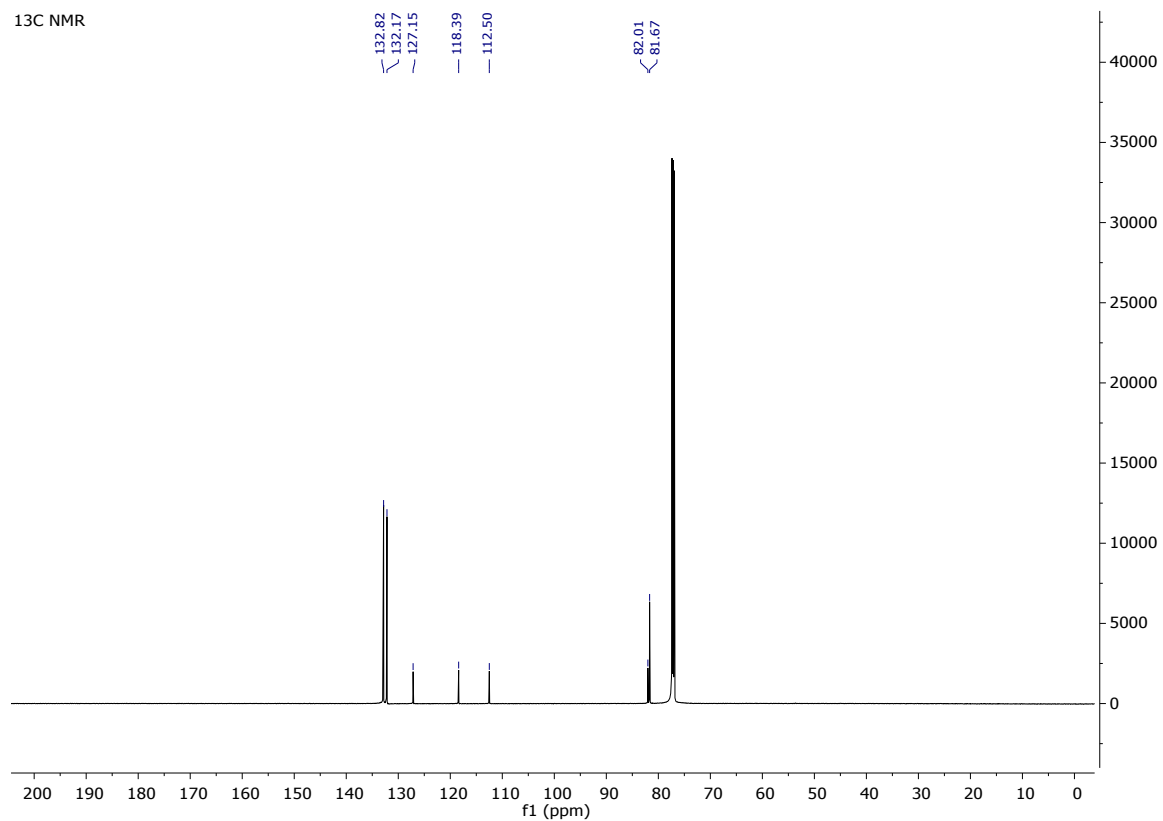

*Tert-butyl 2-(4-cyanophenoxy)acetate (S11)*

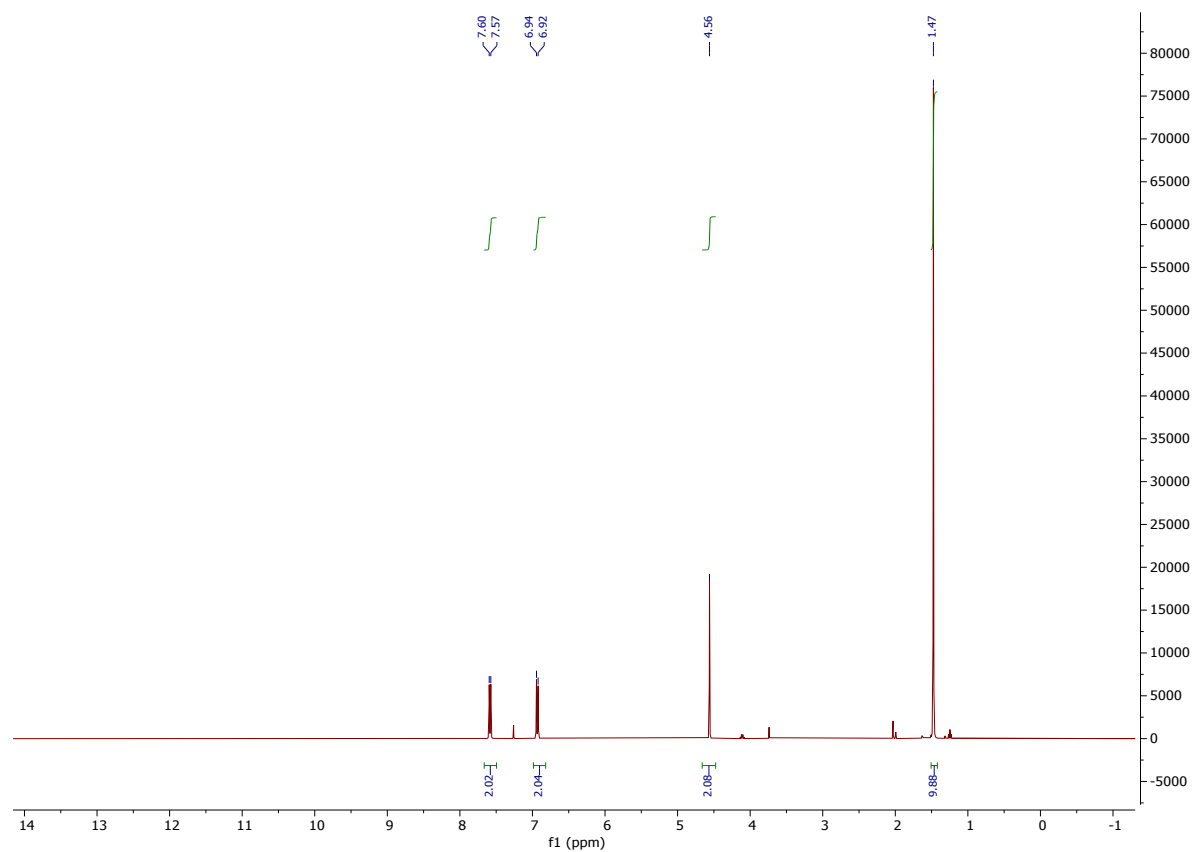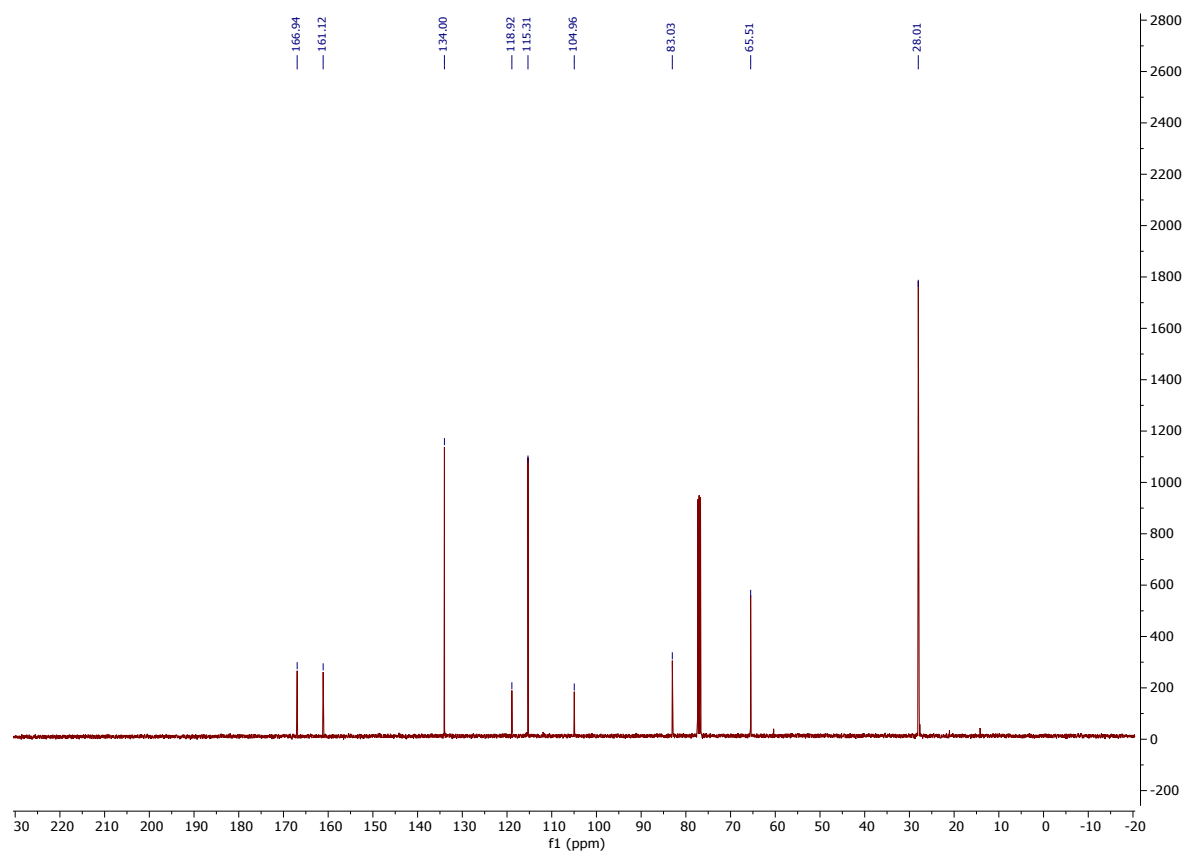

Tert-butyl 2-(4-(6-(pyridin-2-yl)-1,2,4,5-tetrazin-3-yl)phenoxy)acetate (S12)

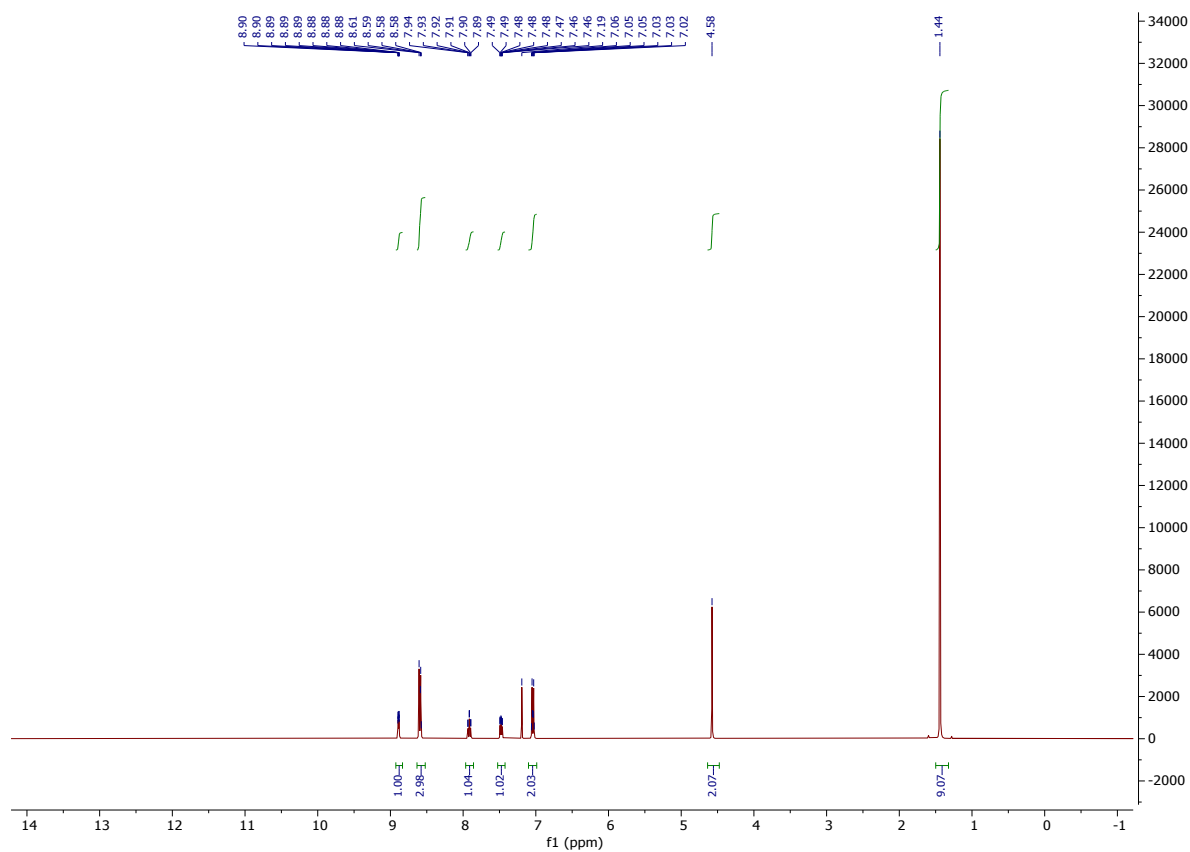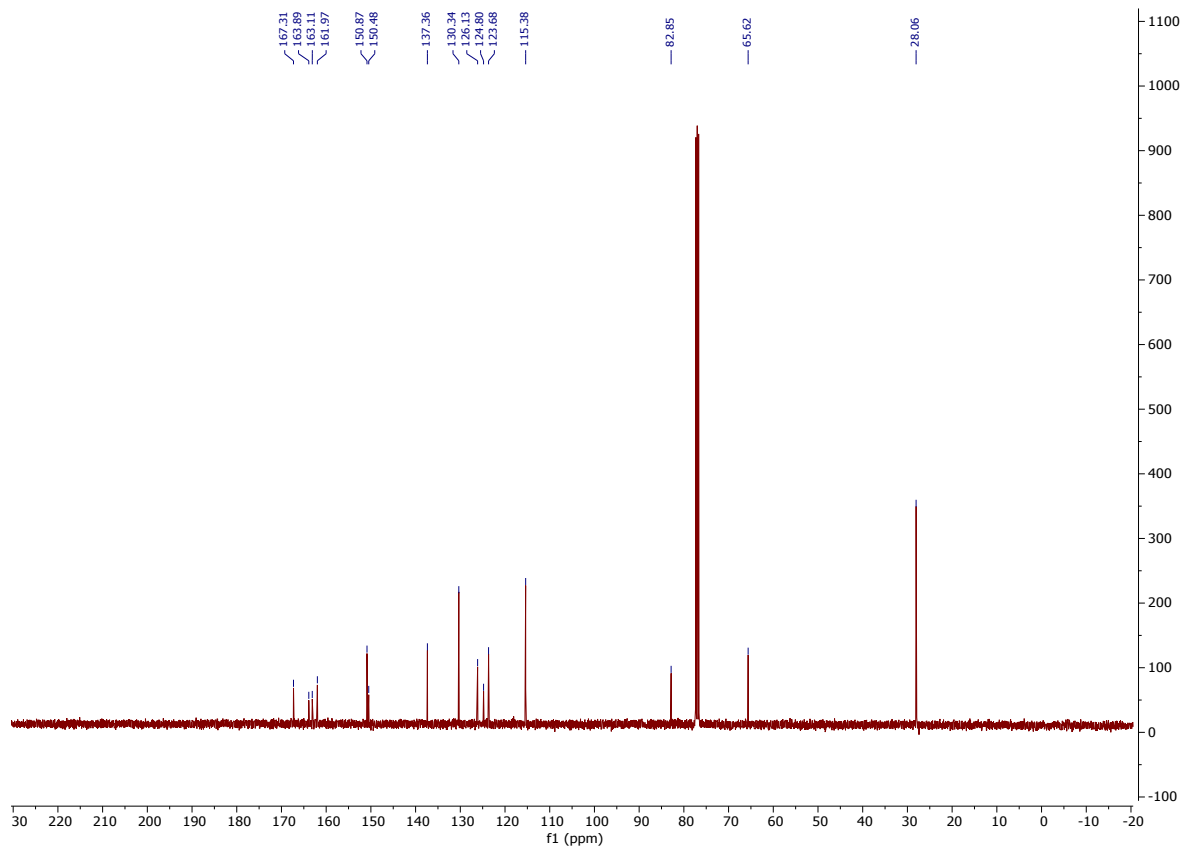

2-(4-Cyanophenoxy)acetic acid (S13)

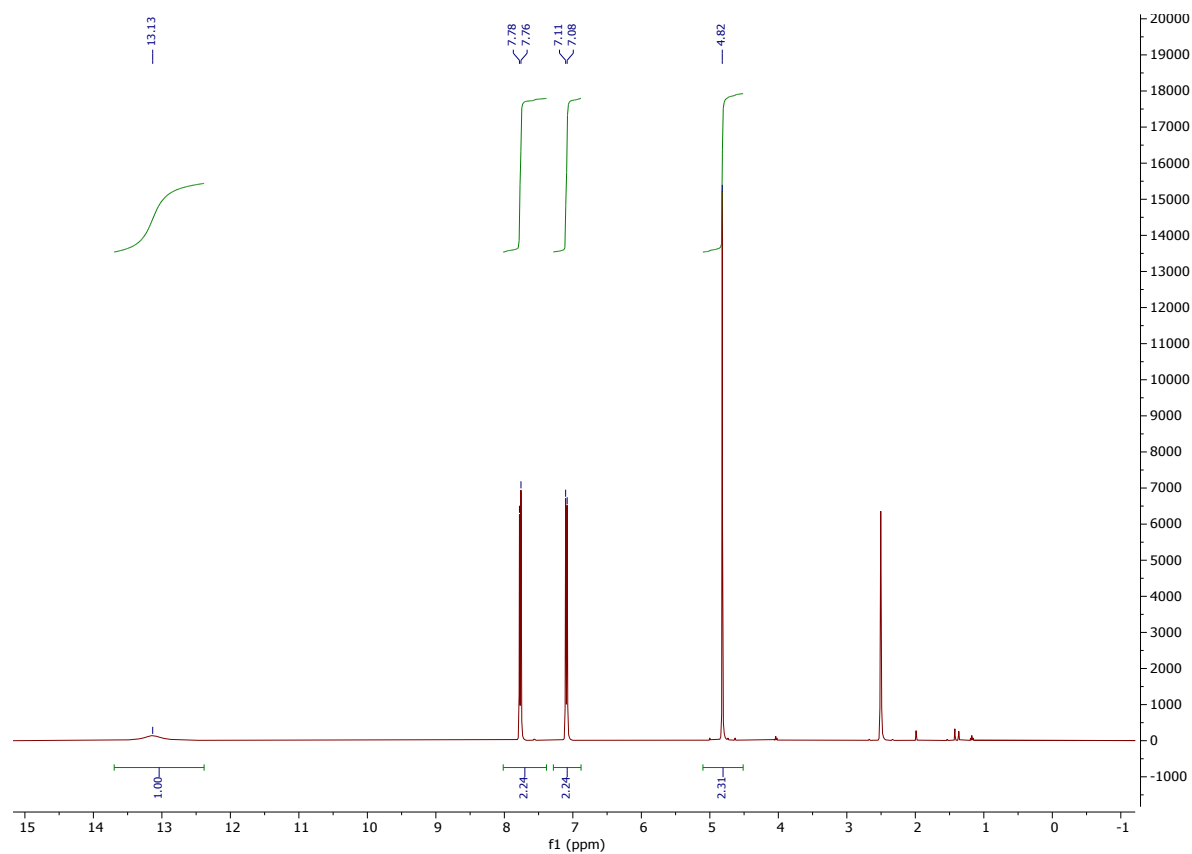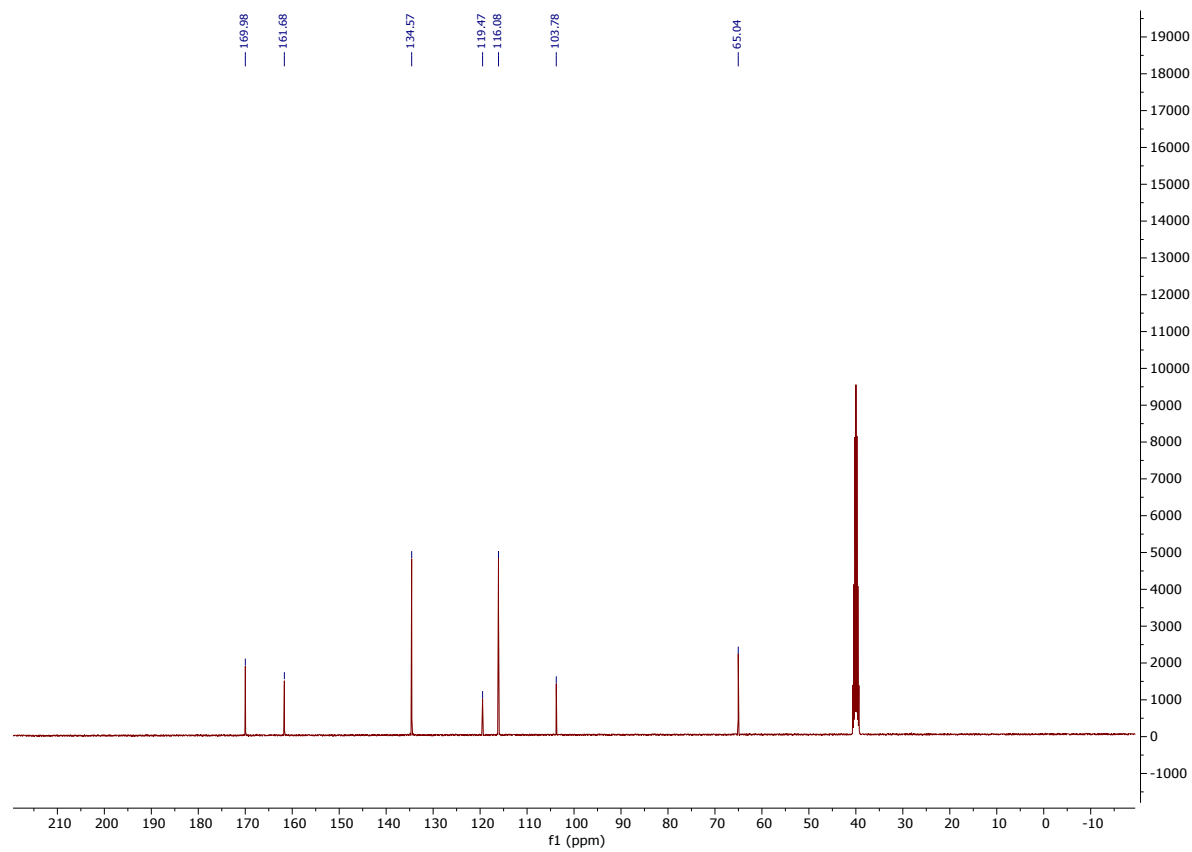

*Di-tert-butyl 2,2'-((2-(4-cyanophenoxy)acetyl)azanediyl)diacetate (S14)*

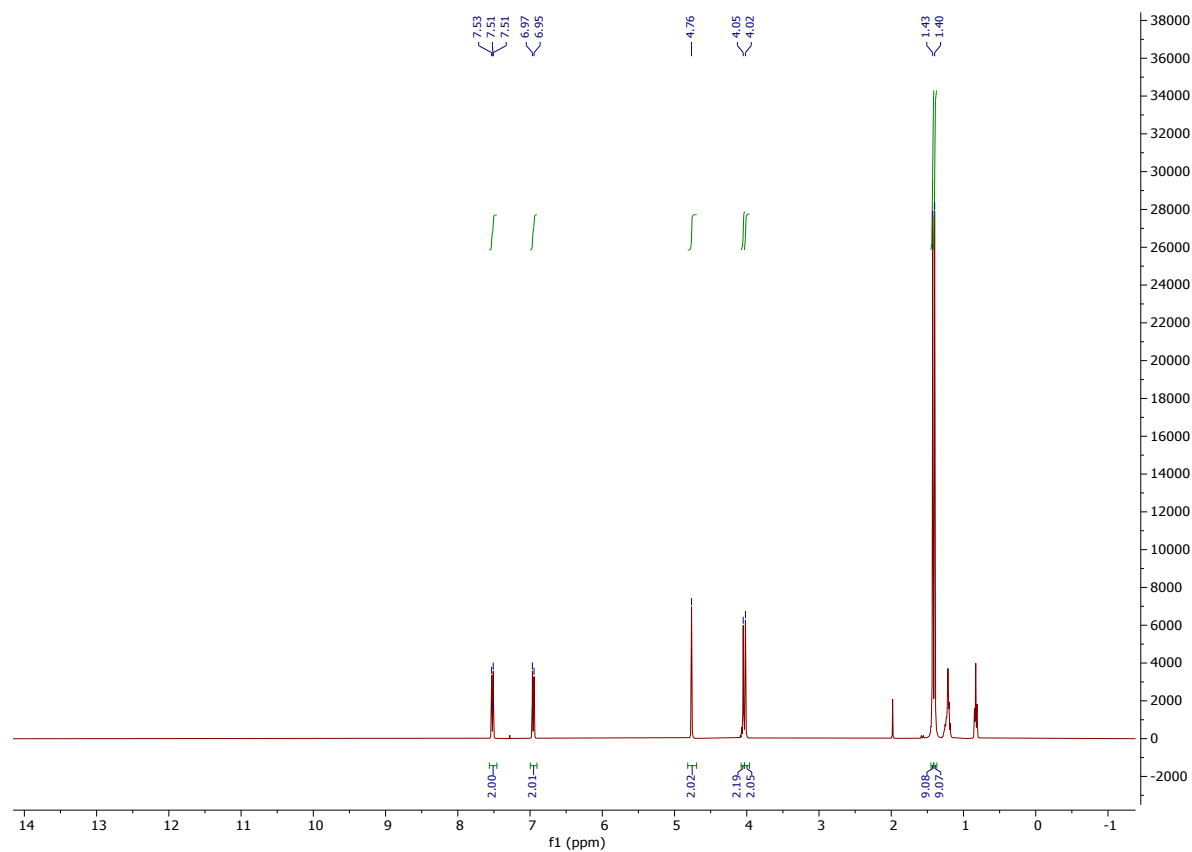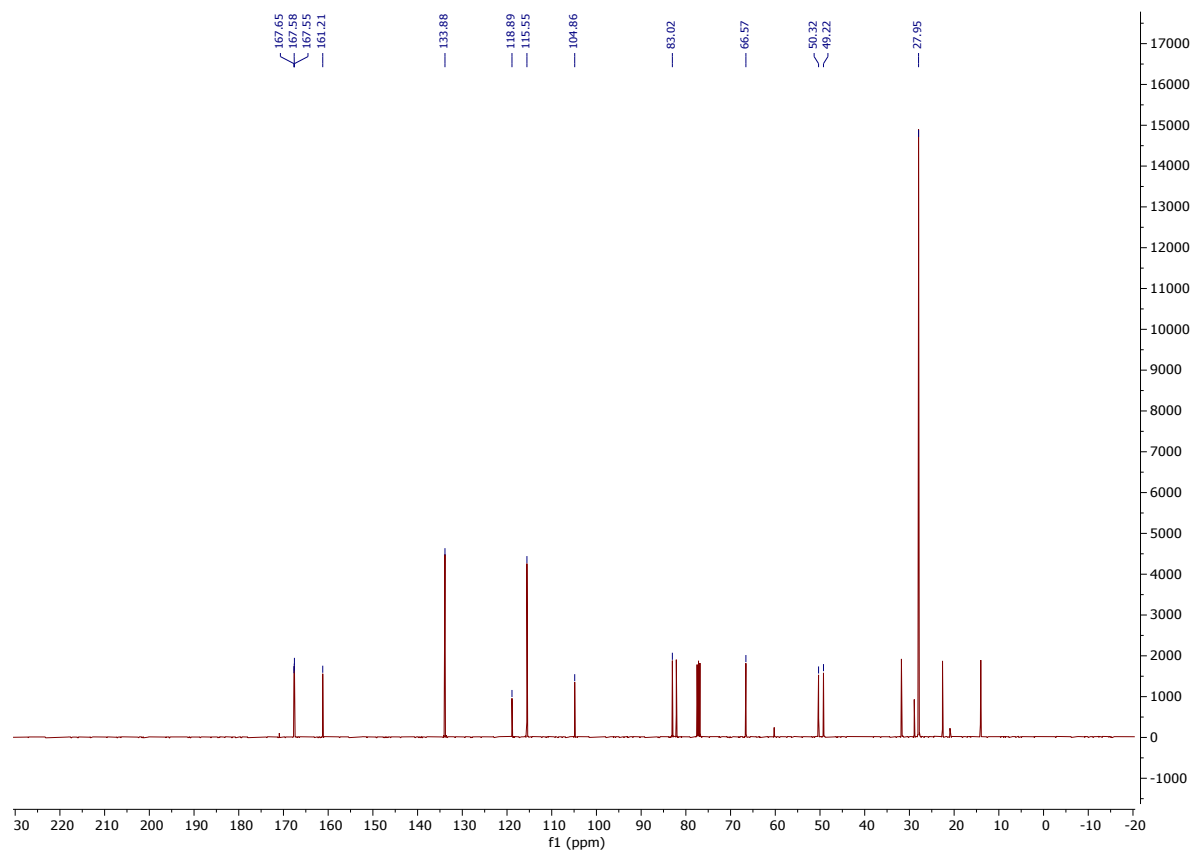

Di-tert-butyl 2,2'-((2-(4-(6-(pyridin-2-yl)-1,2,4,5-tetrazin-3-yl)phenoxy)acetyl)azanediyldiacetate (S15)

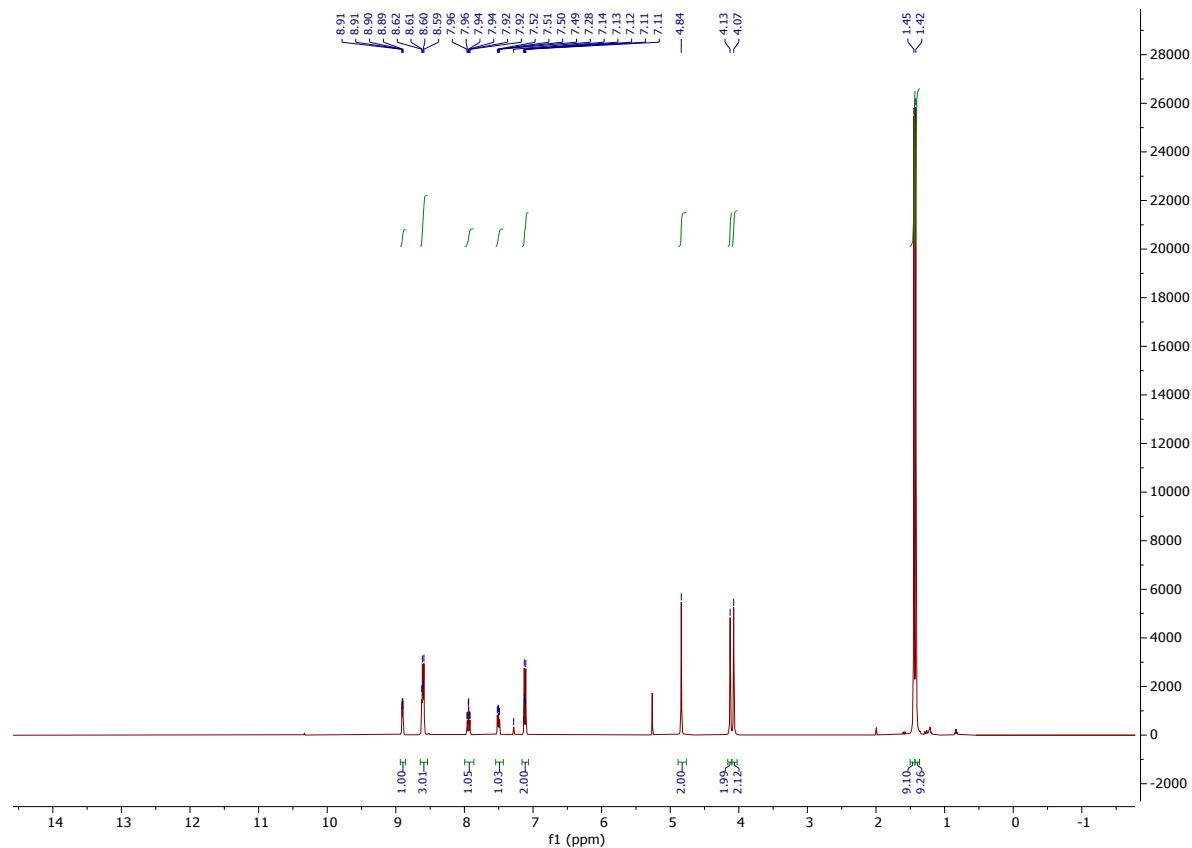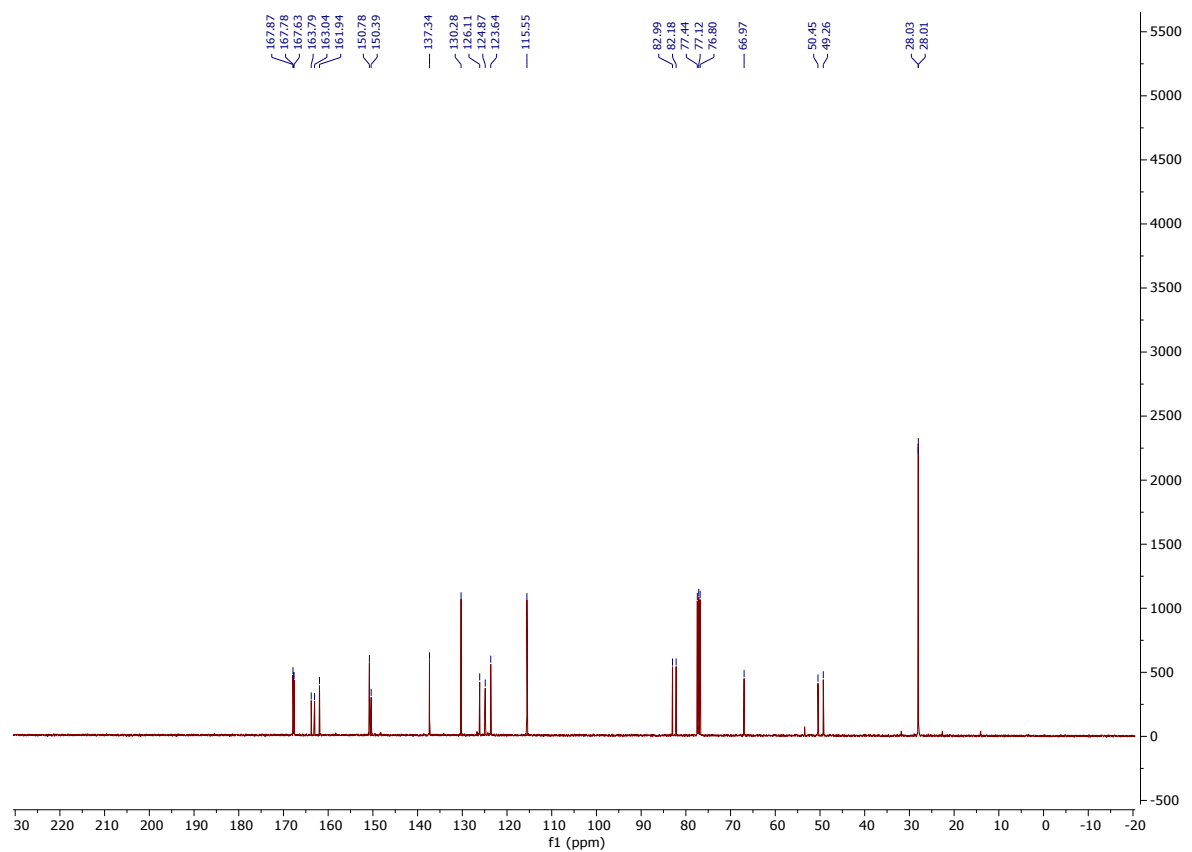

*3-(4-Ethynylphenyl)-1,2,4,5-tetrazine (III)*

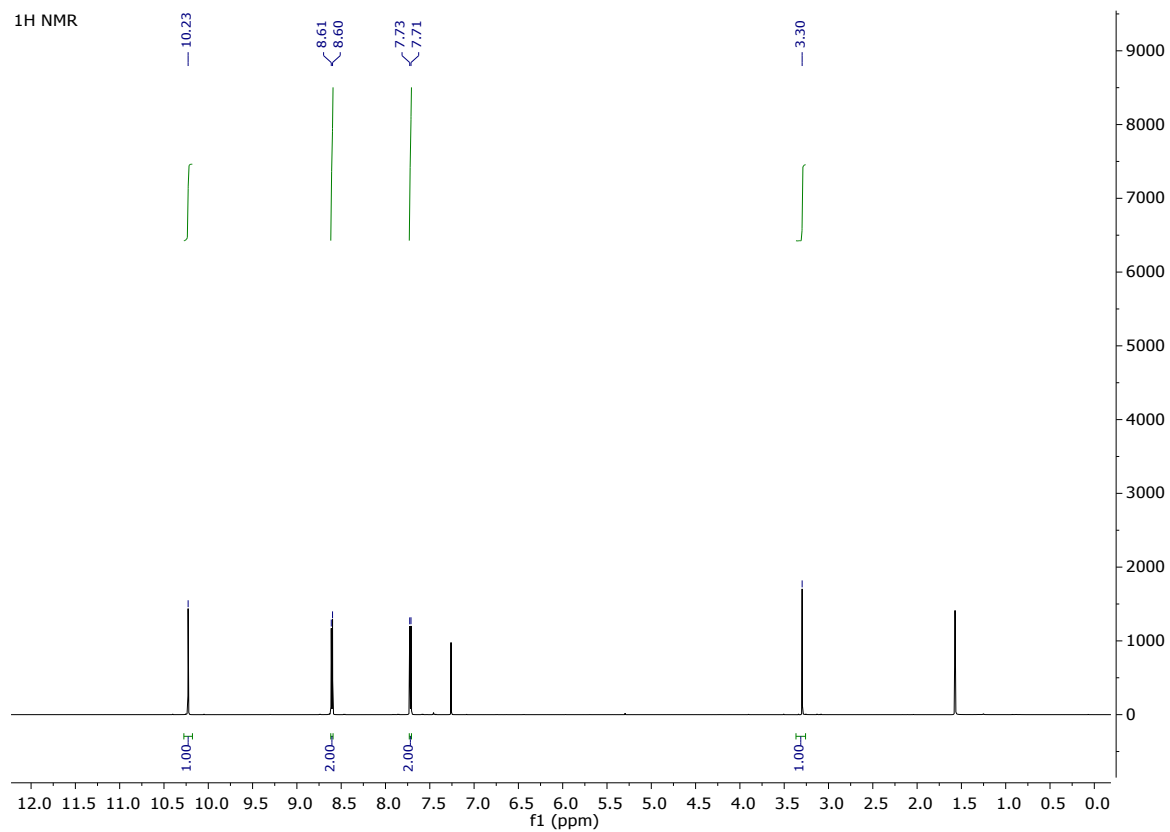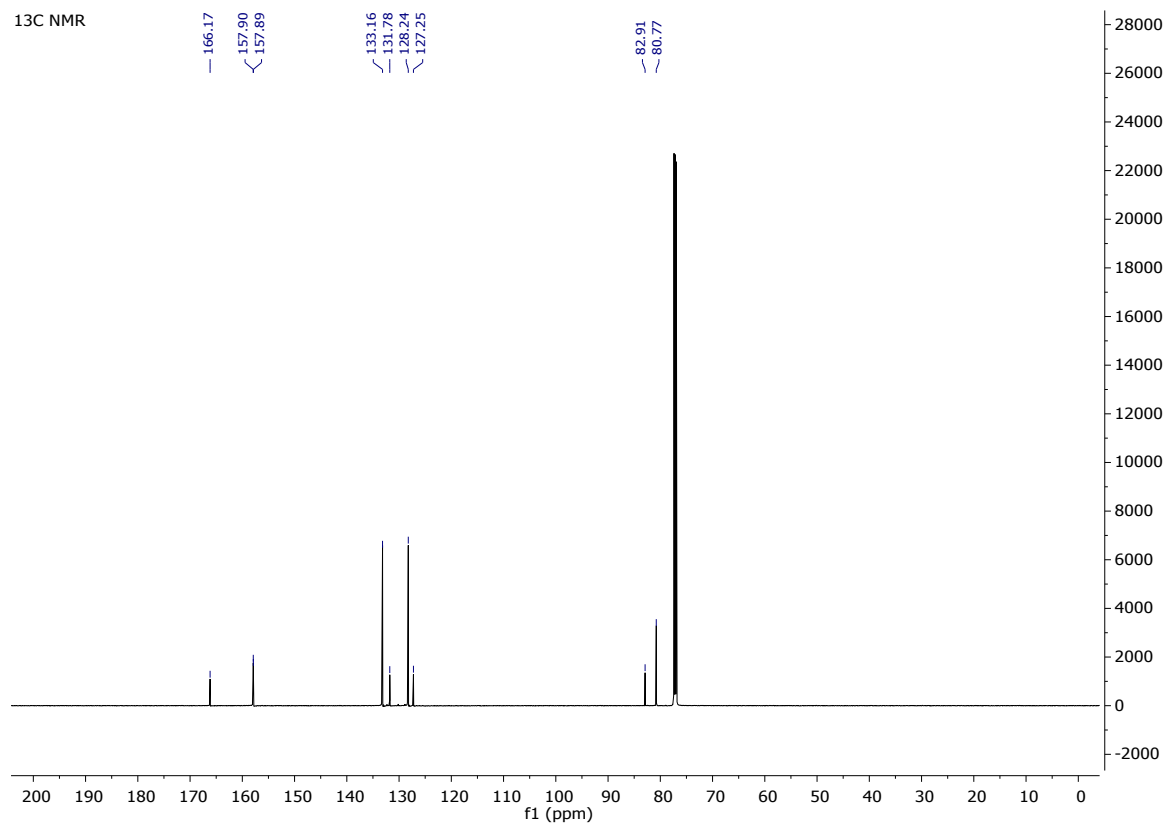



3-(4-(Prop-2-yn-1-yloxy)phenyl)-1,2,4,5-tetrazine (IV)

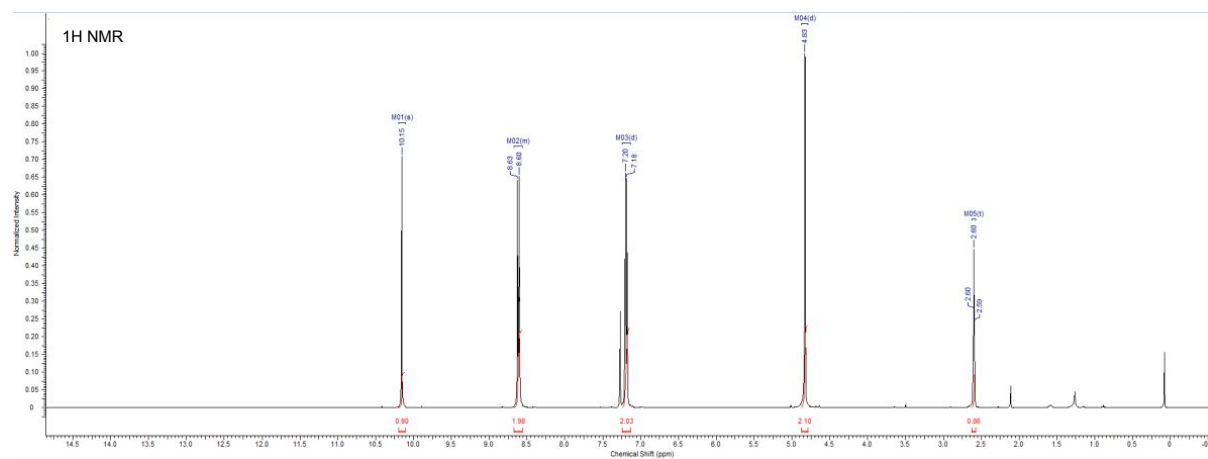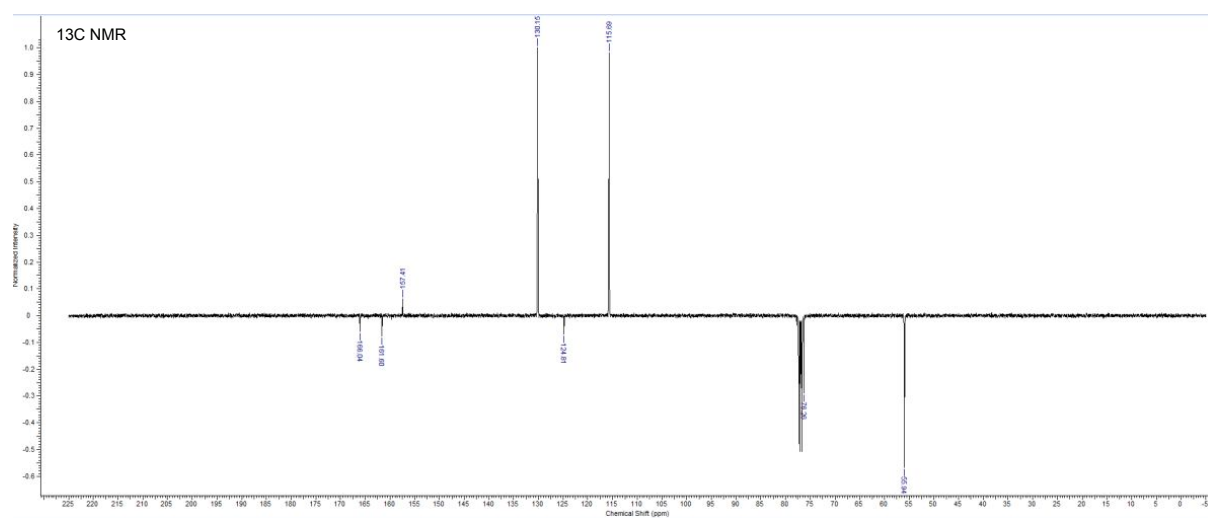

3-(4-(Prop-2-yn-1-yloxy)phenyl)-6-(pyridin-2-yl)-1,2,4,5-tetrazine (V)

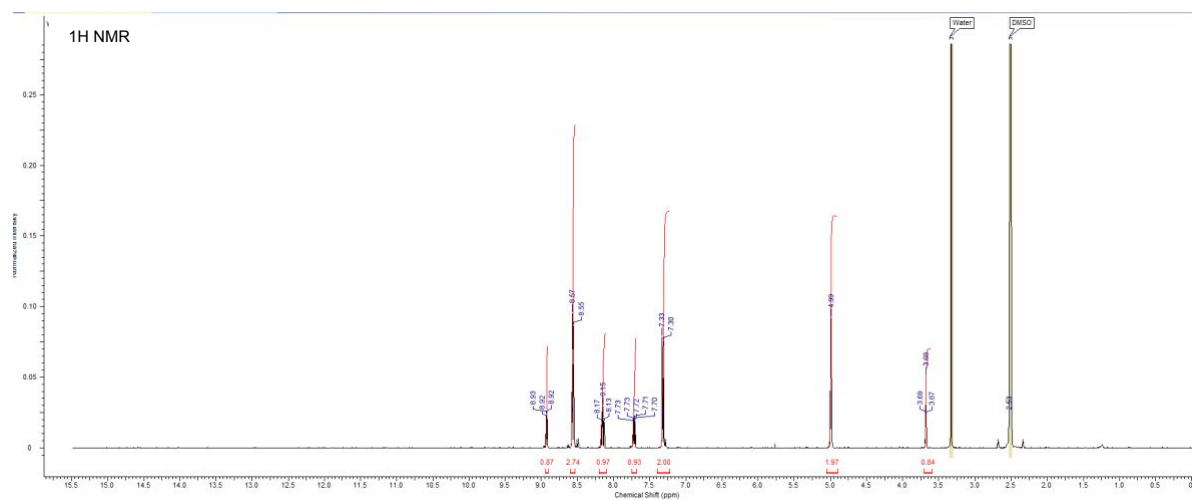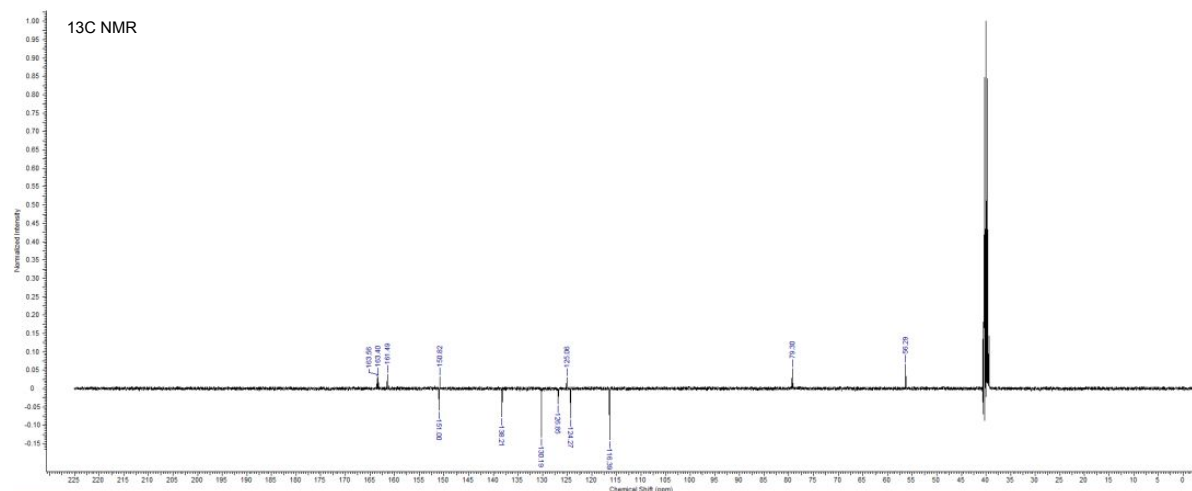

3-methyl-6-(4-(prop-2-yn-1-yloxy)phenyl)-1,2,4,5-tetrazine (VI)

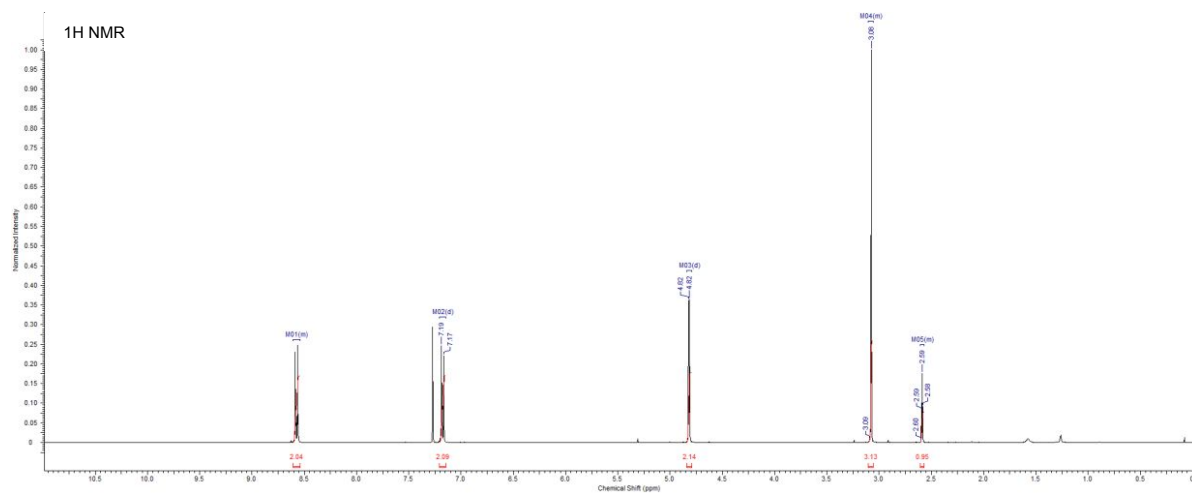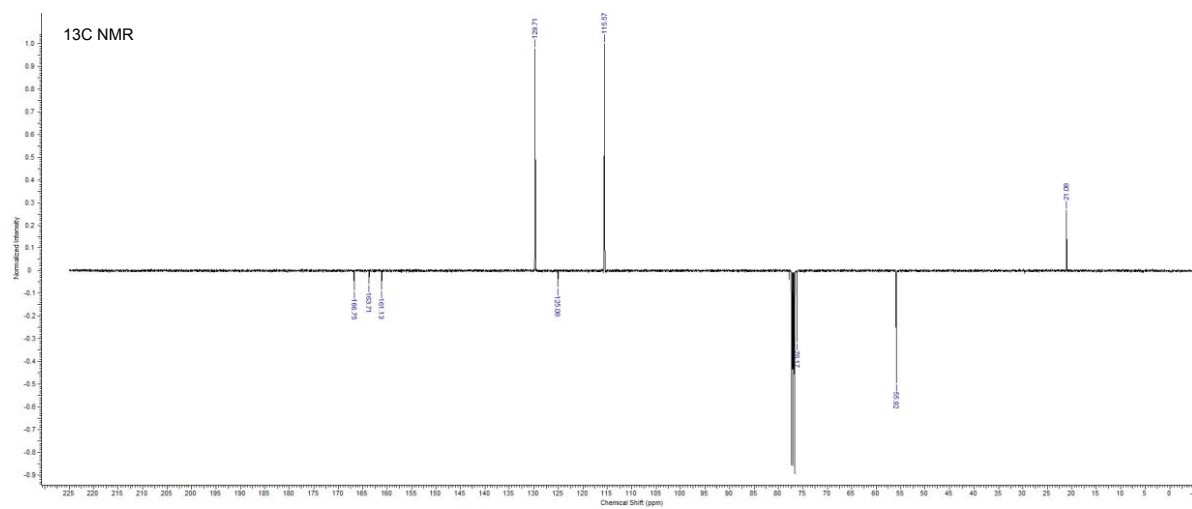

2,3,4-Tri-O-acetyl-6-O-(4-nitrobenzoyl)- $\beta$ -D-glucosyl azide (**pAz3**)

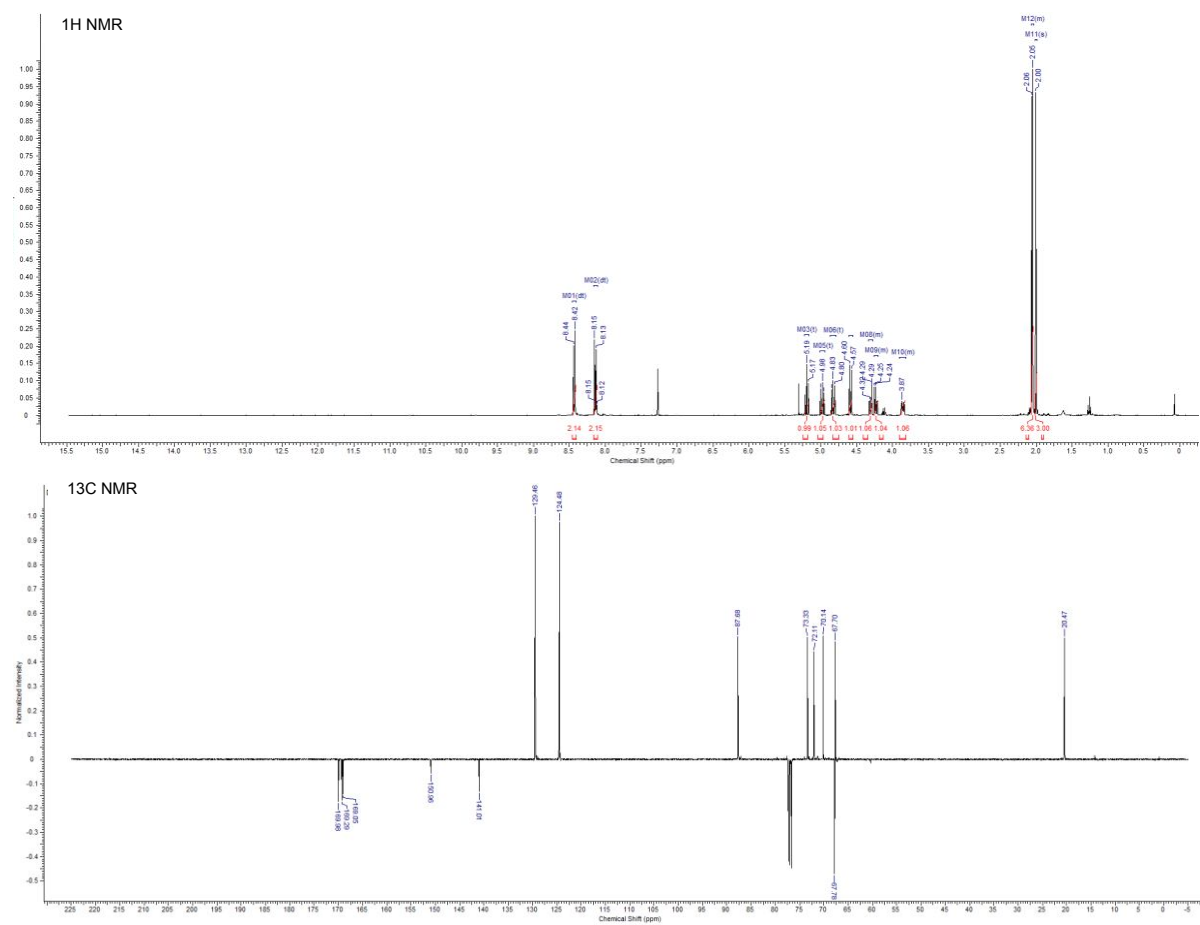

4-(1-(2-Fluoroethyl)-1H-1,2,3-triazol-4-yl)benzoic acid (S18)

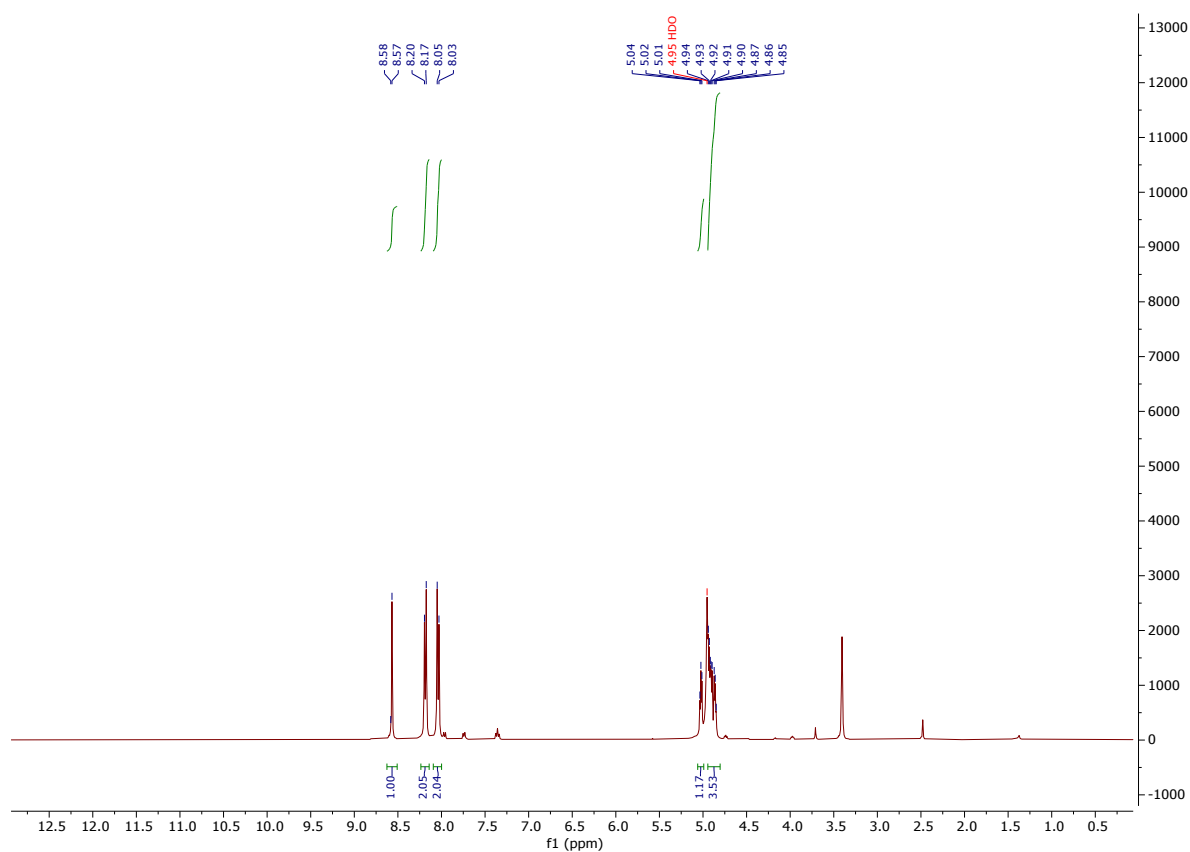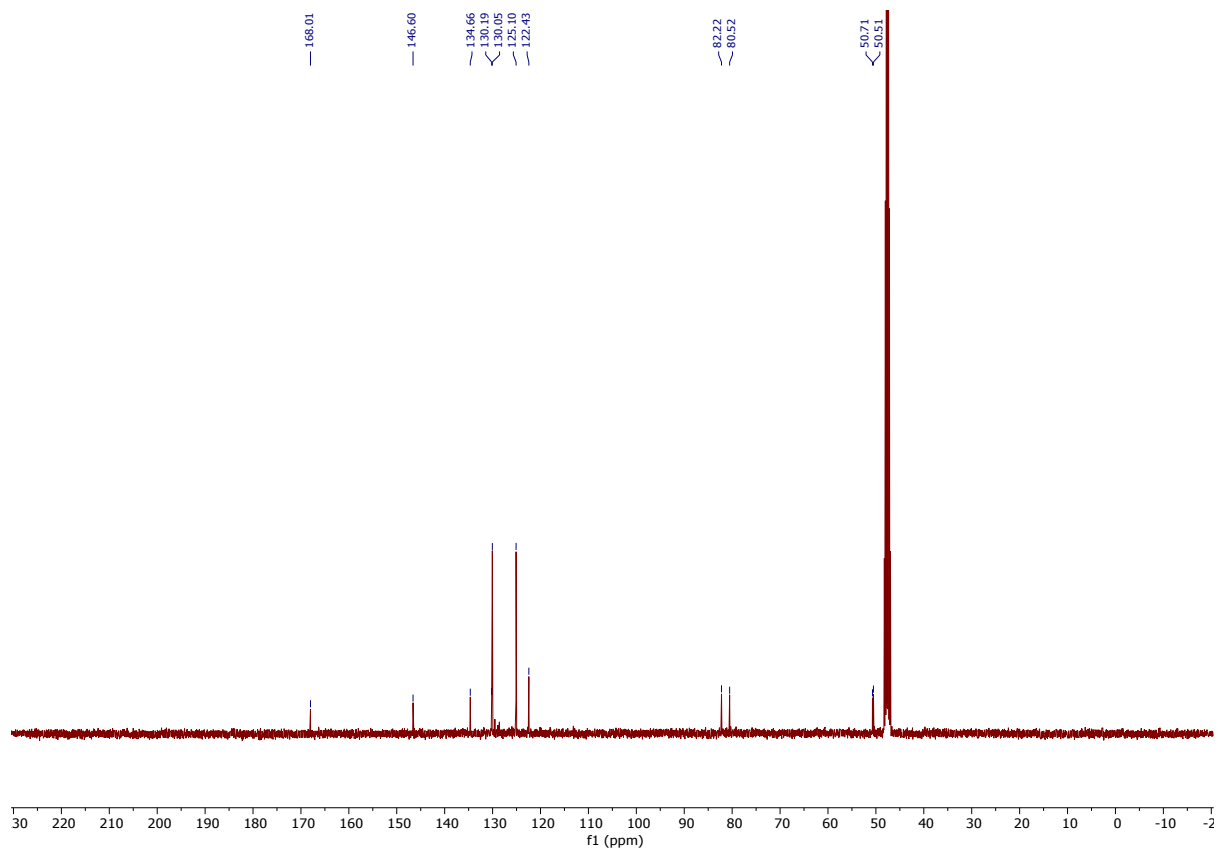

4-(1-(2-(2-(2-(2-Fluoroethoxy)ethoxy)ethoxy)ethyl)-1H-1,2,3-triazol-4-yl)benzoic acid (S19)

<sup>1</sup>H NMR

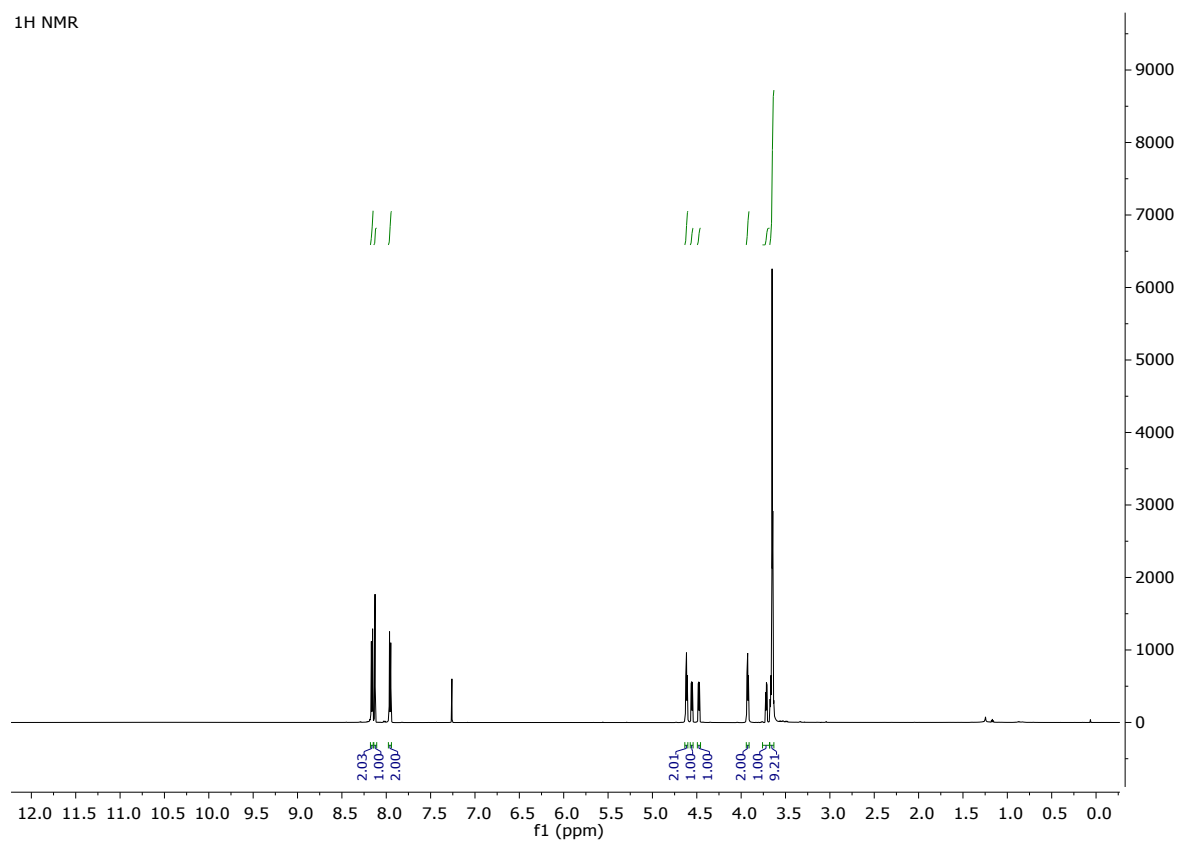

<sup>13</sup>C NMR

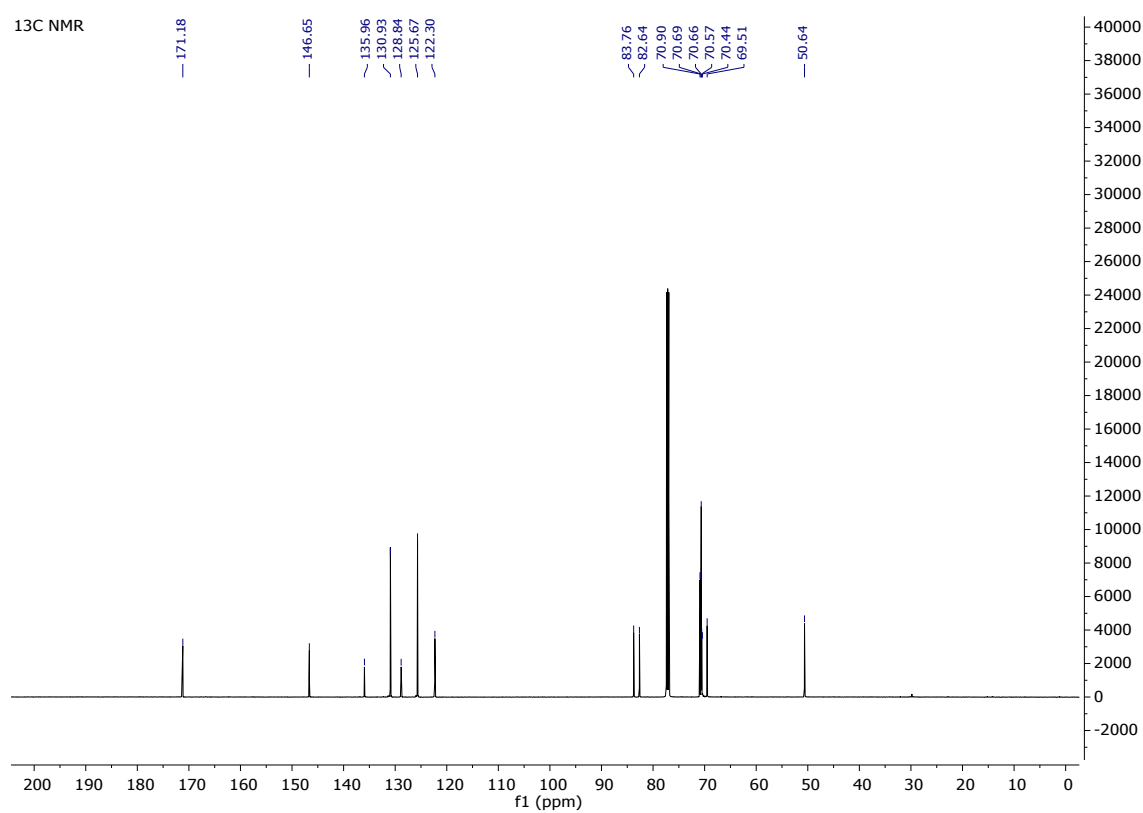



2-(4-Cyanophenyl)-N-(2-fluoroethyl)acetamide (S23)

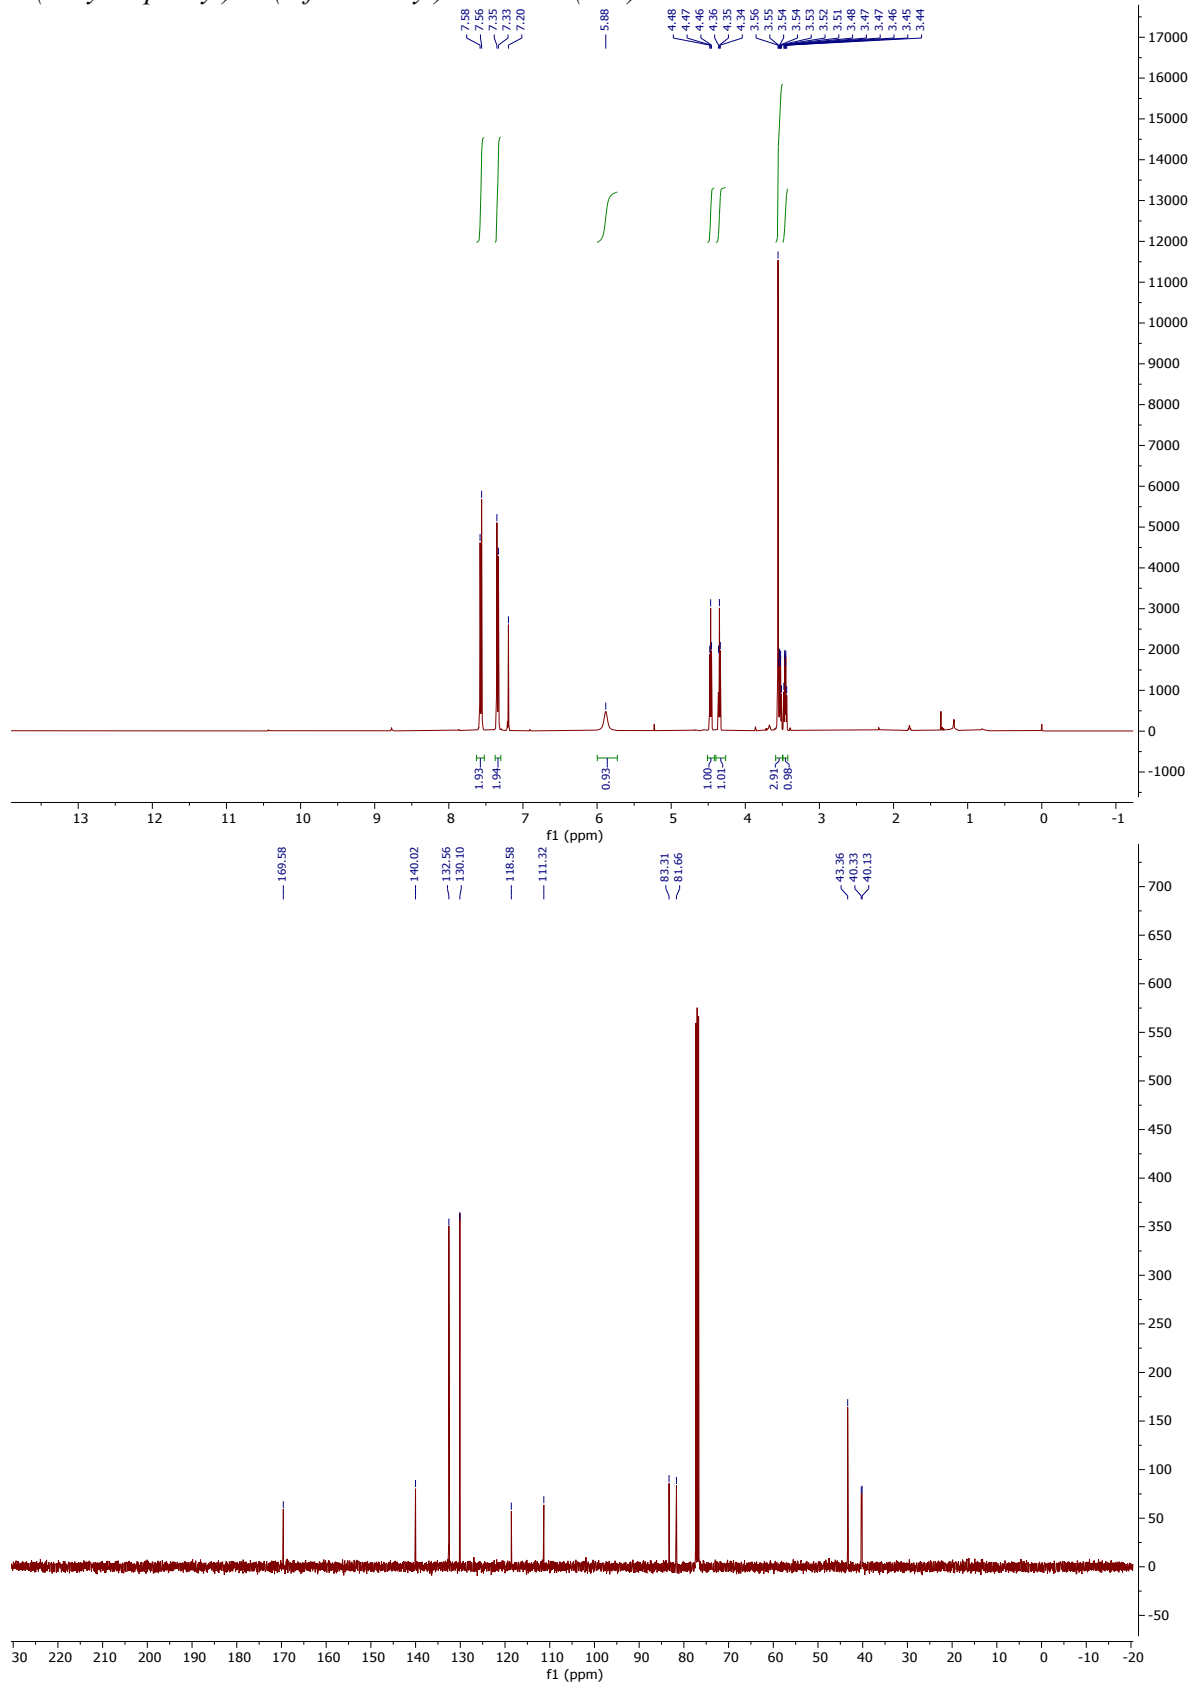



4-(((2-Fluoroethyl)amino)methyl)benzonitrile (S25)

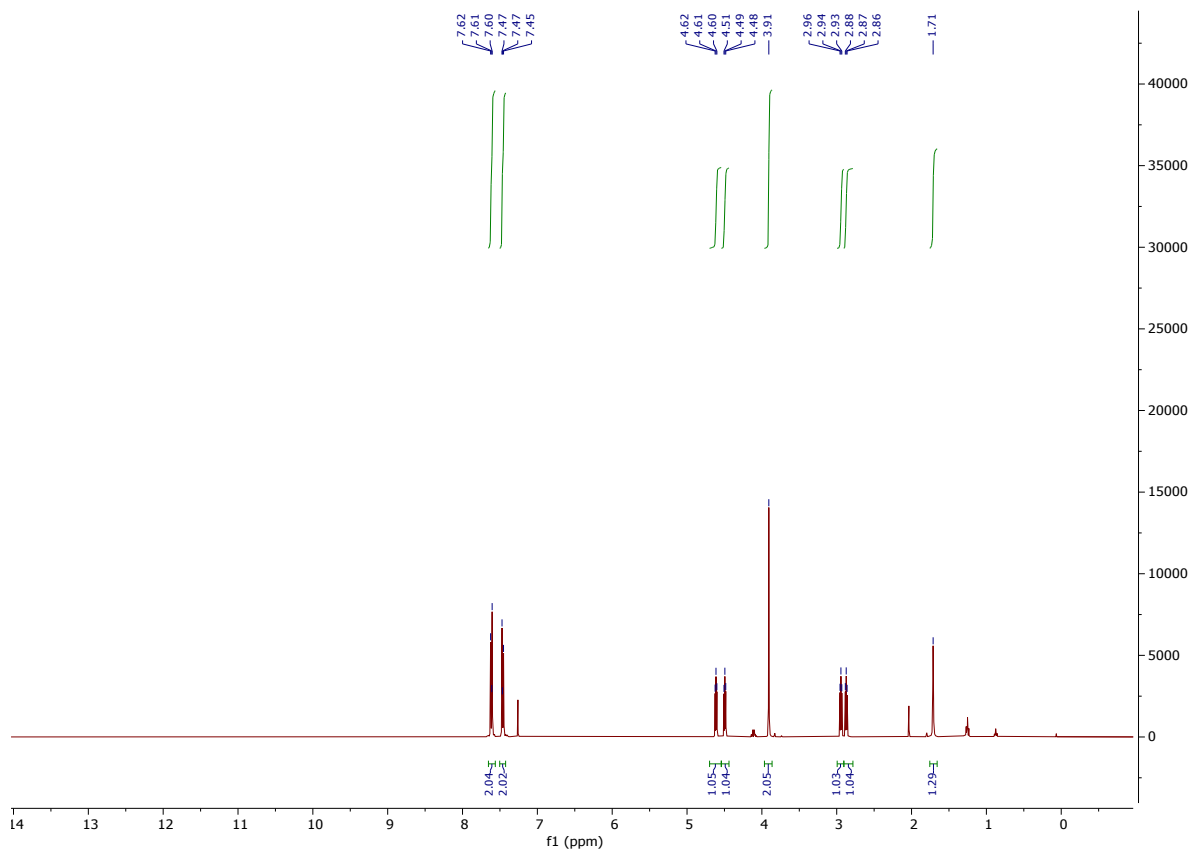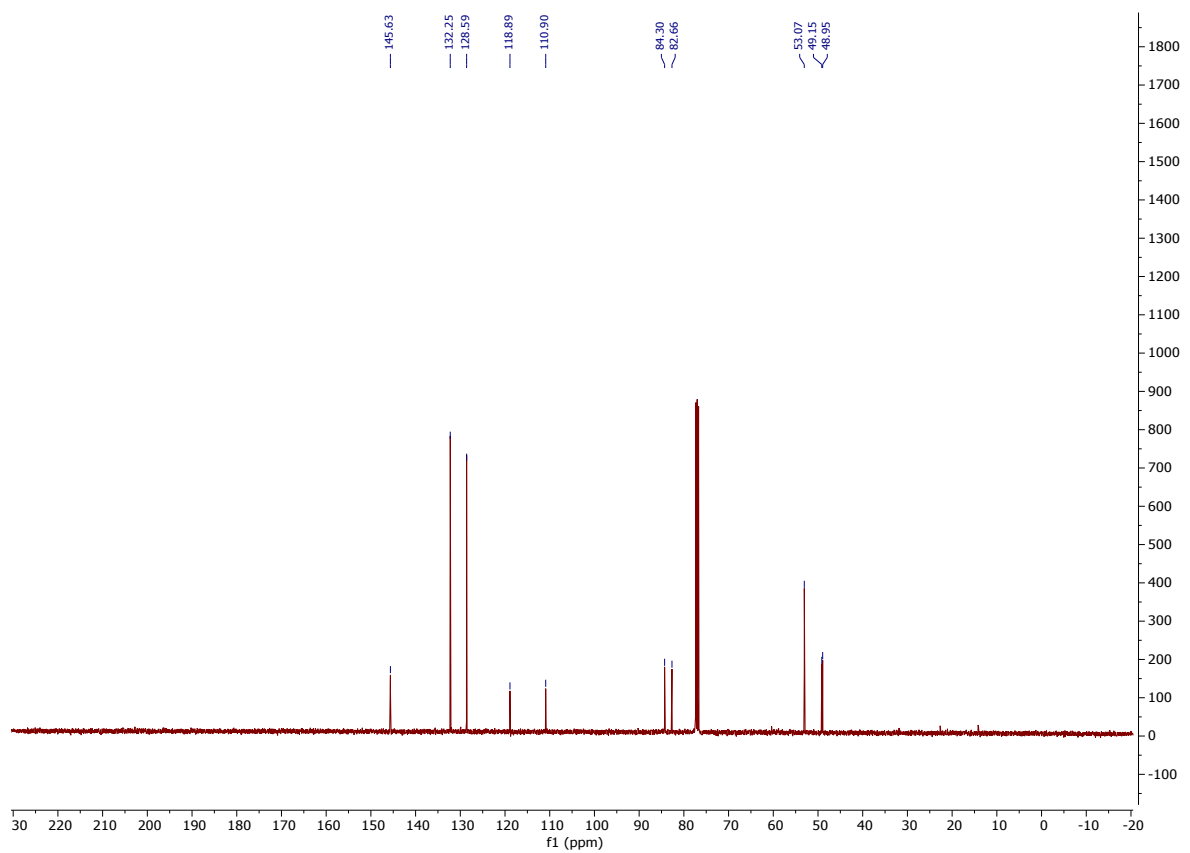

*Tert-butyl 4-cyanobenzyl(2-fluoroethyl)carbamate (S26)*

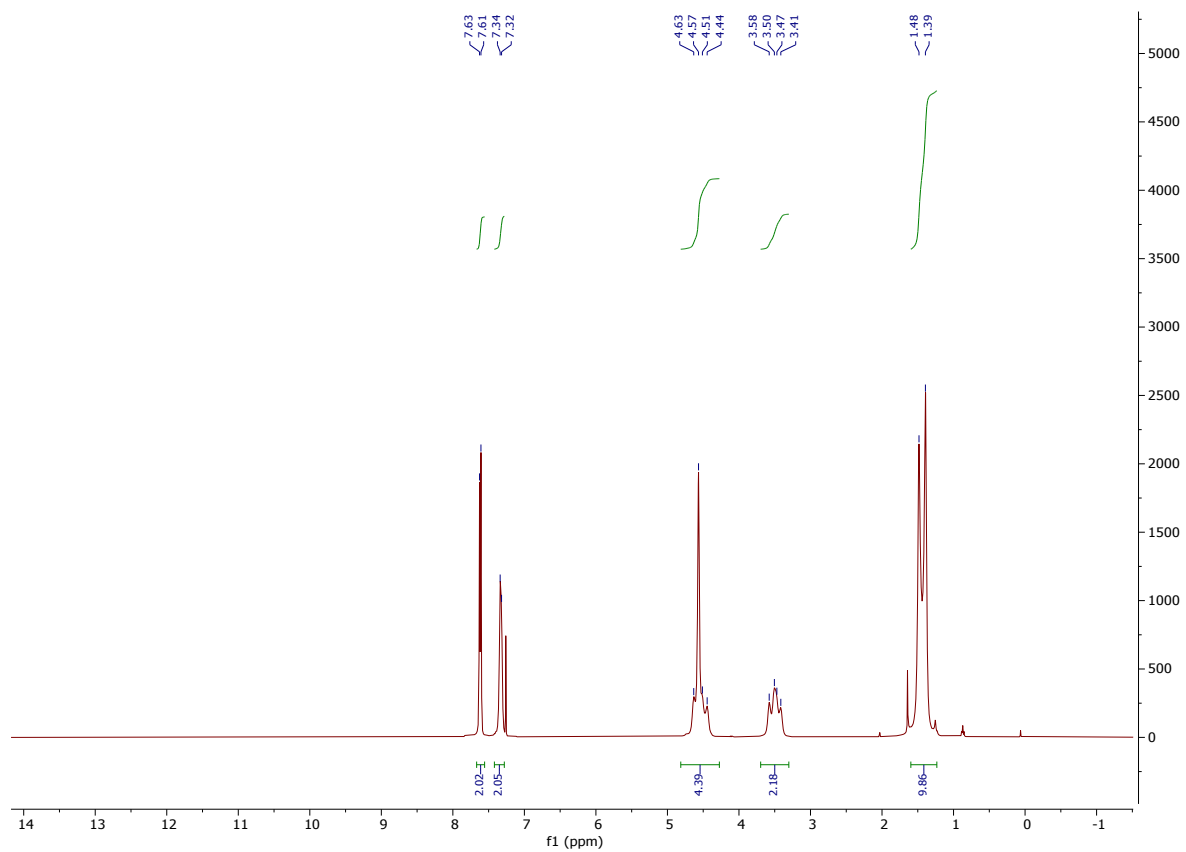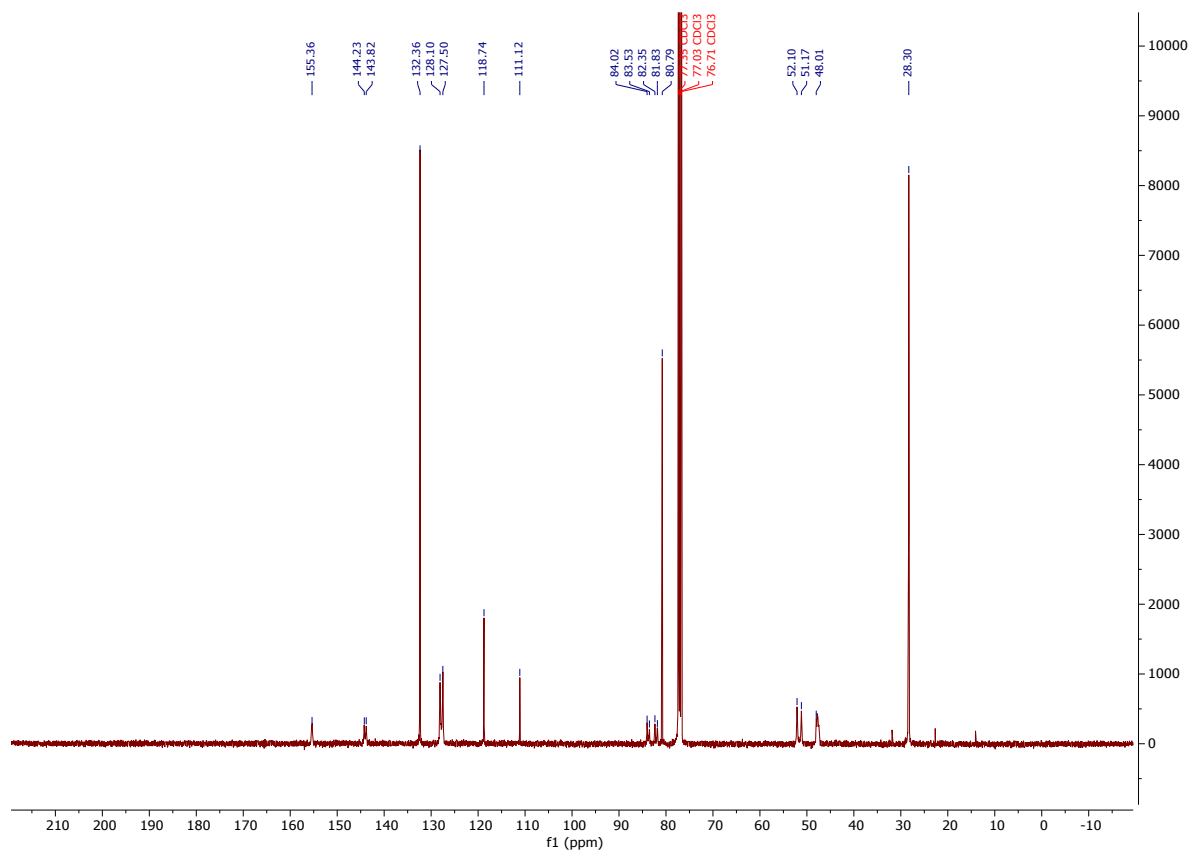

*Tert-butyl 4-(1,2,4,5-tetrazin-3-yl)benzyl(2-fluoroethyl)carbamate (S27)*

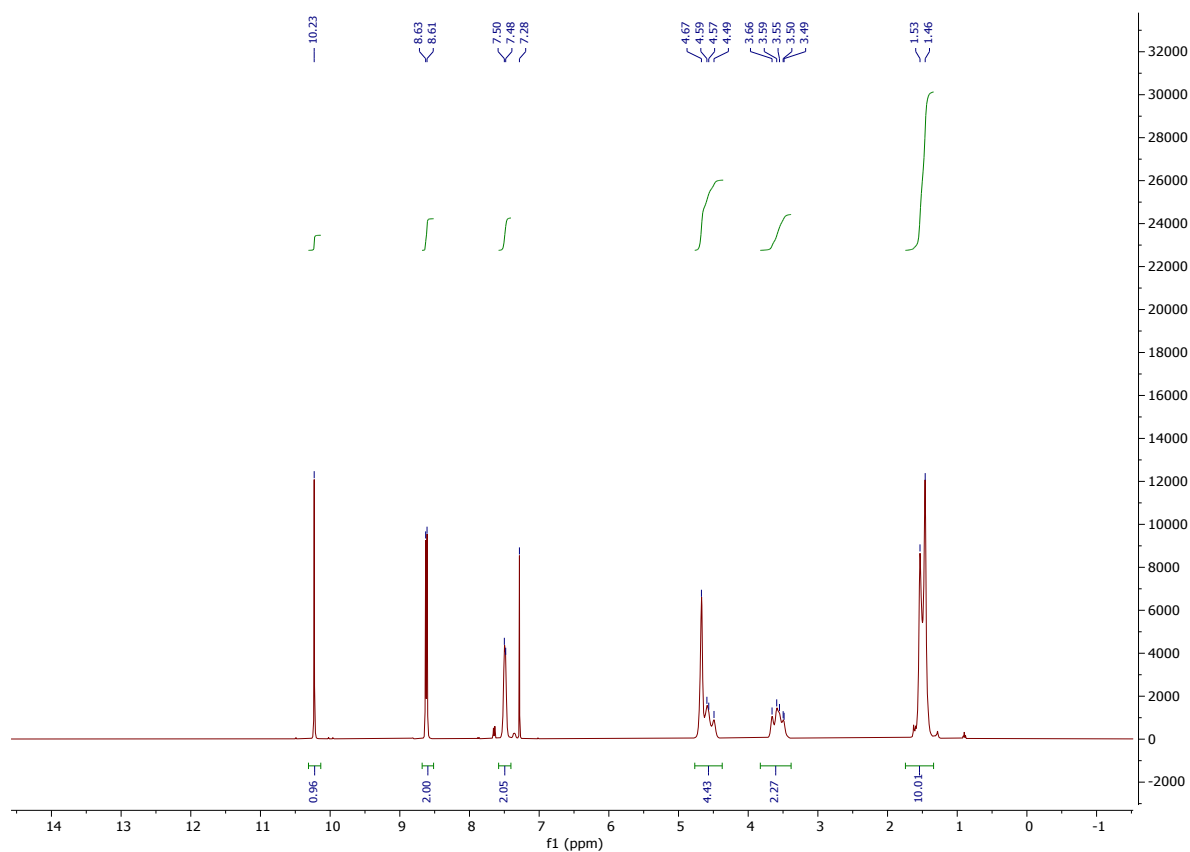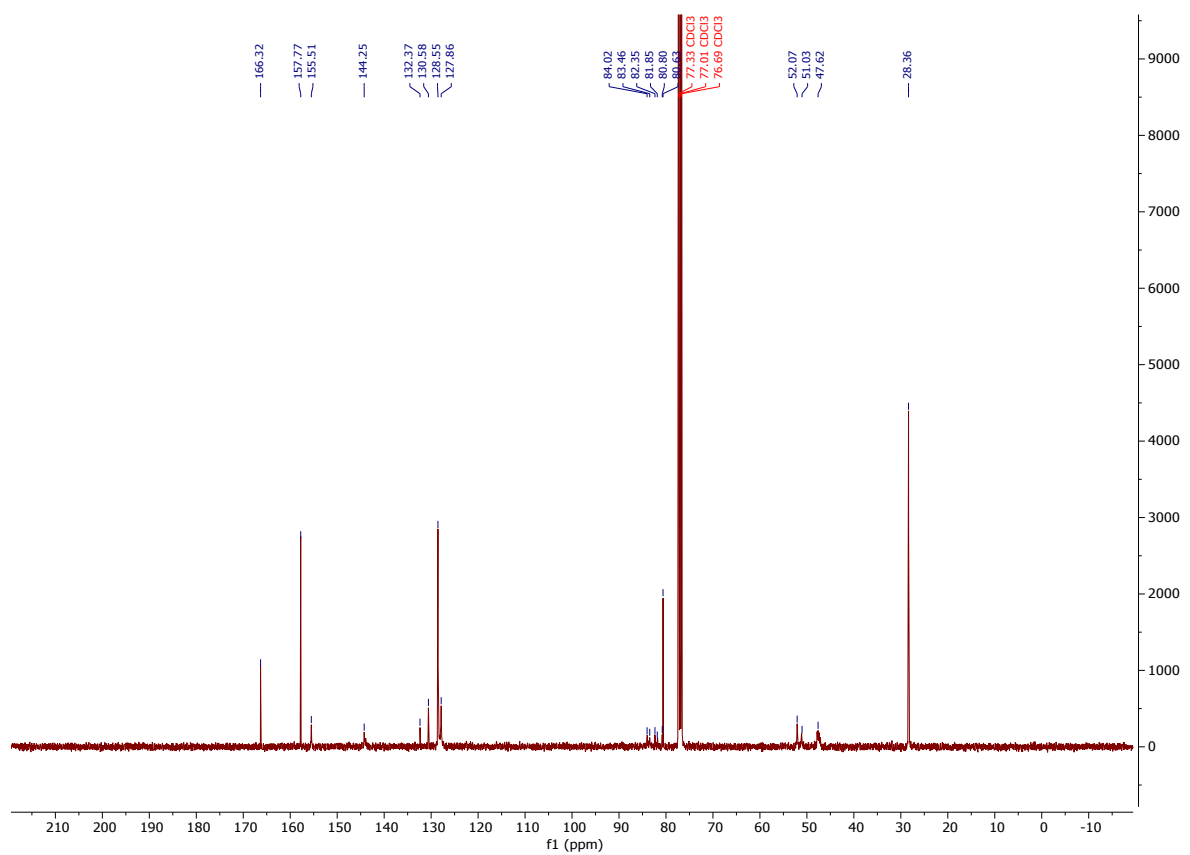

*N*-(4-Cyanobenzyl)acetamide (**S29**)

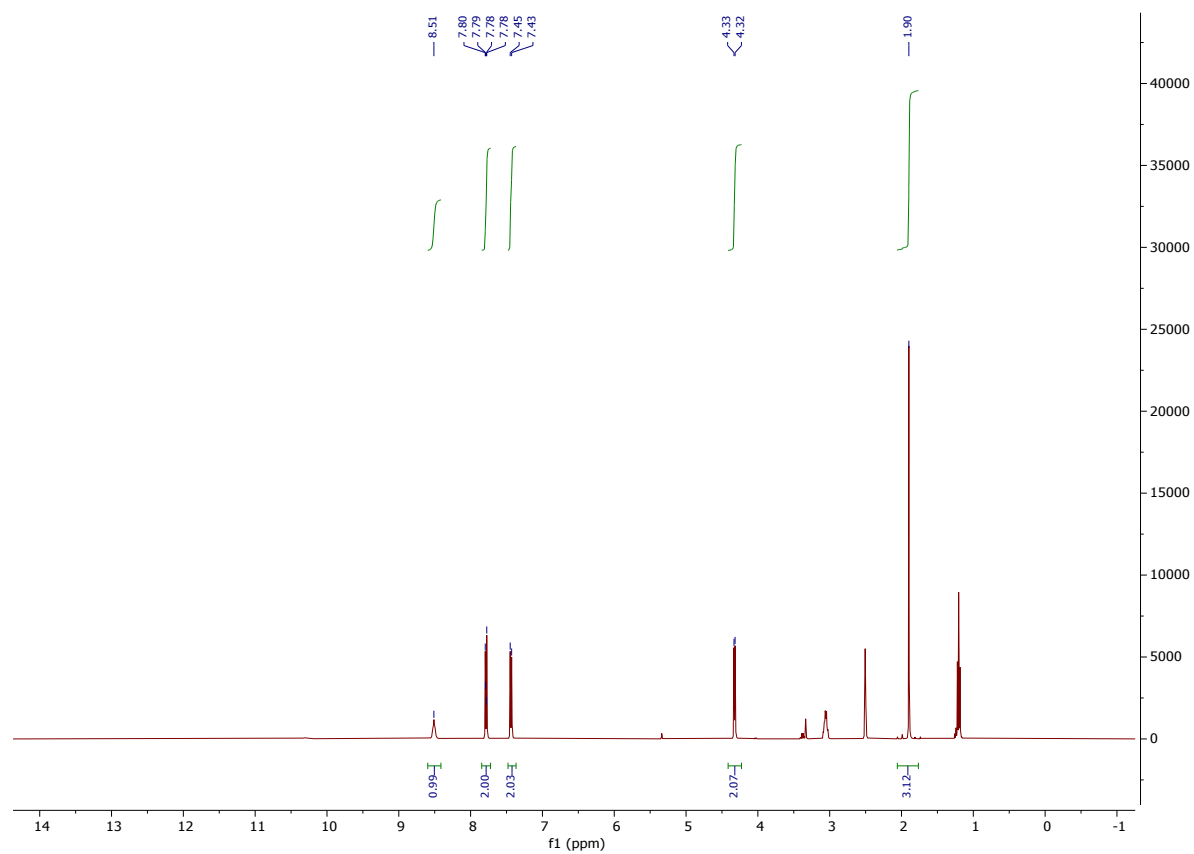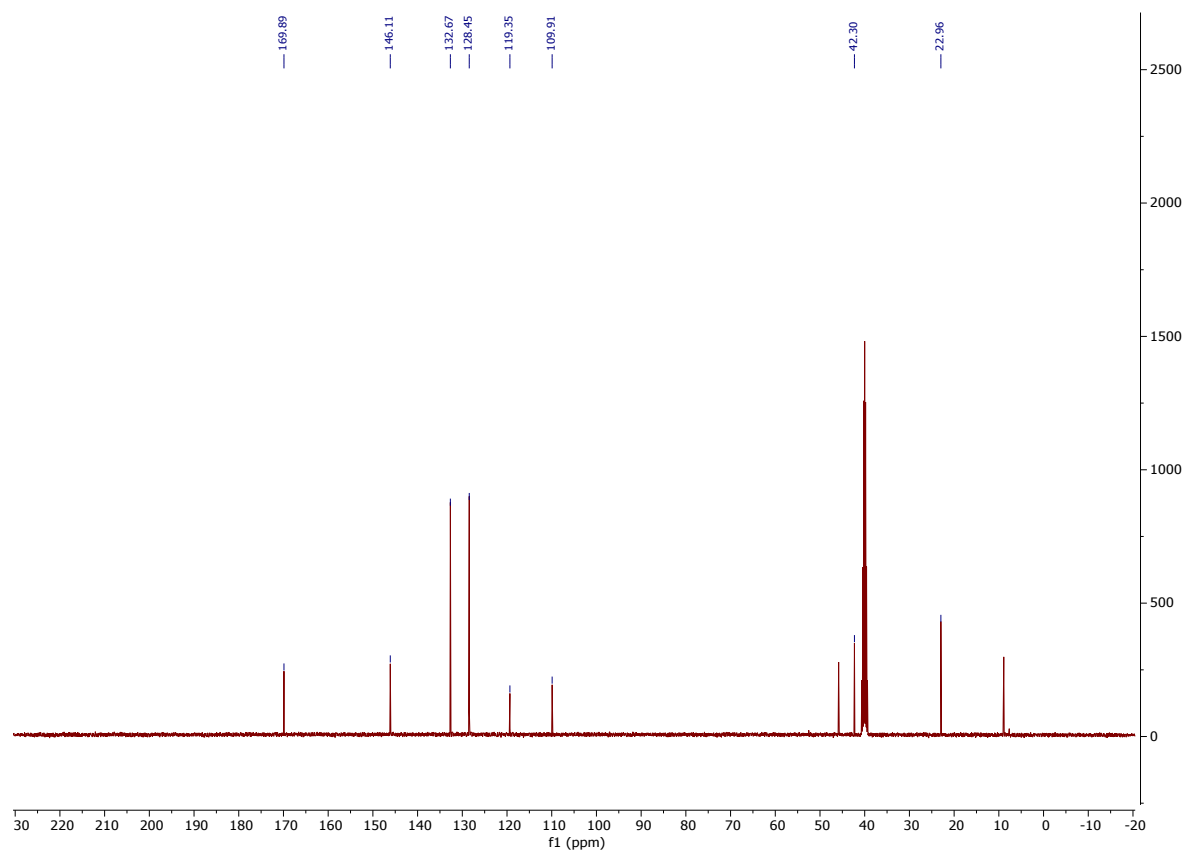

*Tert-butyl 2-((4-cyanobenzyl)amino)acetate (S30)*

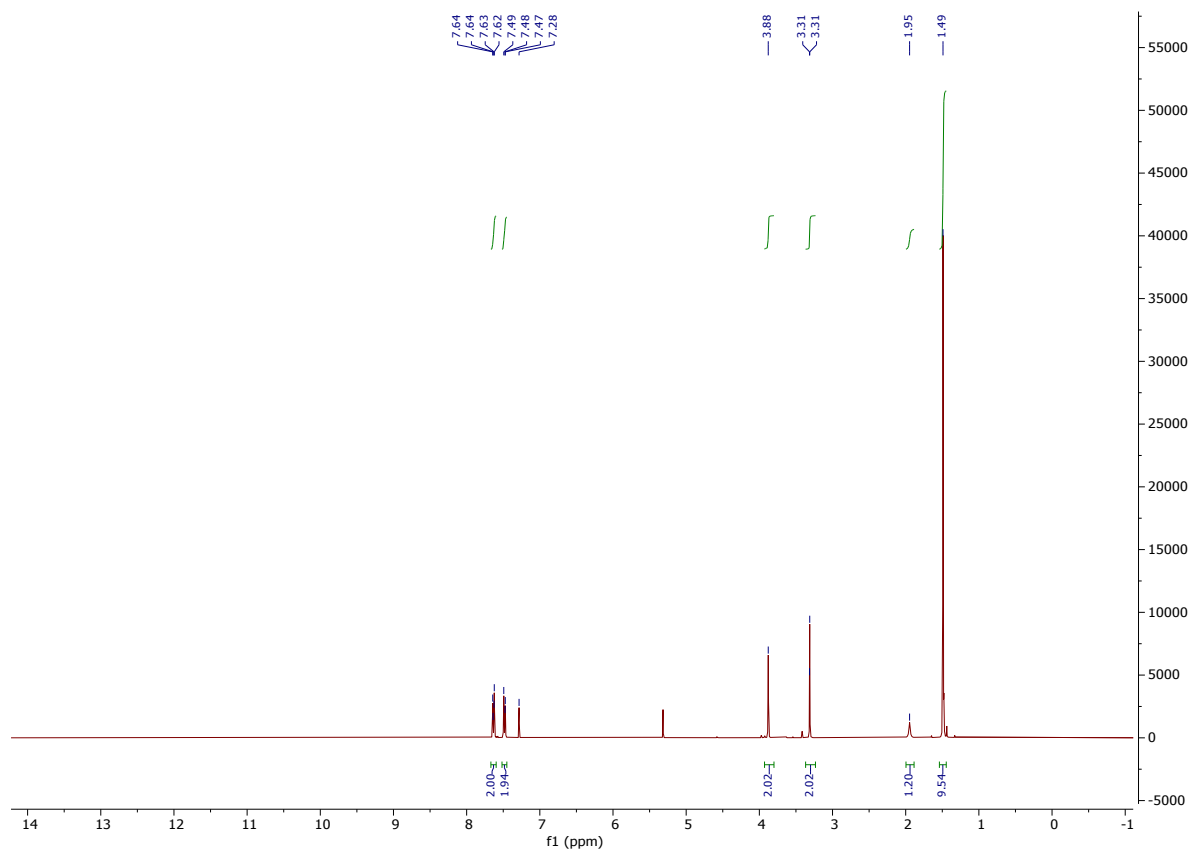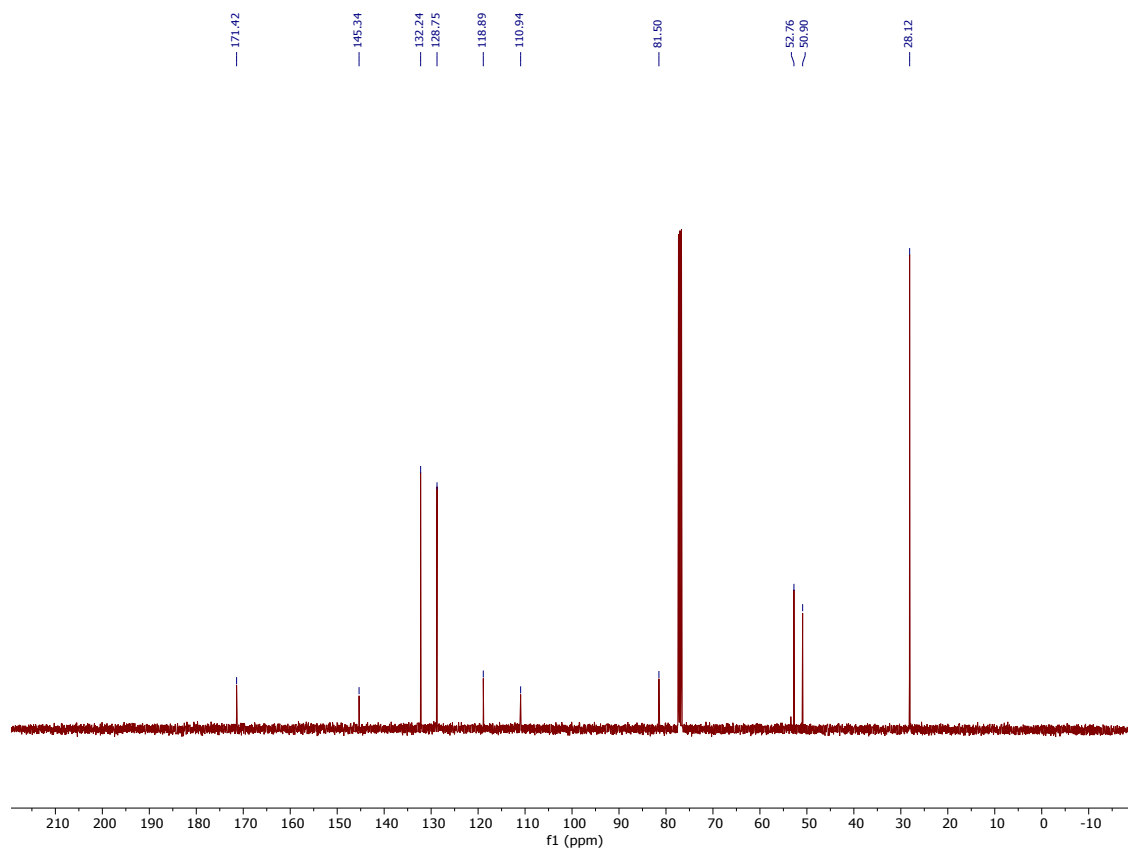

*Di-tert-butyl 2,2'-((4-cyanobenzyl)azanediyl)diacetate (S31)*

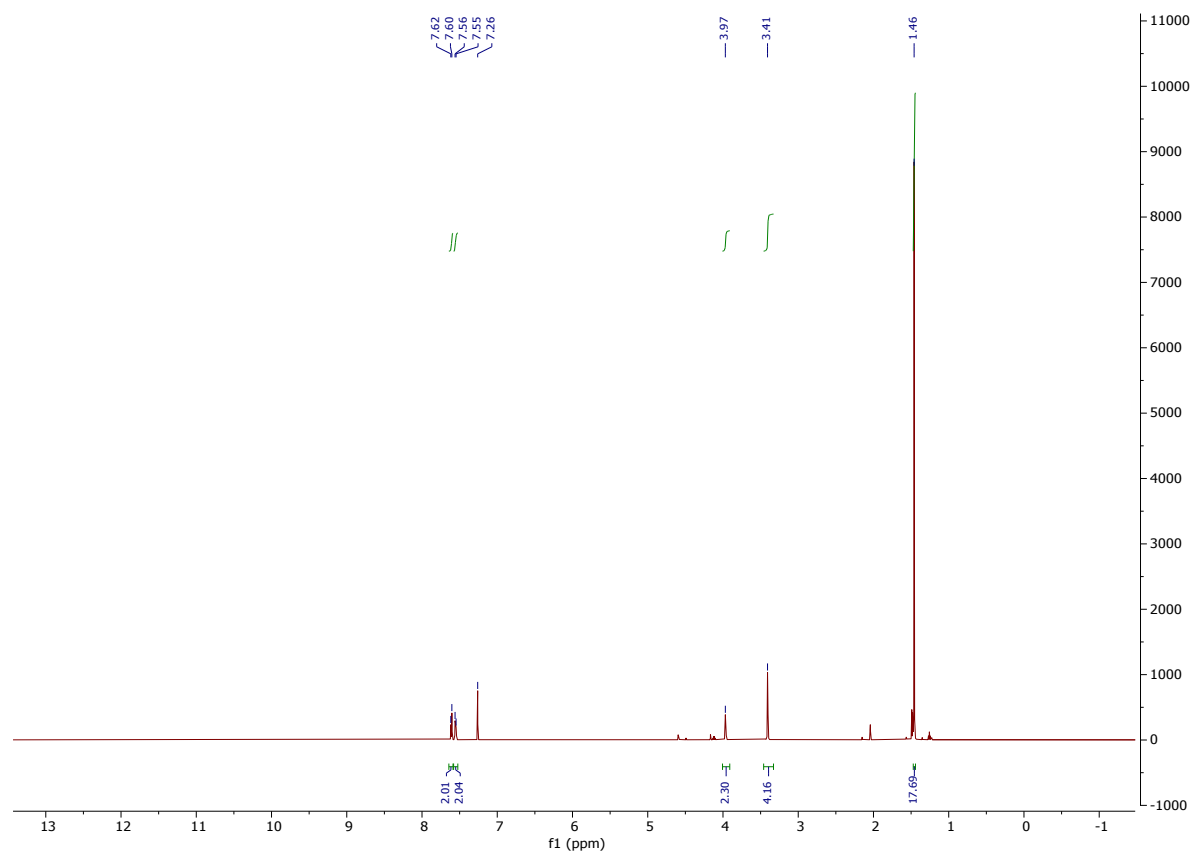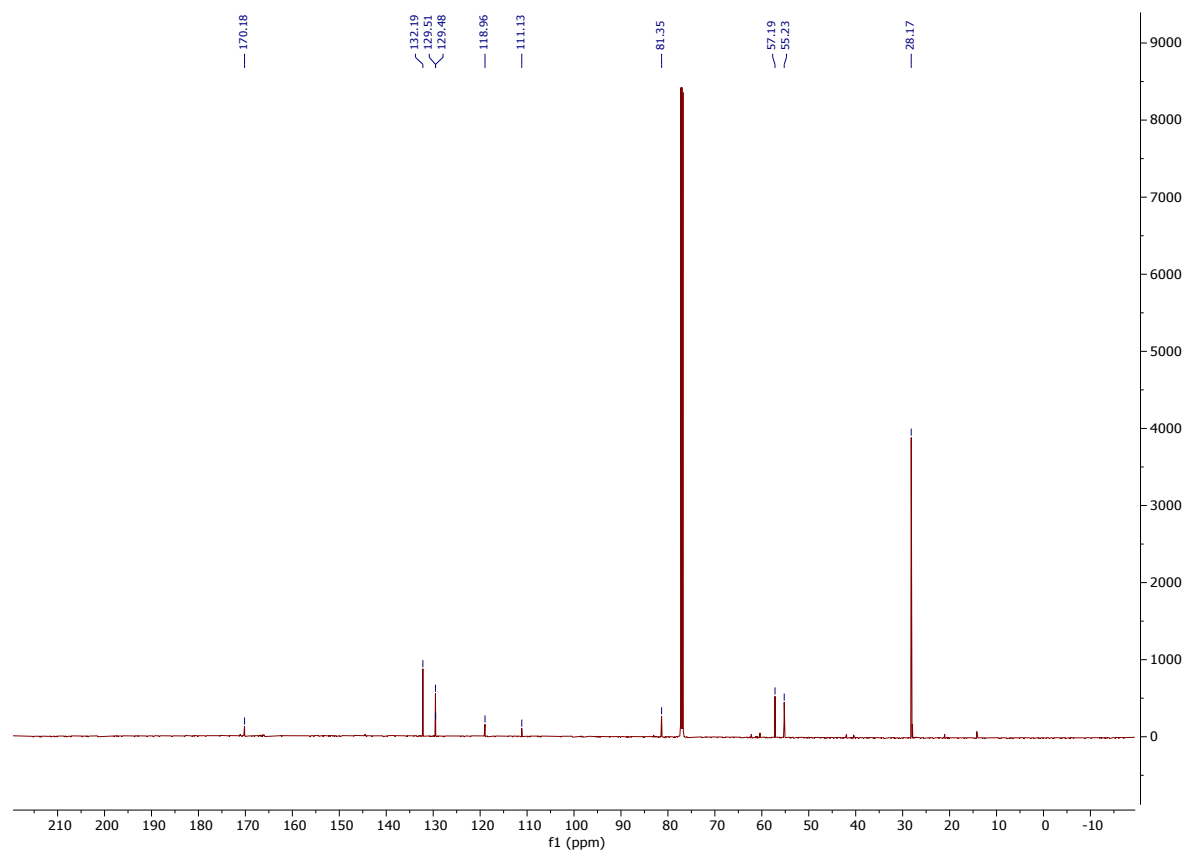

*Di-tert-butyl 2,2'-((4-(1,2,4,5-tetrazin-3-yl)benzyl)azanediyl)diacetate (S32)*

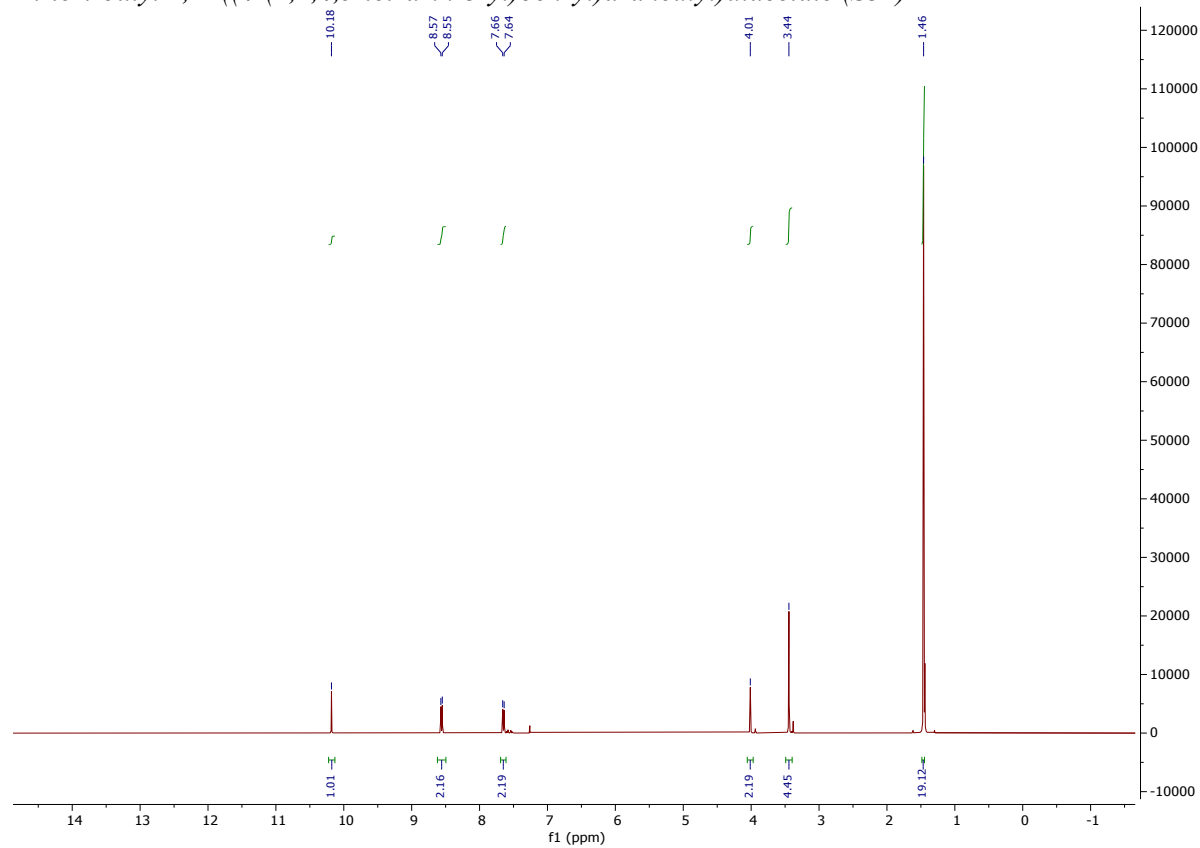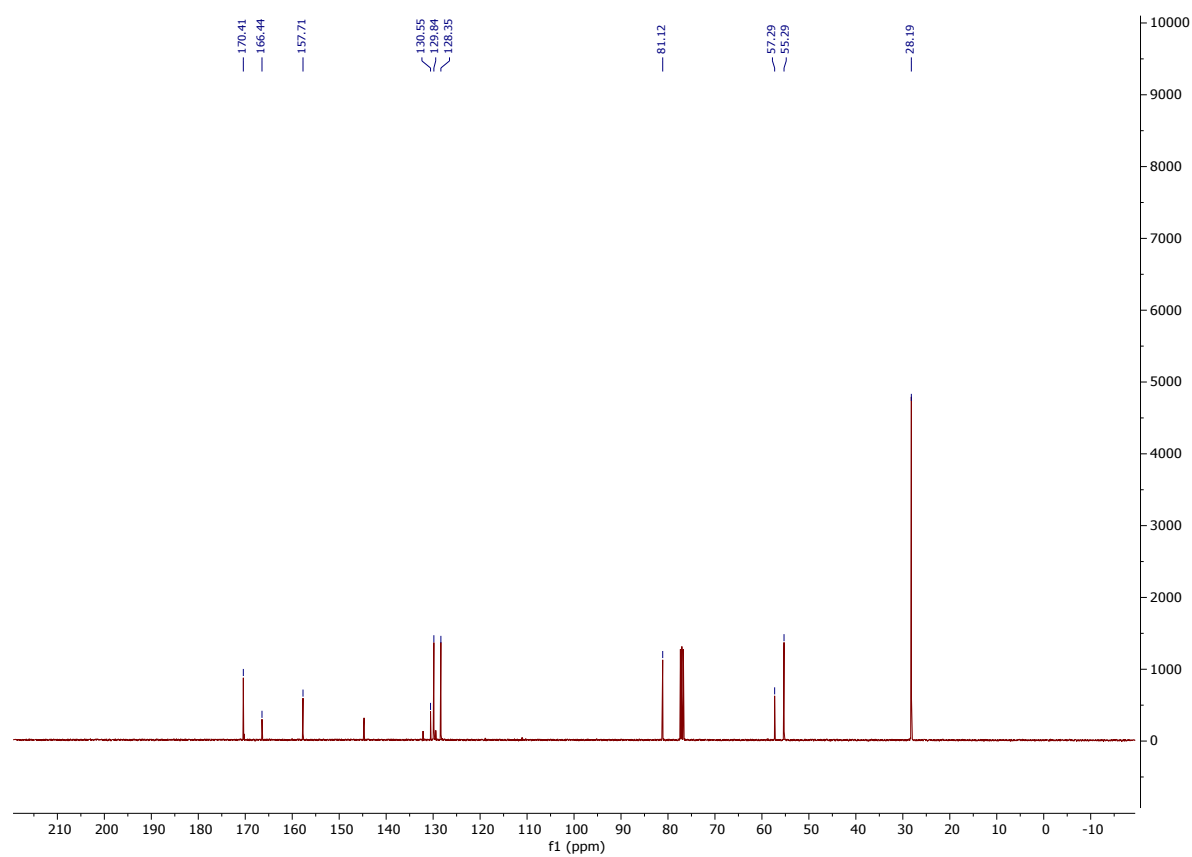

*Tert-butyl (8-((6-cyanopyridin-3-yl)amino)-8-oxooctyl)carbamate (S34)*

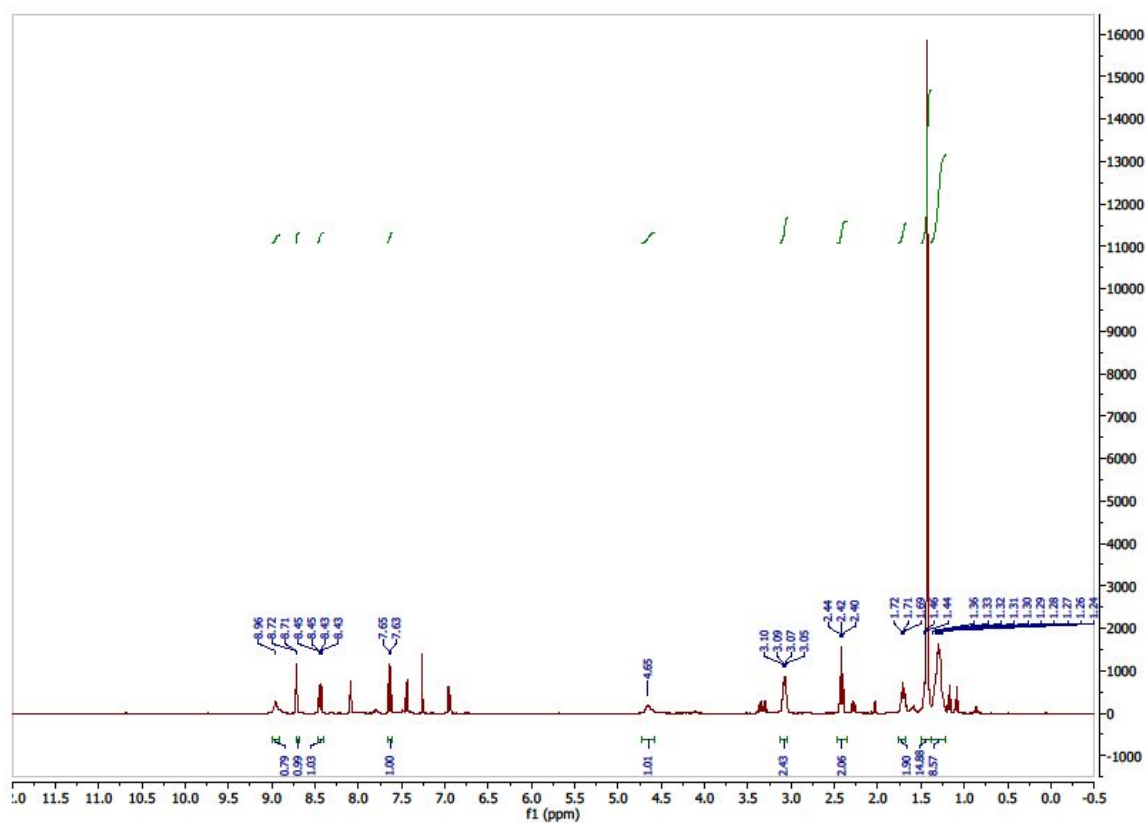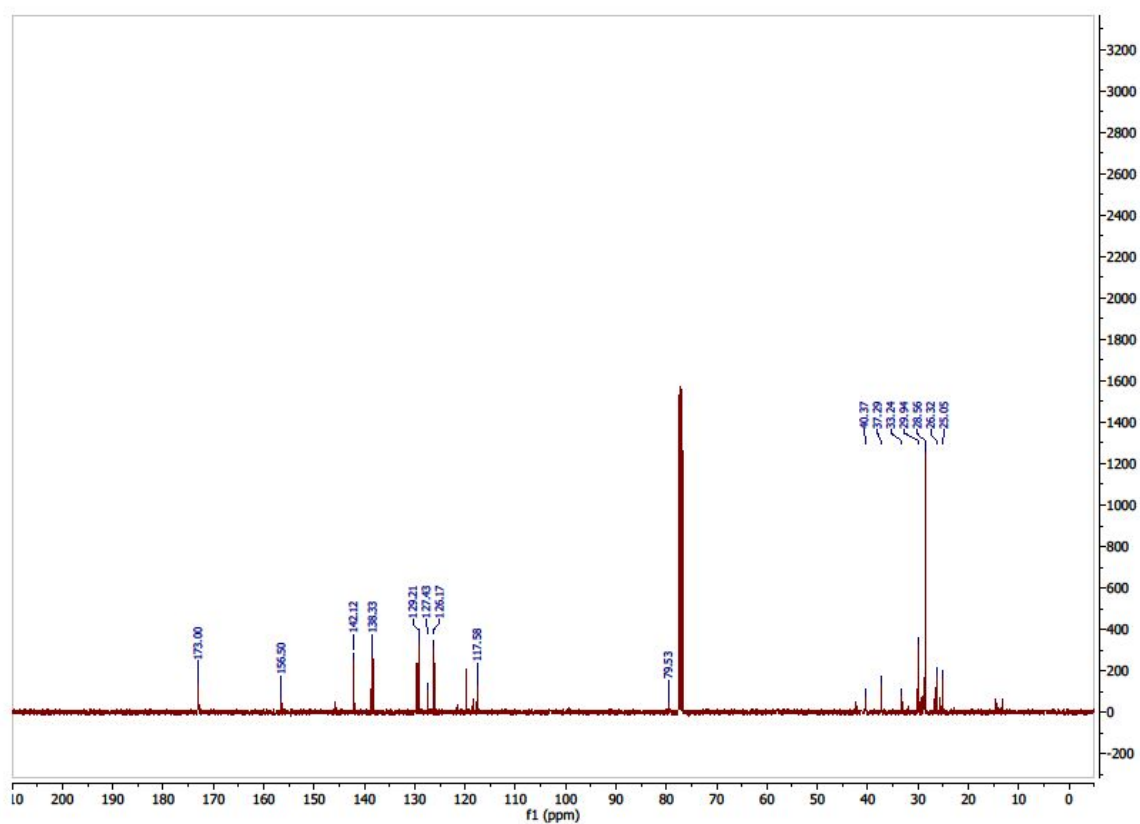





*Tert-Butyl (8-oxo-8-((6-(6-(pyridin-2-yl)-tetrazin-3-yl)pyridin-3-yl)amino)octyl)carbamate (S36)*

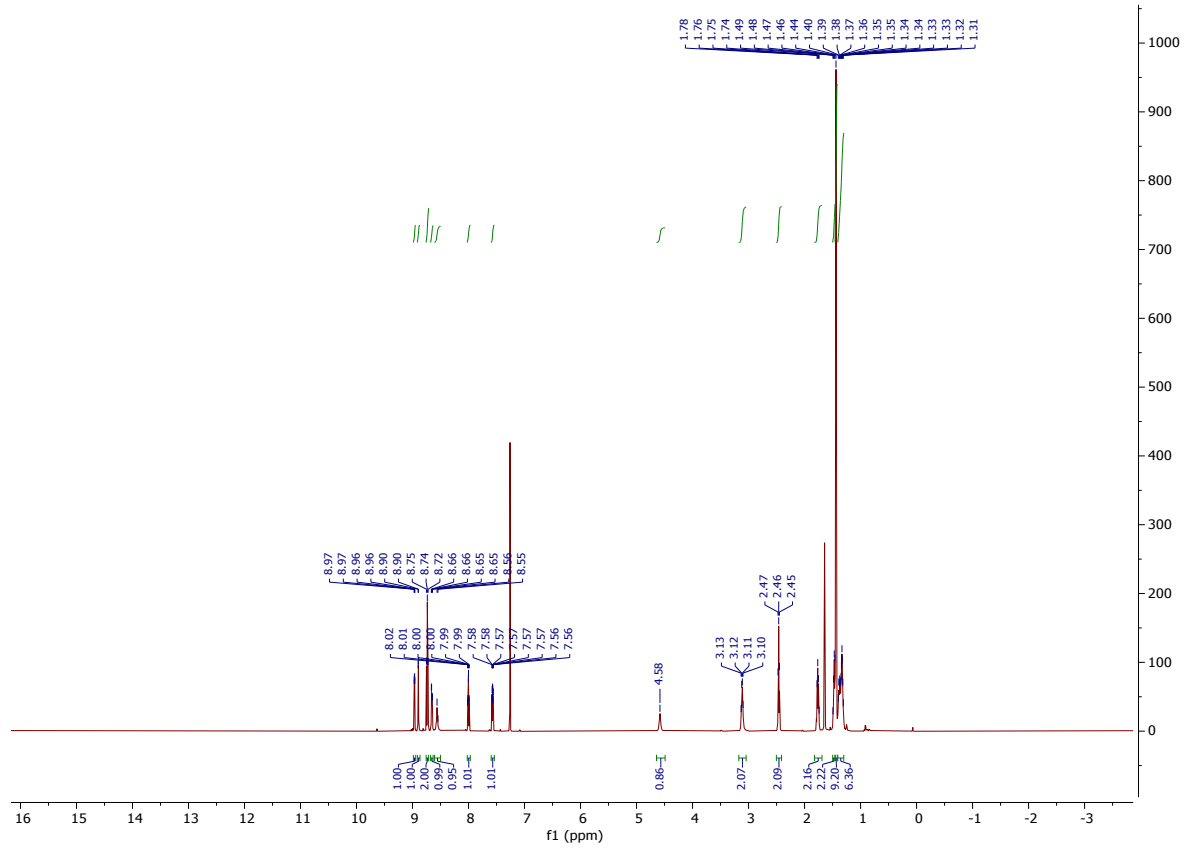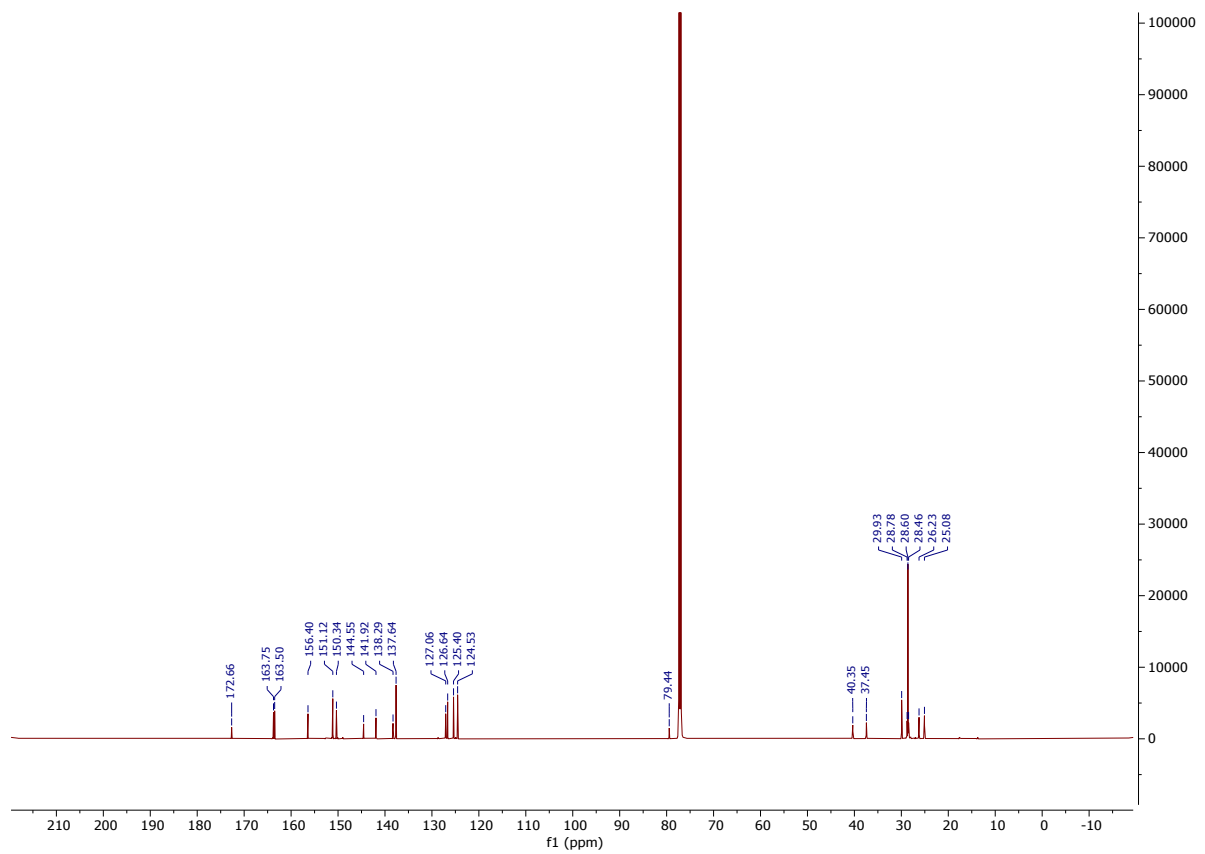

3-(1-(2-(2-(2-(2-Fluoroethoxy)ethoxy)ethoxy)ethyl)-1H-1,2,3-triazol-4-yl)propanoic acid (S40)

<sup>1</sup>H NMR

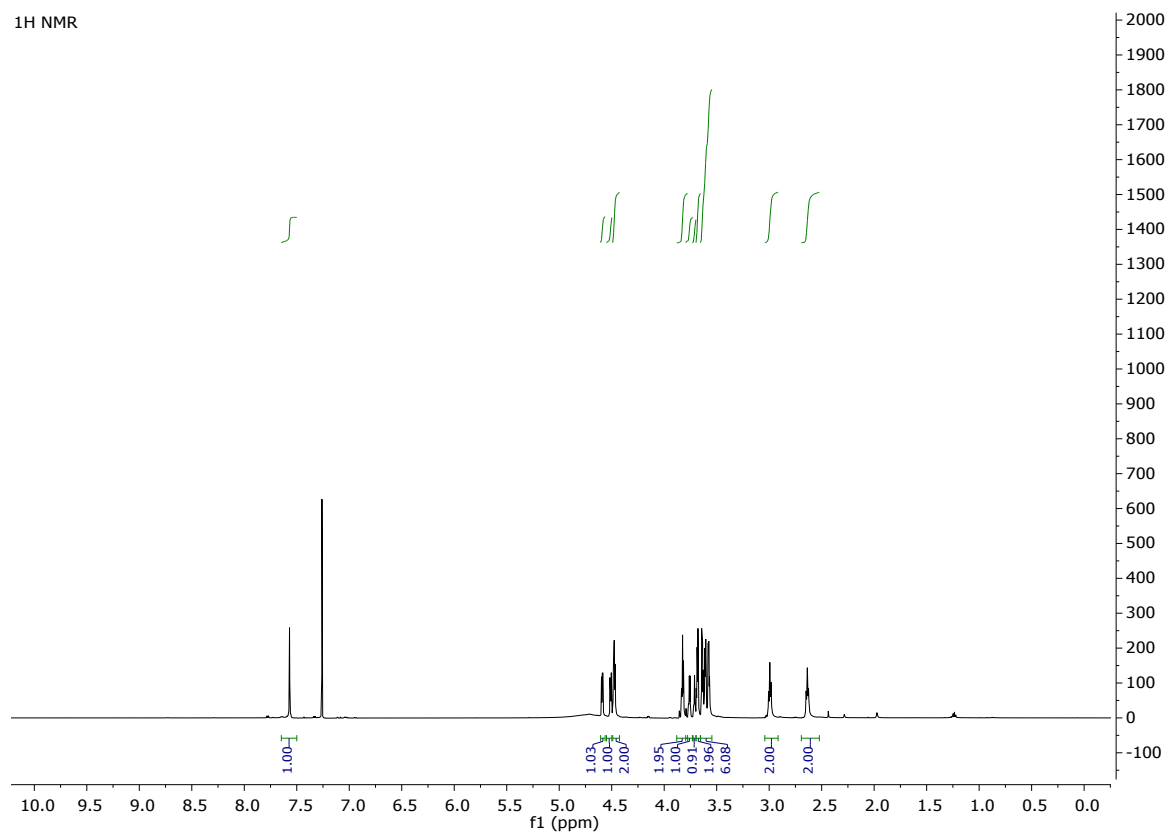

<sup>13</sup>C NMR

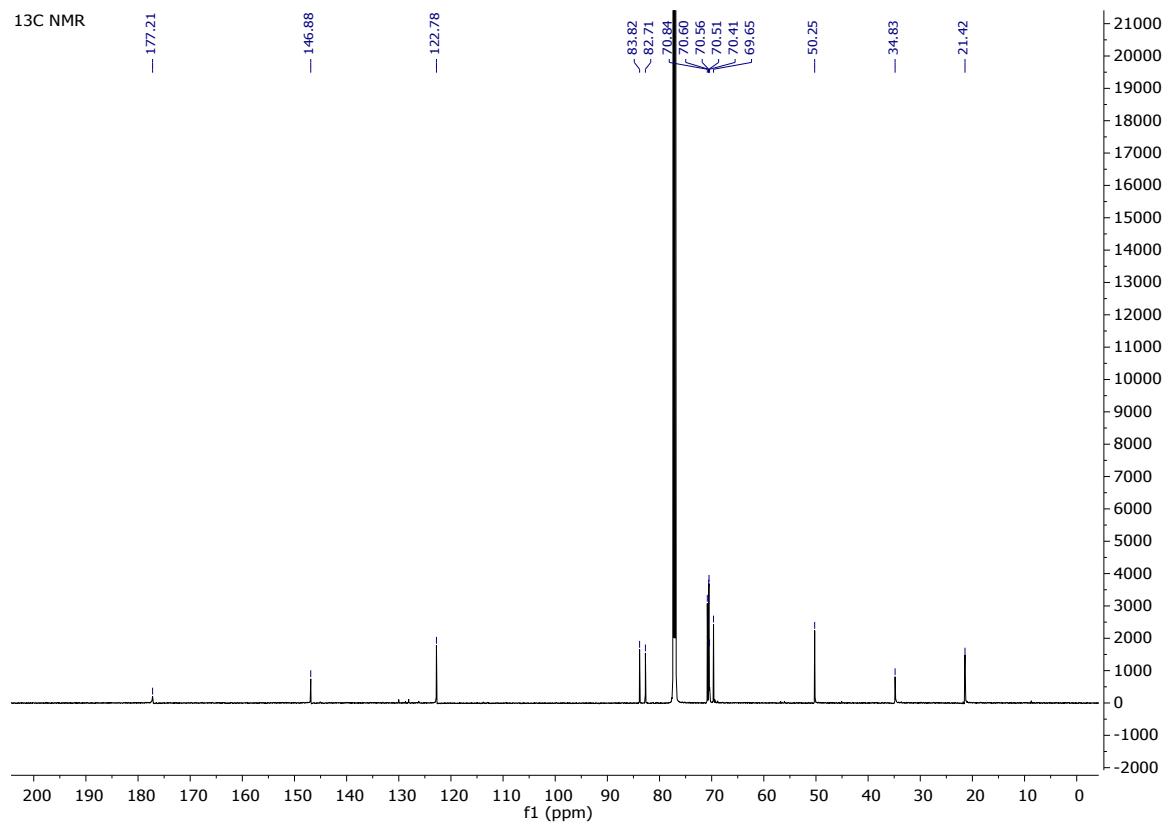

19F NMR

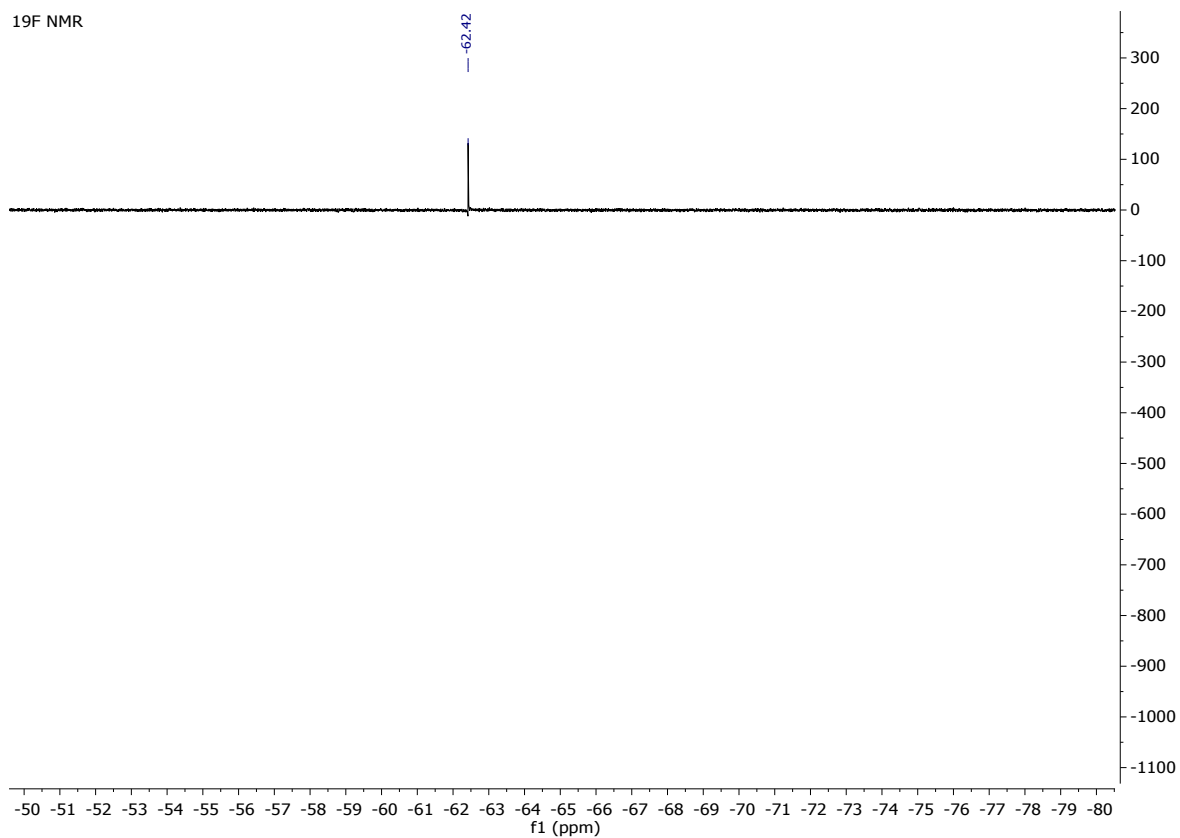

Supplement: pt1c00007_si_003.pdf [file pt1c00007_si_003.pdf]
